# Supplementary material for: Circuits for integrating learned and innate valences in the insect brain
Source: eLife journal article supplement (doi:10.7554/elife.62567), 2021-11-10
Supplement: supp [file elife-62567-supp-v1.zip]

Archive with 30 entries (30 files):
- elife_poa_e62567_Supplementary_File_2.csv
- elife_poa_e62567_Transparent_Reporting_File.pdf
- elife_poa_e62567_Figure_2_figure_supplement_1.pdf
- elife_poa_e62567_Figure_2_figure_supplement_2.pdf
- elife_poa_e62567_Figure_2_figure_supplement_3.pdf
- elife_poa_e62567_Figure_3_figure_supplement_1.pdf
- elife_poa_e62567_Figure_3_figure_supplement_2.pdf
- elife_poa_e62567_Figure_3_figure_supplement_3.pdf
- elife_poa_e62567_Figure_3_figure_supplement_4.pdf
- elife_poa_e62567_Figure_3_figure_supplement_5.pdf
- elife_poa_e62567_Figure_4_figure_supplement_1.pdf
- elife_poa_e62567_Figure_4_figure_supplement_2.pdf
- elife_poa_e62567_Figure_5_figure_supplement_1.pdf
- elife_poa_e62567_Figure_6_figure_supplement_1.pdf
- elife_poa_e62567_Figure_6_figure_supplement_2.pdf
- elife_poa_e62567_Supplementary_file_1.csv
- elife_poa_e62567_Figure_2_source_data_1.csv
- elife_poa_e62567_Figure_3_source_data_1.csv
- elife_poa_e62567_Figure_4_source_data_1.csv
- elife_poa_e62567_Figure_4_source_data_2.csv
- elife_poa_e62567_Figure_4_source_data_3.csv
- elife_poa_e62567_Figure_5_source_data_1.csv
- elife_poa_e62567_Figure_5_source_data_2.csv
- elife_poa_e62567_Figure_5_source_data_3.csv
- elife_poa_e62567_Figure_6_source_data_1.csv
- elife_poa_e62567_Figure_6_source_data_2.csv
- elife_poa_e62567_Figure_6_source_data_3.csv
- elife_poa_e62567_Figure_6_source_data_4.csv
- elife_poa_e62567_Figure_6_source_data_5.csv
- elife_poa_e62567_Transparent_Reporting_File.docx
