# Supplementary material for: Circuits for integrating learned and innate valences in the insect brain
Source: eLife journal article supplement (doi:10.7554/elife.62567), 2021-11-10
Supplement: supp [file elife-62567-supp-v1.zip]

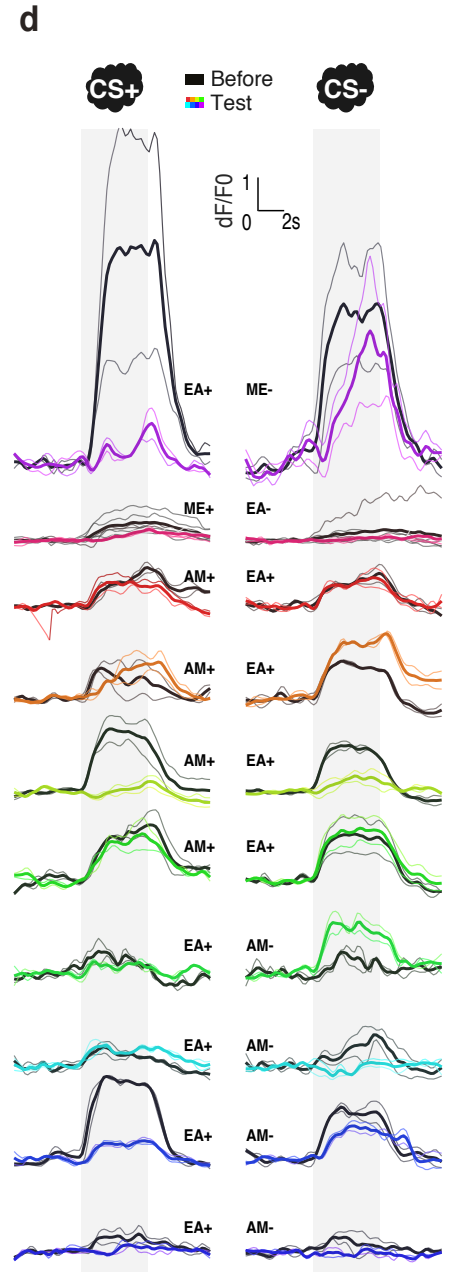

**Figure 4 - Figure Supplement 2. Calcium responses of MBON-m1 for each individual.**

Calcium activity of MBON-m1 was imaged in vivo (using *SS02163-GAL4 > UAS-GCamp6f*) in first instar larvae immobilised in a microfluidic device [68] and exposed to the odor EA (**a,b,d**) and/or to optogenetic activation of CsChrimson-expressing KCs (**c,d**). Each curve shows fluorescence normalized to baseline (before odor presentation) for each repeat (2 to 4) per animal (mean  $\pm$  s.e.m.). Each color corresponds to one individual, thicker curve is averaged response for this individual. In **b-c** responses in the same animal to different kinds of stimulations (odor or KC activation) are shown in the same color. Smoothed averaged individual responses are also shown in Fig. 4c-d and Fig. 5a.

**a.** Response of MBON-m1 to EA in larvae with silenced MB (using *14H06-LexA > LexAop-TNTE*). **b.** Response of MBON-m1 to EA in larvae with intact MB (in *14H06-LexA > LexAop-CsChrimson*). **c.** Response of MBON-m1 to activation of MB (using *14H06-LexA > LexAop-CsChrimson*). **d.** Response of MBON-m1 to two odors, CS+ and CS-, before (*in black*) and after (*in color*) the CS+ was paired with optogenetic activation of the nociceptive neurons Basins (olfactory aversive training).
