# Supplementary material for: Circuits for integrating learned and innate valences in the insect brain
Source: eLife journal article supplement (doi:10.7554/elife.62567), 2021-11-10
Supplement: supp [file elife-62567-supp-v1.zip]

**a** Similarity of LHNs based on postsynaptic CNs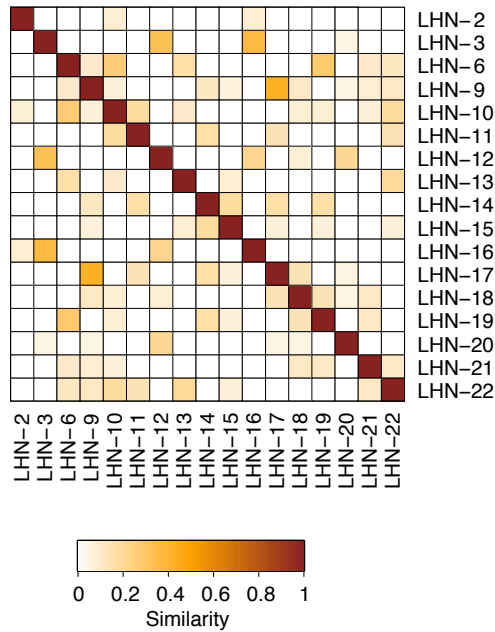**b** Similarity of MBONs based on postsynaptic CNs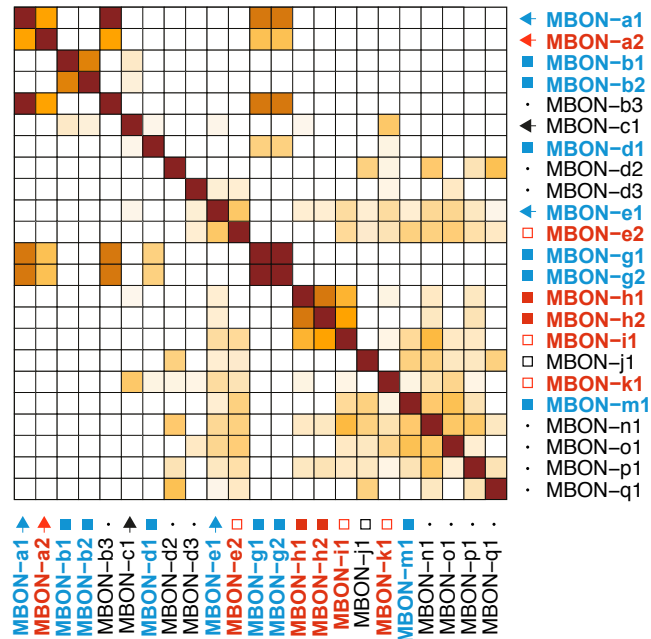**c** Similarity of MBON and LHN inputs onto CNs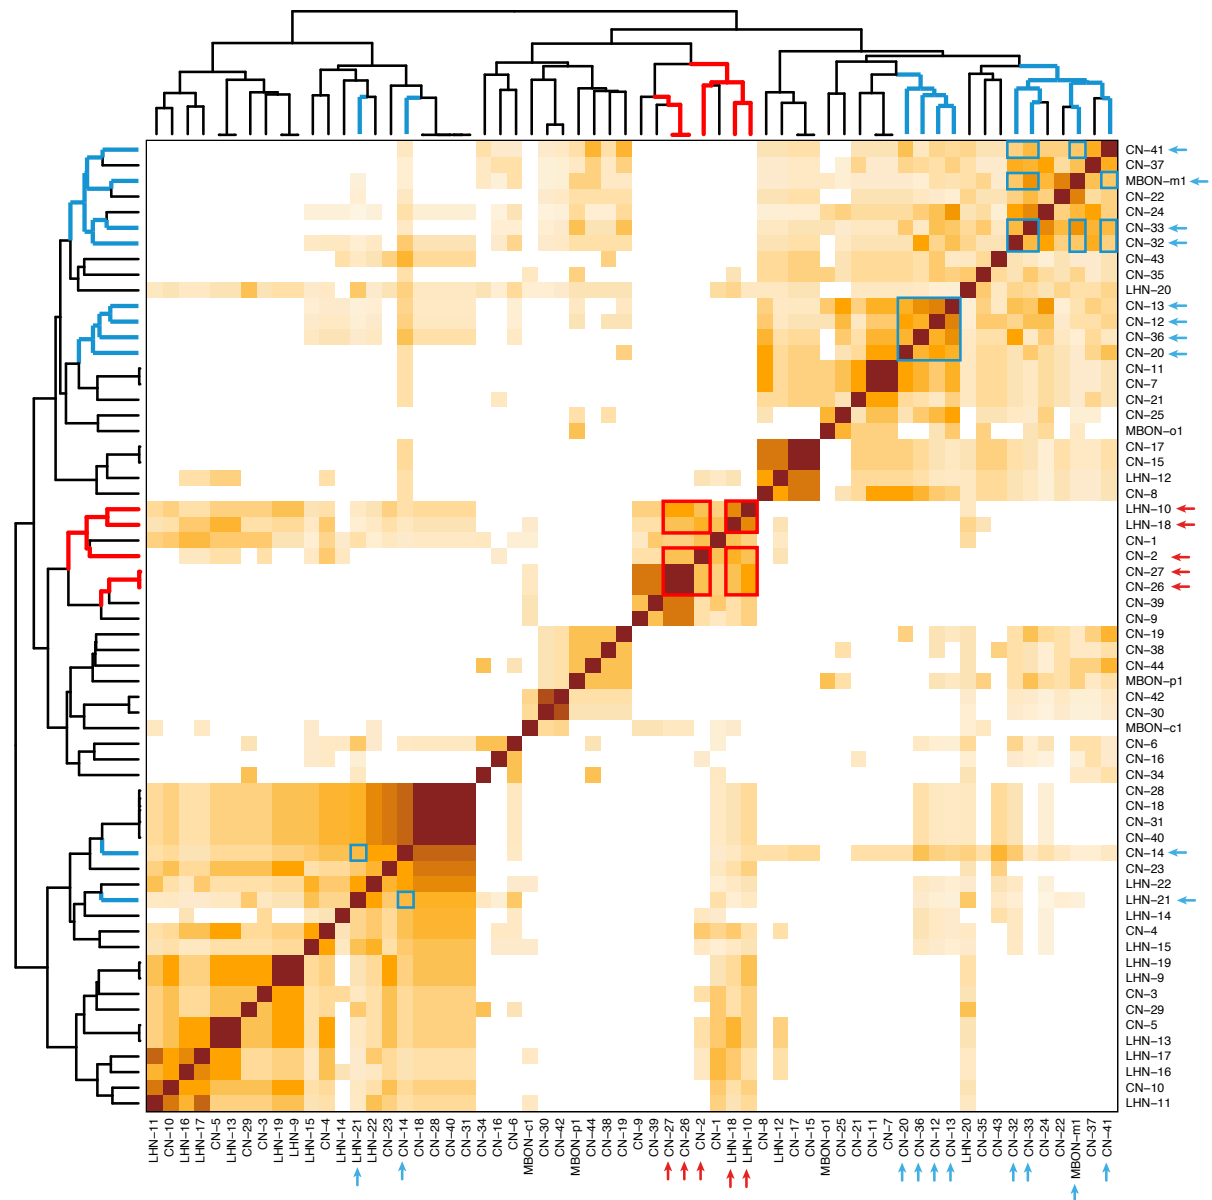

**d** CNs clustered according to MBON inputs

**e** CNs clustered according to MB2ON inputs

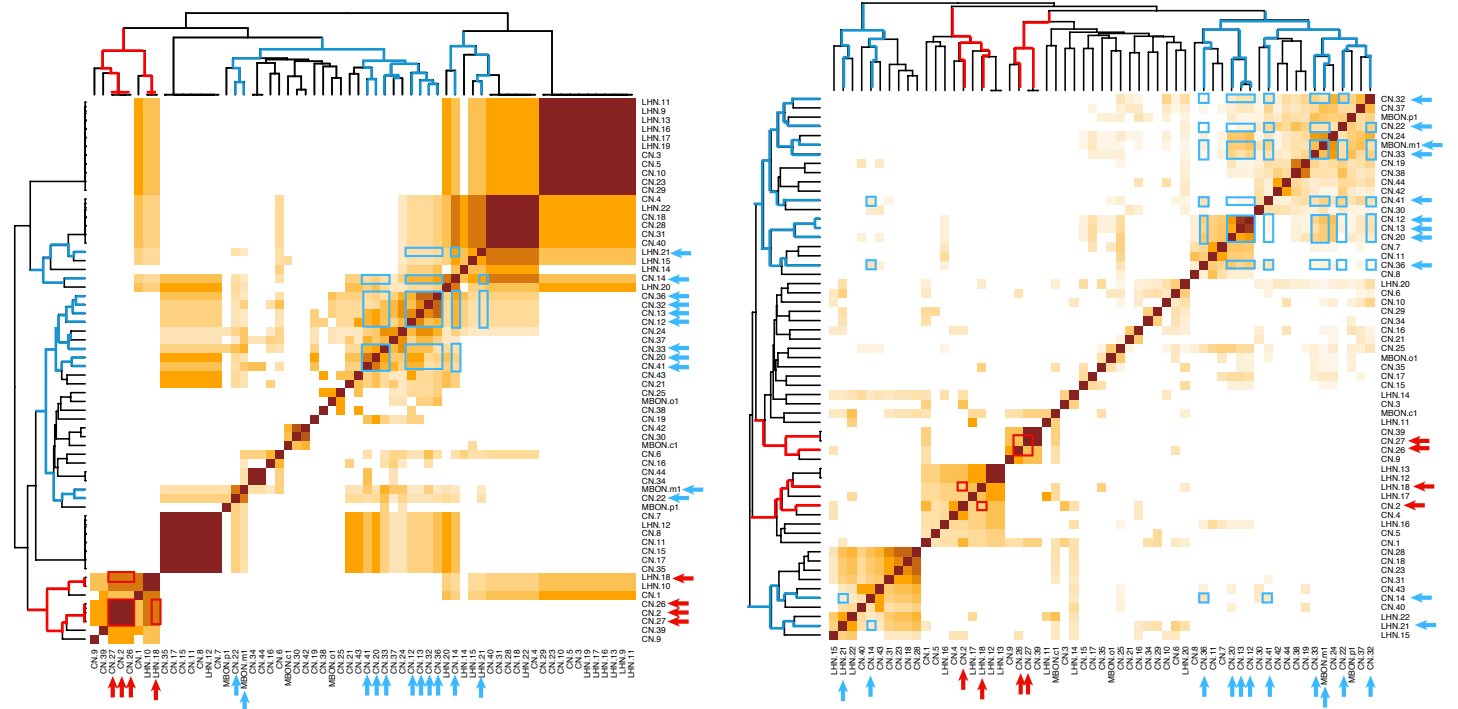

**Figure 3 - Figure Supplement 5: Analysis of CNs inputs.** See previous page.

**a-b.** Matrices of similarity between neurons based on their output connections onto CNs (**a-b**), defined as the subset of MB2ONs which receives inputs from both the LH pathway downstream of ORN42a/ORN42b and MBONs. Similarity is obtained following the method described in Figure Supplement 2c. **a.** Similarity matrix of LHNs based on outputs to CNs. **b.** Similarity matrix of MBONs based on outputs to CNs. Most MBONs and LH neurons have a unique combination of postsynaptic CN partners.

**c.** Similarity matrix of CNs based on their total number of inputs from MBONs and LHNs (as in Figure Supplement 2c, but taking LHN inputs into account also). Most CNs receive a unique combination of MBON and LHN inputs. Hierarchical clustering was applied to the similarity scores to sort MB2ONs. Blue and red arrows indicate positive and negative value neurons, respectively, independently predicted based on MBON inputs (from Fig. 3f). Blue and red boxes highlight similarity between the predicted positive and negative value neurons, respectively, within clusters.
