# Supplementary material for: Circuits for integrating learned and innate valences in the insect brain
Source: eLife journal article supplement (doi:10.7554/elife.62567), 2021-11-10
Supplement: supp [file elife-62567-supp-v1.zip]

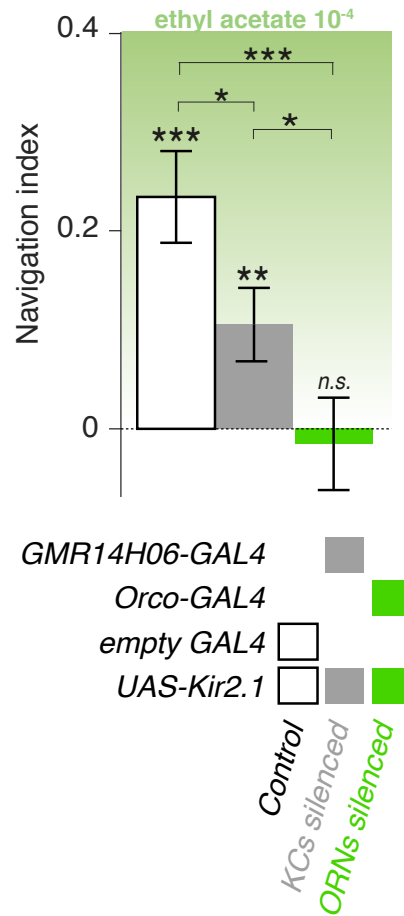

**Figure 3 - Figure Supplement 4: Functioning Kenyon Cells are required for normal approach behavior of an odor.**

The behavior of larvae in a linear gradient of an innately attractive odor (EA) is assessed in naive larvae with silenced KCs (using *GMR14H06-GAL4* crossed to *UAS-Kir2.1*) and ORNs (using *orco-GAL4* crossed to *UAS-Kir2.1*). The navigational index in larvae with non functioning MBs is lower than the in control larvae (*empty GAL4* crossed to *UAS-Kir2.1*), but navigation is not abolished (navigation index is significantly higher than 0). Inhibiting ORNs abolishes navigation. \*:  $p < 0.05$ , \*\*:  $p < 0.01$ , \*\*\*:  $p < 0.001$  (Welch Z test).
