# Supplementary material for: Circuits for integrating learned and innate valences in the insect brain
Source: eLife journal article supplement (doi:10.7554/elife.62567), 2021-11-10
Supplement: supp [file elife-62567-supp-v1.zip › elife_poa_e62567_Figure_2_figure_supplement_1.pdf]

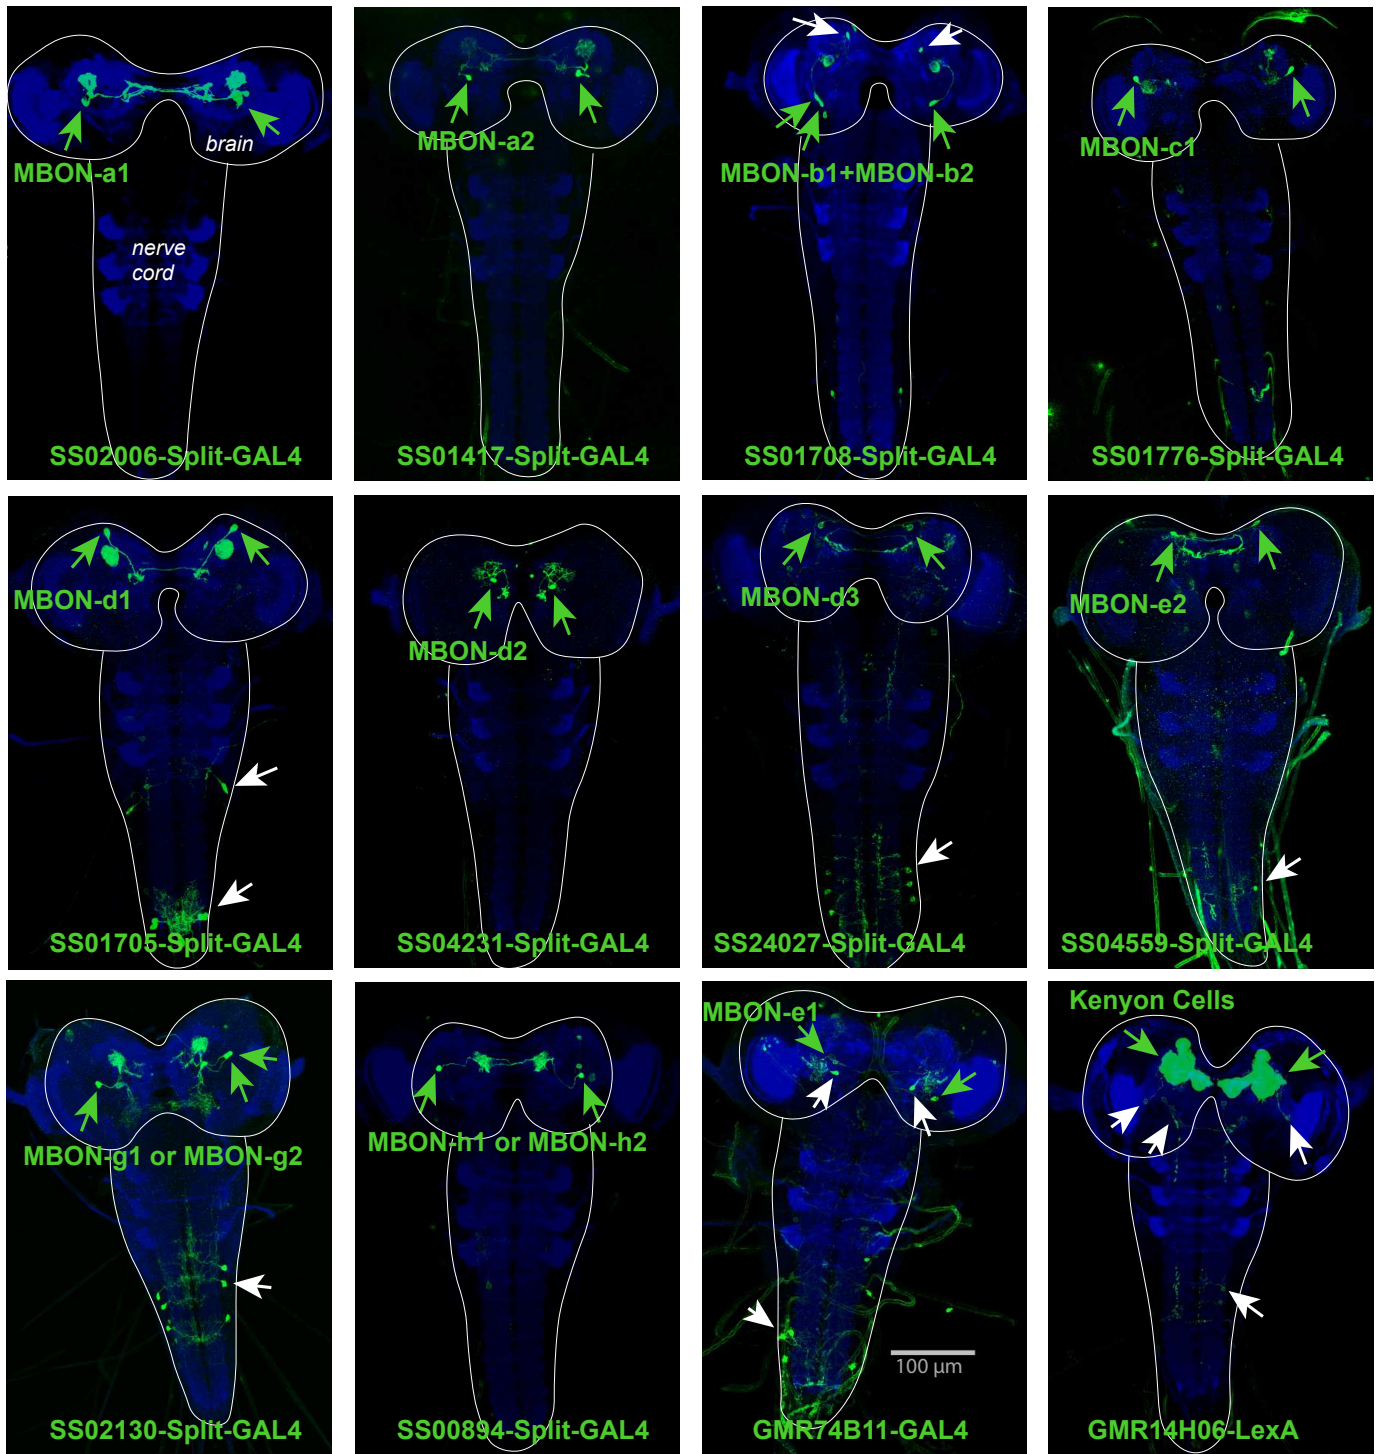

**Figure 2 - Figure Supplement 1: Expression patterns of Split-GAL4 lines.**

Each panel shows a confocal maximum intensity projection of the complete central nervous system (CNS) of third-instar larvae (outlined by the dotted line), with the neuropil labeled with anti-N-Cad antibody (blue) and the driver line expression pattern revealed by driving *UAS-myr-GFP* (green). Arrowheads indicate cell bodies of identified neurons: in green the targeted neuron, in white other neurons. The Split-GAL4 lines *SS02006* (for MBON-a1), *SS01417* (for MBON-a2), *SS01776* (for MBON-c1), *SS04321* (for MBON-d2), *SS00894* (for MBON-h1 and -h2) drive expression specifically in the neurons of interest. The lines *SS01708* (for MBONb1 and -b2) also drive expression in another brain neuron type. *SS01705* (for MBON-d1), *SS24027* (for MBON-d3), *SS04559* (for MBON-e2), *SS02130* (for MBON-g1 or -g2) target interneurons in the ventral nerve cord in addition to the neuron of interest; and *GMR74B11* (MBON-e1) drive expression in another brain neuron and in neurons of the ventral nerve cord (eliminated using the GAL80 repressor in *teashirt-LexA* for the ventral nerve cord). The *14H06-LexA* line drives expression in the MB Kenyon cells and weakly and stochastically in two additional brain neurons, and in an additional neuron in the ventral nerve cord.
