# Supplementary material for: Circuits for integrating learned and innate valences in the insect brain
Source: eLife journal article supplement (doi:10.7554/elife.62567), 2021-11-10
Supplement: supp [file elife-62567-supp-v1.zip › elife_poa_e62567_Figure_2_figure_supplement_2.pdf]

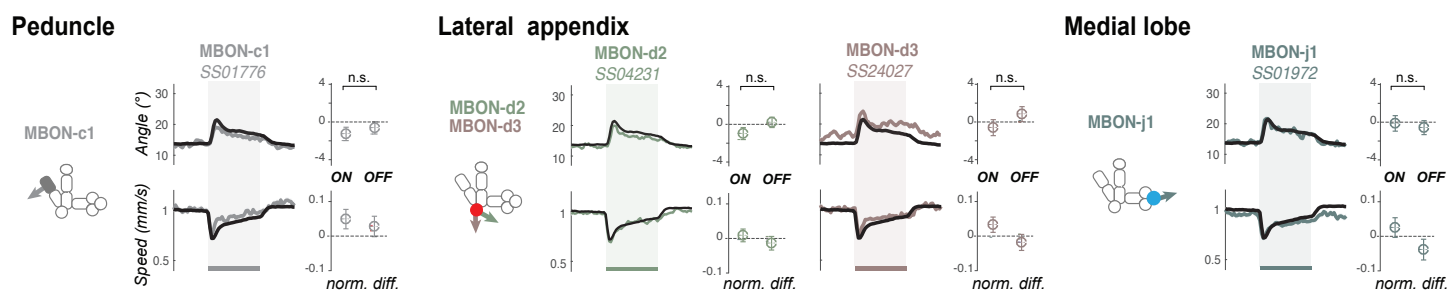

**Figure 2 - Figure Supplement 2: Some MBONs do not promote visible response when optogenetically activated.**

The behavior of larvae expressing CsChrimson in one or two pairs of MBONs were recorded and compared to the response of the control empty driver line to red light (*black*, which itself shows a slight increase in turn in response to light onset). All experiments include at least 6 runs with *ca.* 40 animals per run. Here we show the responses evoked by the lines driving expression in MBONs and that were not significantly different from the control response. The name of the Split-GAL4 line used is shown in *italic*. The schematics depict the compartments where the MBONs extend their dendrites. Color indicate type of memory induced when the DAN that innervates that compartment is paired with odor [36]: appetitive (*blue*), aversive (*red*), or unknown (*grey*). Plots and quantification as in Fig. 2b-g. n.s.:  $p > 0.05$  of difference to control (Welch Z test).
