# Supplementary material for: Circuits for integrating learned and innate valences in the insect brain
Source: eLife journal article supplement (doi:10.7554/elife.62567), 2021-11-10
Supplement: supp [file elife-62567-supp-v1.zip › elife_poa_e62567_Figure_2_source_data_1.csv]

Value angles showing turn responses of animals during activation of MBONs
Mean and std values of the turn angles over time in the different experimental groups shown in Figure 2b-g.
time_interval	stim_ON	emptySplit_Chrimson_Ven_mean	emptySplit_Chrimson_Ven_std	MBONg1org2_Chrimson_Ven_mean	MBONg1org2_Chrimson_Ven_std	MBONm1_Chrimson_Ven_mean	MBONm1_Chrimson_Ven_std
20	0	1.009128941	0.580803152	12.41973852	12.79287625	1.040452457	0.752962686
20.5	0	1.002813316	0.577849909	12.3792462	12.40154838	1.053469774	0.780400451
21	0	1.00375607	0.579691987	12.37621138	11.66202082	1.042580004	0.775931953
21.5	0	1.002223496	0.578895091	12.75514223	13.43185183	1.070250789	0.764239629
22	0	0.997636578	0.579450681	13.11801572	14.79992824	1.056706764	0.765088677
22.5	0	0.995230298	0.581660801	12.00738268	12.85246338	1.039069254	0.771775758
23	0	0.99780577	0.581407733	12.46529468	13.03608218	1.045495622	0.764404753
23.5	0	0.99664687	0.582552342	12.56380536	12.79990724	1.037333472	0.805875925
24	0	0.998934794	0.583671199	12.47253015	13.21669324	1.042506135	0.768399603
24.5	0	0.997758463	0.584131891	12.44025039	14.40495173	1.016801145	0.748107293
25	0	0.99928009	0.580167985	12.18273243	13.67528736	1.037497832	0.753221762
25.5	0	0.996282101	0.580008574	12.65802905	13.51411953	1.007073872	0.75028587
26	0	0.995070779	0.577937969	12.8857328	13.88759561	1.003704867	0.749520924
26.5	0	0.993875685	0.578393997	13.0172106	13.78611305	1.001837735	0.76079102
27	0	0.993601068	0.577153733	13.59024583	14.83282066	0.989698856	0.736602844
27.5	0	0.990894366	0.578497393	13.80096143	15.44866546	1.018582631	0.737099413
28	0	0.996194294	0.580388986	13.45124452	14.31961535	1.000304228	0.733437563
28.5	0	0.990498945	0.579119887	12.94735472	14.39871168	1.011339448	0.74221203
29	0	0.988818767	0.579779766	13.83355994	14.51231354	1.014752253	0.778542055
29.5	0	0.989563912	0.57924446	13.38980835	13.7266284	1.030885885	0.800491307
30	0	0.96911744	0.566677346	13.17743342	14.81084031	0.956292493	0.701977226
30.5	1	0.822155785	0.515190137	13.95708864	14.91842522	0.686078448	0.521909728
31	1	0.716542253	0.485044317	16.5754825	16.33372983	0.5738295	0.441157474
31.5	1	0.720071068	0.499199013	22.87985304	20.33770667	0.576997468	0.459657755
32	1	0.74956436	0.520483266	23.98698615	19.06959106	0.578673376	0.454031694
32.5	1	0.786422672	0.532512629	24.68989248	18.32961103	0.603328202	0.499038256
33	1	0.817509443	0.54259575	24.40380091	17.63941545	0.647428701	0.542428152
33.5	1	0.833881662	0.547878347	25.07603876	18.86919288	0.666264433	0.599826594
34	1	0.845738385	0.545000429	25.04826943	19.49906388	0.708908488	0.584240276
34.5	1	0.8555344	0.545423052	24.92117341	19.49105092	0.715139657	0.549519338
35	1	0.859415903	0.547181624	23.6560495	20.16447496	0.731793516	0.559910044
35.5	1	0.861644108	0.546568092	22.60626516	18.75016297	0.740130379	0.580118775
36	1	0.867410151	0.547350908	22.06296331	19.99647863	0.723791529	0.570160046
36.5	1	0.872381385	0.549863573	20.01829845	17.80141595	0.756199278	0.595838549
37	1	0.876629977	0.55499484	19.79710433	18.09642767	0.786360402	0.622874787
37.5	1	0.879825126	0.554643063	19.49180924	18.64772722	0.795152207	0.640109788
38	1	0.884194723	0.553814995	20.32843658	19.78269427	0.793345773	0.651760304
38.5	1	0.887925279	0.55602548	19.75287609	19.39987113	0.811544873	0.628415731
39	1	0.890946328	0.556887104	19.51328987	19.16691851	0.793818174	0.602577839
39.5	1	0.893121677	0.556928019	20.22397103	20.73159678	0.81199332	0.627041294
40	1	0.900721754	0.555319156	19.48763317	20.09918939	0.791353744	0.616831387
40.5	1	0.904047399	0.558934024	19.54878706	19.94567501	0.792598376	0.609383837
41	1	0.906563073	0.559384158	20.63512973	21.03956528	0.832614245	0.643275251
41.5	1	0.915046062	0.563167582	19.6071709	20.11837369	0.819905699	0.627864475
42	1	0.918664108	0.563481379	19.35458749	21.18279308	0.790006079	0.612051627
42.5	1	0.919006099	0.564886689	20.12938967	21.82030103	0.808052348	0.626872441
43	1	0.922755389	0.566084974	19.97063158	21.12693707	0.824393323	0.627444284
43.5	1	0.923370575	0.566000331	19.2873099	20.22715041	0.842519642	0.606343299
44	1	0.926261358	0.566220813	20.17402498	21.20510146	0.821290545	0.62074243
44.5	1	0.929830261	0.565601517	19.54817576	20.9504681	0.838445441	0.635859715
45	1	0.931578228	0.567959529	18.92703065	20.67716365	0.841616891	0.660818873
45.5	0	0.943666881	0.573797265	19.32613551	21.25569097	0.896212644	0.722443136
46	0	0.968832876	0.581877015	18.04258107	19.73144328	0.961355688	0.788252934
46.5	0	0.990795475	0.586421332	17.12844921	18.67214522	1.0294547	0.803561042
47	0	1.01265653	0.59233119	16.28757883	17.67630419	1.079340911	0.830656187
47.5	0	1.022613396	0.594890395	15.74775019	17.95713696	1.092424387	0.843199284
48	0	1.028094774	0.596312441	15.60597305	19.49417212	1.144527455	0.847029781
48.5	0	1.032431726	0.595833169	15.08235369	18.89022107	1.119125073	0.841750653
49	0	1.031165553	0.592197318	13.9628338	16.7305225	1.121346911	0.815050498
49.5	0	1.029202664	0.591831953	13.7116064	16.05438775	1.098927104	0.766210034
50	0	1.032110031	0.5914813	13.04786288	15.37163333	1.107588415	0.772486863
50.5	0	1.032156247	0.593558573	12.76213383	14.91640379	1.107280014	0.791804216
51	0	1.030720743	0.593001672	12.57432596	14.75698169	1.135781104	0.813045793
51.5	0	1.030671507	0.58979553	11.7376384	13.79488848	1.12341244	0.815498253
52	0	1.031494186	0.590322124	12.61737587	16.08123518	1.150740163	0.833935922
52.5	0	1.03269363	0.589473772	11.93937642	14.21993728	1.154933926	0.822750716
53	0	1.032696809	0.588631584	11.61096303	13.19462977	1.151820806	0.813157818
53.5	0	1.031745756	0.592742195	11.00435848	13.01343184	1.124827885	0.828013877
54	0	1.034362034	0.596653836	11.74286386	15.45070183	1.171214887	0.825090627
54.5	0	1.029025563	0.591590376	11.94839337	16.16343915	1.138059312	0.815846092
55	0	1.028222804	0.590109582	11.30957623	13.65832225	1.10435348	0.799636126
