# Supplementary material for: Circuits for integrating learned and innate valences in the insect brain
Source: eLife journal article supplement (doi:10.7554/elife.62567), 2021-11-10
Supplement: supp [file elife-62567-supp-v1.zip › elife_poa_e62567_Figure_3_source_data_1.csv]

Value angles showing turn responses of animals during activation of Or42b with or without functional MB
Mean and std values of the turn angles over time in the different experimental groups shown in Figure 3g.
time_interval	stim_ON	no_ORN_stim__mean	no_ORN_stim__std	ORN_stim_Effector_ctrl__mean	ORN_stim_Effector_ctrl__std	ORN_stim_Gal4_ctrl__mean	ORN_stim_Gal4_ctrl__std
20	0	1.021601552	0.526732522	16.44403307	17.16298552	0.985486775	0.555916398
20.5	0	1.013433873	0.535024523	16.09304266	16.08229898	0.987818941	0.574532079
21	0	1.021120034	0.525882279	16.75526775	18.13709125	0.980599808	0.554636905
21.5	0	1.007980363	0.533283347	16.50260465	17.5013622	0.981667635	0.550155985
22	0	1.006168057	0.507691695	16.02335925	18.12451755	0.989194003	0.528964504
22.5	0	0.9967545	0.514489846	16.04873306	18.63900697	0.976209535	0.525251845
23	0	0.988508	0.511762033	16.49828049	17.94188103	0.992526599	0.525167727
23.5	0	1.013083782	0.511202494	16.88983705	19.69791503	0.964599305	0.521118773
24	0	1.022370537	0.511118909	16.441429	19.85859118	0.989595	0.520596647
24.5	0	1.022731866	0.538990387	16.1411415	17.36431499	0.9782585	0.55894398
25	0	1.036075792	0.555296818	16.65612556	19.06404411	0.97086224	0.541248736
25.5	0	1.015964737	0.535778276	16.28378544	16.37904665	0.992555293	0.534711083
26	0	1.021587621	0.532664457	17.14536818	18.11250976	0.982740605	0.551870488
26.5	0	1.017201109	0.530914768	17.23602855	17.97107991	0.999122651	0.545125206
27	0	1.004854446	0.531025134	17.3170828	18.56693513	0.973331063	0.535874871
27.5	0	1.007693328	0.532235961	16.948429	17.82558985	1.022272435	0.540865122
28	0	1.012681606	0.51463243	16.62365869	17.18341803	0.989034344	0.513686533
28.5	0	1.015582722	0.515425183	15.88238185	16.13982043	0.987293243	0.550233399
29	0	1.009059285	0.513510096	15.79999079	16.50772383	1.001575895	0.530681065
29.5	0	1.013445847	0.528749269	15.15579038	16.2240363	0.997865996	0.541661346
30	0	1.007983124	0.520837455	15.28215212	15.59903448	1.0031226	0.532937201
30.5	1	0.876710582	0.463598496	15.34757929	15.04159569	0.924394165	0.537782991
31	1	0.760750595	0.433684419	17.19593994	19.06480641	0.857128181	0.52479601
31.5	1	0.746465317	0.428161167	19.7683202	19.23104776	0.834349838	0.529154936
32	1	0.781890207	0.44974999	21.06136742	19.03198022	0.867021547	0.540986438
32.5	1	0.831421313	0.475200409	20.98759919	18.50713269	0.897672086	0.513655767
33	1	0.854166901	0.471387187	19.65911558	18.2235616	0.934644811	0.511751609
33.5	1	0.889167371	0.494649739	18.86644267	18.24372964	0.930699146	0.522740977
34	1	0.882885659	0.492993899	18.28998621	17.75843443	0.95815123	0.53712589
34.5	1	0.903462018	0.488386134	18.59350916	17.36181332	0.942991581	0.522320982
35	1	0.906760163	0.481254032	17.24627349	17.54842308	0.943977029	0.531052116
35.5	1	0.916876915	0.485243599	16.66857127	16.9262008	0.987750801	0.548198805
36	1	0.908885169	0.482441294	16.5165963	17.50478479	0.964017323	0.513284189
36.5	1	0.903300075	0.486154551	16.74196936	17.71903187	0.941063674	0.511768314
37	1	0.909637286	0.471948281	16.72286266	18.08311906	0.958770331	0.537953675
37.5	1	0.908565819	0.486382455	17.80943539	20.2504213	0.950570212	0.527717903
38	1	0.950093869	0.490998515	17.31824664	18.32463096	0.980583547	0.520950279
38.5	1	0.941849258	0.502399058	17.50437306	18.82235372	0.969838399	0.578270783
39	1	0.9347545	0.494024165	16.63914409	18.78148265	0.963575274	0.526762049
39.5	1	0.935345393	0.493773443	16.2816439	17.64171951	0.971038635	0.537961405
40	1	0.937965305	0.504466508	16.45362229	17.84621063	0.958157663	0.528578592
40.5	1	0.942589898	0.509927398	15.79250534	16.66827404	0.960406632	0.537295245
41	1	0.952745635	0.50589538	15.88846183	17.54185994	0.981064858	0.528110178
41.5	1	0.962326387	0.523742095	16.03178048	16.83511208	0.968556837	0.538569079
42	1	0.96762308	0.512244182	15.71037026	15.95657749	0.954969681	0.527009659
42.5	1	0.949691796	0.499667385	15.52751694	16.07715758	0.994906517	0.524015527
43	1	0.939714028	0.49396879	15.3410107	16.01344077	0.97053597	0.510587624
43.5	1	0.960241805	0.511027014	15.28130079	16.59171618	1.007164491	0.536619011
44	1	0.961182043	0.513312528	14.54407828	14.99993723	1.003715047	0.505954303
44.5	1	0.969757544	0.504297184	14.59127202	15.10258323	1.00301593	0.5413619
45	1	0.971835063	0.528501226	14.31767515	15.79123427	1.002060602	0.546135406
45.5	0	1.001751821	0.537634519	15.07711558	16.27643472	0.99410719	0.527173998
46	0	0.99566517	0.524956869	15.00764485	16.32669224	0.979181185	0.540641079
46.5	0	1.019104721	0.545309789	15.47264596	17.34733774	0.988935647	0.561453111
47	0	1.026120593	0.530306469	15.76631839	17.09888446	0.968294757	0.541017571
47.5	0	1.047166678	0.532871307	16.03668599	16.94522366	1.006070869	0.538422731
48	0	1.029061228	0.539821164	15.49922687	17.38019415	1.002814243	0.542209805
48.5	0	1.039610549	0.535207542	16.2140465	17.3264938	0.966329839	0.549433352
49	0	1.029086956	0.528802177	16.76254438	17.7337707	0.959192687	0.538741015
49.5	0	1.047191028	0.55371742	17.23605577	18.77839939	0.970726985	0.525842777
50	0	1.03991001	0.542112007	16.97754536	18.30947703	0.953576065	0.529958259
50.5	0	1.042687993	0.541977523	16.73113078	17.69947531	0.967276481	0.527783163
51	0	1.036220696	0.549732774	17.16568095	18.96205649	0.969400112	0.526649391
51.5	0	1.043591727	0.532259423	17.43526936	17.5609735	0.975086918	0.516935686
52	0	1.026871031	0.529901531	18.03637223	18.17466075	0.959950568	0.527385752
52.5	0	1.045563844	0.524629724	16.80074989	16.65476694	0.97114579	0.528172832
53	0	1.035324017	0.542858428	16.80257678	17.76404036	0.995648498	0.547310478
53.5	0	1.057021934	0.534350095	16.21022698	16.55818832	0.968704576	0.5427989
54	0	1.038039813	0.540591243	16.63401615	17.11667761	0.973893142	0.524280363
54.5	0	1.04444254	0.547158564	16.72567034	17.45128899	0.963936727	0.535368705
55	0	1.039216068	0.526434893	17.72609691	19.65054383	0.965744434	0.530751176
