# Supplementary material for: Circuits for integrating learned and innate valences in the insect brain
Source: eLife journal article supplement (doi:10.7554/elife.62567), 2021-11-10
Supplement: supp [file elife-62567-supp-v1.zip › elife_poa_e62567_Figure_4_source_data_1.csv]

Individual GCaMP fluorescence values in response to odour presentation by MBON-m1 of animals with intact olfactory pathway
Fluorescence values of the selected ROI over time for each repeats and each individuals as plotted in Figure 4c (left panel).
	indiv1_		indiv2_		indiv3_		indiv4_		indiv5_				indiv6_				indiv7_				indiv8_				indiv9_		indiv10				indiv11				indiv12
time (s)	repeat_1	repeat_2	repeat_1	repeat_2	repeat_1	repeat_2	repeat_1	repeat_2	repeat_1	repeat_2	repeat_3	repeat_4	repeat_1	repeat_2	repeat_3	repeat_4	repeat_1	repeat_2	repeat_3	repeat_4	repeat_1	repeat_2	repeat_3	repeat_4	repeat_1	repeat_2	repeat_1	repeat_2	repeat_3	repeat_4	repeat_1	repeat_2	repeat_3	repeat_4	repeat_1	repeat_2	repeat_3	repeat_4
0	0.038797043	0.111933462	-0.037074763	-0.00071759	0.10175793	0.206308628	-0.323957733	0.165721228	NaN	NaN	NaN	NaN	NaN	NaN	NaN	NaN	NaN	NaN	NaN	NaN	NaN	NaN	NaN	NaN	NaN	NaN	NaN	NaN	NaN	NaN	NaN	NaN	NaN	NaN	NaN	NaN	NaN	NaN
0.2	0.108808896	0.153971305	-0.08704079	0.017978559	0.005014776	0.054971503	-0.273021237	0.259032564	0.219741279	-0.081212026	0.152810841	-0.043836471	-0.438114679	0.161417166	-0.282050048	0.041692639	0.041998519	0.058294353	0.128853522	0.136622325	0.048063191	-0.004841394	-0.068425881	0.040493958	0.15663575	0.007270707	-0.014045171	0.307028369	-0.087557228	0.143482015	-0.001092341	-0.003349634	0.005107449	-0.081865673	-0.034857757	-0.035944111	-0.256164478	-0.004766362
0.4	0.047420385	0.14328932	0.016489998	0.029507073	-0.04713984	0.236196674	-0.196975051	0.052010896	0.054832719	0.024911516	0.016080301	-0.037443259	-0.537620927	0.126470386	-0.112428948	0.019634637	0.158241627	0.101041904	0.135071762	0.072944452	0.055011737	-0.098312194	0.028324257	-0.014022612	0.16138623	-0.14681716	-0.043306163	0.028722649	-0.171711265	0.063989608	-0.027369179	-0.060066439	-0.017974279	0.017252066	-0.233736898	-0.217332516	-0.167457683	-0.221220428
0.6	0.00840002	0.061788173	0.012199954	0.065786033	-0.088767169	0.109952494	-0.126021424	0.046157512	-0.034080549	0.095281444	-0.071006051	0.025232144	-0.371987384	0.166242747	-0.120778484	-0.077218316	0.135052337	0.018654893	0.054162626	-0.038911825	0.041470624	-0.034510952	-0.022319595	0.033857287	0.137857706	-0.155483908	0.055115737	0.087390263	-0.062790584	0.119321153	-0.062349706	-0.077622946	-0.028931279	-0.069436041	-0.341153824	-0.359497485	-0.304394438	-0.179603878
0.8	-0.07543685	0.065152233	-0.007584697	-0.022418349	-0.066038588	-0.033119716	-0.168187877	0.028811632	0.098568927	0.151961398	-0.028447939	0.022514481	-0.477570867	0.268637011	-0.240227428	-0.133954586	0.057052954	0.012576314	-0.024818099	0.031418756	0.087286651	-0.072573212	-0.017512794	0.032217556	-0.043088456	-0.064558907	0.021741533	-0.081949505	-0.000602171	0.121420981	0.052045007	-0.016392823	0.08296202	0.016216188	-0.195583268	0.133057924	-0.088043718	0.011716981
1	-0.0728722	0.063398404	-0.014225869	0.107435702	-0.150957874	-0.033279371	-0.200808999	-0.124114673	0.329684034	0.015963354	0.086159976	0.146726592	0.000941322	0.266226218	0.00282797	-0.044688165	0.051224229	0.033769101	0.02738092	0.112049303	0.076650941	-0.007198332	0.086355206	-0.024188785	-0.078956852	0.051125197	0.00895704	-0.05480315	-0.046753267	0.108545553	-0.049657422	0.018545909	0.007060499	0.033823774	-0.435168575	0.744733714	-0.353649662	0.173372256
1.2	-0.172374333	0.044492811	-0.005285421	0.065441302	-0.165551718	-0.120837996	-0.223503486	-0.08965647	0.179349013	0.064569911	0.113522796	0.145676055	0.133147202	-0.121927657	0.170128919	-0.057784957	0.004143526	0.096229561	-0.07421084	0.092819074	0.083459816	-0.008709807	0.102597842	-0.033424059	0.031265563	0.029539907	-0.020794556	0.175264919	-0.110025596	0.246397079	-0.018178428	-0.03668612	-0.009884695	0.039647828	-0.322088189	0.272862197	-0.300022396	0.18696181
1.4	-0.021569466	0.113243633	0.134008446	0.061045663	-0.229629868	-0.020895827	-0.184129397	-0.052365697	0.042412891	0.249082312	0.06908522	0.208358665	0.153267801	-0.09865417	0.04135505	-0.068279612	0.021847667	0.069579903	-0.040300325	0.066189533	0.080713824	-0.026522602	-0.060217793	-0.07623503	0.05693676	0.02576913	0.143287443	0.239034346	-0.03865518	0.150636031	-0.044485438	-0.04614052	0.008416456	-0.036825528	-0.176515479	0.371409073	0.028148778	-0.027428483
1.6	-0.114095543	0.092294614	0.009649775	0.080967909	-0.116910472	0.008009985	0.055313909	-0.082907235	-0.047216359	0.143525357	0.062505115	0.150027798	0.101001397	-0.168989844	-0.106841953	-0.069728397	0.07081497	0.038537423	-0.075245412	0.027640144	0.006451787	-0.005672368	-0.134444281	-0.077494454	-0.059939381	0.029376843	0.031224857	0.079200204	-0.07346999	0.027078263	0.067266736	0.050132688	0.02378687	0.002004258	0.013099228	0.705594567	0.117359759	0.212371446
1.8	-0.099666614	0.037956336	0.010759909	0.081141129	-0.222807454	-0.003427366	0.328691461	-0.064973937	0.113122494	0.083903461	0.035019729	0.06216376	-0.079208713	-0.110234381	0.22235427	0.088221705	0.046984785	-0.004362331	0.000157886	0.009613476	-0.003419018	-0.066879853	-0.144203473	-0.051051441	-0.047648116	0.113198699	0.11284264	0.001261457	-0.038815059	0.03936493	0.021646539	0.060614992	0.030608643	0.004029137	0.090655785	0.155288945	-0.014251777	0.224603509
2	-0.115187229	-0.00859988	0.046866593	-0.033361855	0.006972021	0.18132506	0.307933786	0.118583472	0.311768938	-0.019859996	0.131064026	-0.079646243	-0.194669494	0.066412382	0.164133515	0.181677672	0.003042953	-0.025234781	-0.06885377	-0.032621092	-0.03785162	-0.091072982	-0.146901754	0.025299206	-0.097204053	-0.063271689	0.041559269	0.100379142	-0.101652587	0.027687918	-0.043979553	-0.004648852	-0.022555647	-0.013197783	0.217588488	-0.097182417	0.067700485	0.099483668
2.2	-0.133963615	0.09261035	0.035117623	-0.011645939	-0.074510753	0.061054853	0.309177895	0.144646545	0.221064249	-0.020329155	0.124360223	-0.038267126	-0.103678062	0.165542846	0.176992702	0.232152058	-0.002583626	-0.035638827	-0.095536114	-0.048788876	-0.033716072	0.001190187	-0.147206234	0.053558019	-0.114929555	0.021912117	0.016603783	0.021364053	-0.104912694	-0.031676033	-0.05733821	0.033904639	-0.00143993	0.014029694	0.445839342	-0.167162976	0.224040277	0.068531973
2.4	0.040536331	0.011447322	0.053103488	0.004357348	0.029483774	0.12141568	0.119383872	0.092261891	0.086071526	-0.028999373	0.031219193	0.011285734	-0.174998958	0.052471775	-0.029106892	0.083372822	-0.026203299	-0.066812919	-0.05875155	-0.055733684	-0.007112958	0.035925932	-0.115751412	-0.010427223	-0.05746201	0.056562145	0.016909828	-0.146805076	-0.095839805	-0.106194003	-0.059509838	0.045250678	0.009398174	0.005559546	0.382815854	-0.316006317	0.161442312	0.029436662
2.6	-0.020085677	-0.050124419	-0.044975902	0.037255331	0.131027763	0.162236534	0.13921812	0.098265486	-0.055970509	-0.072142413	-0.046115006	-0.017147145	-0.180865755	0.126757518	-0.097947363	0.052132404	-0.027945185	-0.016012216	-0.046501359	0.002862413	-0.019529265	0.031045223	-0.155225415	-0.009191943	-0.113138211	0.089515583	0.14140168	0.046374259	0.000245413	-0.034898569	-0.016383676	0.07381667	-0.026309836	0.023590489	0.084134348	-0.300463288	-0.001971459	0.024192625
2.8	-0.000396183	-0.118772917	-0.075448804	0.025005512	0.165688382	-0.118939453	-0.015863649	-0.012771718	-0.002620457	-0.032034099	-0.011482891	-0.035737316	0.005704903	0.178920184	-0.147001742	0.118132285	-0.043521341	0.03057719	-0.022338702	0.055561452	-0.018099701	0.040629276	-0.158201501	0.017156741	-0.015619295	0.183209962	0.011790662	0.258576708	0.057421653	0.059870595	0.00380706	0.090365068	-0.054863903	0.053181693	-0.003248155	-0.104895523	-0.116400807	-0.045295338
3	0.23536589	-0.062231252	-0.087262219	0.006305876	0.180243641	0.028906516	-0.045807972	-0.146356969	-0.048385261	0.046102464	-0.030763593	-0.007285892	0.331178277	-0.030089834	-0.035067861	-0.035164333	-0.093310306	0.035156263	-0.07968139	0.011742277	-0.030052532	0.013947034	-0.036631467	0.075221352	0.078664372	0.068232329	-0.094978616	0.173602749	0.105745132	-0.010802433	0.007650236	-0.024563137	-0.047911949	0.013815522	0.004698618	0.205533382	-0.15226135	0.057926936
3.2	-0.036014938	-0.111471688	-0.050968594	0.023774293	0.227945779	-0.158165366	-0.095278521	-0.022641815	-0.212553542	0.019552907	-0.074728787	-0.03061976	0.226536519	-0.014848365	-0.00012616	-0.141911625	-0.090353001	0.026110769	-0.08558101	0.011232705	-0.038798498	0.020989713	0.110729036	0.146832161	0.015999647	-0.081041135	-0.050249578	0.07598252	0.10753363	-0.055319215	0.063607872	-0.080710404	-0.022179596	-0.034125212	0.204700655	0.229624799	0.042149226	0.147345164
3.4	0.03498464	0.053012034	-0.087270448	-0.03214785	0.118022347	-0.131507423	-0.02537096	-0.043376343	-0.13667113	0.021202756	-0.046761398	-0.06189164	-0.07765712	0.133891391	-0.091605133	0.022587547	-0.042817727	0.035303748	-0.011073798	-0.011225324	-0.038662173	0.01755622	0.137303126	0.119401047	0.00287741	-0.043652123	-0.066947851	0.03854719	0.095172995	-0.013078238	0.131328245	-0.044772353	0.040374799	-0.02443582	0.208843443	-0.042449275	0.0029423	-0.037839963
3.6	0.115502355	-0.006742187	0.022226522	-0.078021248	0.065754378	-0.114487761	0.15329024	0.038580021	-0.079655736	-0.039534238	-0.048726194	-0.080814325	0.033243181	-0.074078011	-0.025030318	0.187058688	-0.00473998	0.038201876	0.02114038	-0.100701654	-0.029386334	-0.010955491	0.143611532	0.048947684	-0.043598281	-0.012485988	-0.055254596	-0.050512007	0.072574115	-0.015440241	0.056620554	-0.041404694	0.024100465	-0.008719911	-0.123717671	-0.156804431	-0.221968067	-0.226696363
3.8	0.145337336	0.020545024	-0.018835633	-0.05179843	0.109554182	-0.027088487	0.139395134	-0.023594525	-0.161719138	-0.1781859	-0.094893659	-0.07311563	0.243784778	-0.297016749	-0.010865559	0.027294685	0.004415854	-0.027940188	0.044109678	-0.108201711	-0.001247133	0.020594207	0.134615508	0.033516387	-0.113531336	-0.03401085	-0.068491615	-0.014866925	0.053074024	-0.024892423	0.002210241	-0.048194994	-0.034845165	-0.029067174	-0.2968242	-0.092682549	-0.25971518	-0.236409901
4	0.053520013	0.030166668	0.040162045	-0.056802636	0.001981896	-0.132277481	0.253334622	-0.03703119	-0.126075221	-0.171635444	-0.086844856	-0.020998845	0.282233838	-0.157877144	-0.03307121	-0.161297021	-0.013664368	-0.098139292	0.071142648	-0.077442881	-0.018191649	0.053109372	0.068550853	0.01612623	-0.115751291	0.018379933	-0.099283194	-0.019079407	0.108441055	-0.043216324	0.0233941	-0.02484696	-0.015292093	-0.009934856	-0.080224397	-0.266212418	-0.057411774	-0.240044526
4.2	0.122126675	-0.119966767	-0.032091605	-0.069217415	0.00758258	-0.210532649	0.116717409	-0.094492827	-0.141807648	-0.202553828	-0.04542144	-0.026232837	0.279392635	0.101018419	0.043768527	-0.082570891	-0.056363485	-0.116323106	0.030829483	NaN	-0.071407894	0.033571408	0.039547127	-0.032665151	-0.067872003	0.034006651	-0.034799978	-0.256646912	0.108991614	-0.119039737	-0.010008361	0.053020078	-0.01930214	0.075324275	0.276339286	-0.291874016	0.317104121	-0.230595243
4.4	-0.043459398	-0.231783076	0.054805712	-0.066950573	-0.158322457	-0.056564649	0.116677097	-0.19618952	-0.24869228	-0.22640481	-0.071843648	-0.039271428	0.269914763	0.12702281	0.097169384	-0.039152579	-0.102368614	-0.119144866	-0.016071806	NaN	-0.088523736	0.00605232	0.021738976	-0.077839377	0.106492831	-0.063638695	0.032777533	-0.393930956	0.091638062	-0.199629745	0.033306971	0.091552839	-0.012658529	0.080045352	0.197954465	0.045166873	0.378365779	-0.097317178
4.6	-0.163099955	-0.087217341	0.039275702	-0.146482895	-0.102627488	-0.033833906	0.269285608	-0.191545972	-0.219387845	-0.045380174	-0.091930426	-0.057851585	0.213025183	-0.108210774	0.152096331	0.000635524	-0.071315891	-0.086589868	0.069931484	NaN	-0.054138174	0.035302174	0.110047282	-0.098047294	0.110849454	-0.036944362	0.030897517	-0.390767905	0.086002768	-0.21884259	-0.002597585	0.023288875	0.017555938	-0.004908265	0.018646189	-0.116816186	0.385402634	-0.025629796
4.8	0.1761509	-0.188641572	0.164791182	-0.109393034	-0.122006426	-0.128482825	-0.002881426	-0.17718228	-0.126058136	0.087570423	-0.044596658	-0.084379301	0.155832334	-0.29279788	0.156188598	-0.0552969	-0.020529418	-0.01867908	0.096789471	NaN	0.00137949	0.077692872	0.144327057	-0.068821294	0.021374407	0.069680177	-0.097426614	-0.200123357	0.025636737	-0.142718748	-0.03503616	-0.014129565	0.02875937	-0.031418124	0.063341548	-0.157912602	0.390040804	0.130409869
5	0.222941782	-0.043619039	0.135984995	-0.070365905	0.020830646	-0.048677902	-0.030704676	-0.094095878	-0.007612534	0.124255095	-0.037384991	-0.065877421	0.182914782	-0.632440031	0.135022483	-0.125627723	0.006331119	0.033500481	0.057791963	NaN	0.007392567	0.053861674	0.144794	-0.077031611	0.098784282	-0.033991756	0.001673701	0.038185766	0.039536891	-0.094875614	-0.024643518	-0.006653505	0.013494808	-0.020800615	-0.005798419	-0.327827475	0.207433643	0.197725119
5.2	0.26771225	-0.056514341	0.111860143	-0.082905456	0.097547197	0.11289002	-0.108279737	-0.101923942	0.01365393	0.080000619	-0.049441435	-0.072582413	0.015631807	-0.464802542	0.193716818	-0.045719506	0.037916281	0.02888619	0.12881139	NaN	-0.010414242	0.037898463	0.266988931	0.003771554	0.030952344	0.168252765	0.033185505	0.174451256	0.064563054	-0.01671559	0.047039646	0.063696229	-0.045465825	0.032902529	-0.218263498	-0.470848122	0.175599111	0.015360945
5.4	0.068770902	-0.116613027	0.131526846	-0.084523552	-0.021891707	-0.031692079	-0.084812178	-0.145048639	0.00999175	0.166884178	-0.038037609	0.01615218	0.171164287	0.043463105	0.256320661	0.1551958	0.13739768	0.015400574	0.217789575	NaN	0.009795545	0.054910953	0.31041341	0.079199319	0.153069191	-0.031241064	-0.135369011	0.035848047	-0.004081611	-0.085123227	0.071390525	0.108879015	0.020503823	-0.038848016	-0.20832184	0.033176439	0.33772143	0.220762589
5.6	-0.108109945	0.036198408	0.242317345	0.01443397	-0.044947666	-0.069679638	-0.212395837	-0.204398113	-0.115706154	0.206634459	-0.067379925	0.098373117	-0.035785799	0.047648858	-0.187259497	0.201266866	0.157343501	-0.013976922	0.32447193	NaN	-0.010438086	0.008256088	0.333305513	-5.07E-05	0.206256336	-0.075072077	-0.240692081	-0.152563708	-0.105325297	-0.175228464	0.145982564	0.088964873	0.107730805	0.04707936	-0.034591147	0.021809474	0.22942312	0.380584977
5.8	-0.012679974	0.104796259	0.335018327	0.190930747	-0.187572215	-0.10004415	-0.152147911	-0.242733152	-0.097512918	0.222993172	-0.078814898	0.15031297	0.122429038	-0.021378674	-0.193784663	-0.089346526	0.192412659	-0.044349478	0.339109919	NaN	-0.004455497	-0.068629796	0.319094041	0.046067033	-0.022525346	-0.059876447	-0.257236896	-0.248461897	-0.121336873	-0.251145347	0.205374695	0.11081126	0.087987091	0.116616716	0.292855879	0.110816167	0.482954076	0.333067402
6	-0.069160662	0.323809329	0.347791889	0.330329903	-0.103260262	-0.211664955	-0.27669058	-0.229677087	0.122330059	0.036180451	-0.013728066	0.121319174	0.082348504	-0.161383541	-0.20068085	-0.142519648	0.182056783	0.015819214	0.332034785	NaN	0.073736718	-0.106821299	0.314009775	0.004421615	-0.093168173	-0.094333129	-0.267694186	-0.272367479	-0.138028781	-0.282193506	0.220896497	0.103863908	0.071761381	-0.018169979	0.003927067	0.263332096	0.07953743	0.305883563
6.2	0.109644314	0.36421217	0.421517328	0.378903542	-0.066375944	-0.183643175	-0.159961497	-0.359614237	0.209931265	0.183285864	0.070938558	0.232064831	0.021384778	0.028556285	-0.234242811	0.005451951	0.248250842	-0.050098586	0.287180218	NaN	-0.012261486	-0.110409668	0.339604981	0.040812024	0.174750385	0.082666067	-0.347577279	-0.143914519	-0.213155593	-0.334881862	0.109643846	0.069840364	0.131398053	0.090064912	-0.043720837	0.245635335	0.311486713	0.307616982
6.4	0.142235289	0.533277816	0.412227606	0.419794276	0.055391037	-0.186515715	-0.051388642	-0.077106311	0.094739646	0.213438692	-0.000105214	0.222885494	0.445855165	0.040088567	-0.213386097	-0.11854496	0.314988186	-0.010669207	0.339411924	NaN	0.003144667	-0.041767931	0.511625125	0.122244951	0.14722603	-0.118523829	-0.436762946	-0.10740986	-0.281375119	-0.239223951	0.234848615	0.060599652	0.066191779	0.029729065	0.24779494	0.150007215	0.275117255	0.372418256
6.6	0.312966626	0.461106667	0.449917441	0.406234428	0.081921011	-0.173819572	0.046316734	-0.106255501	0.061876872	0.125879501	0.001784152	0.311240169	0.54976107	0.198805986	-0.077663666	-0.18857542	0.278932811	0.08237789	0.268493718	NaN	-0.001065484	-0.075102975	0.450531395	0.051897041	0.091276366	-0.131784943	-0.359078519	-0.016964049	-0.249680809	-0.21080059	0.191000548	0.051882039	0.08908493	-0.017726077	-0.070693604	-0.146960051	0.284748294	0.265298331
6.8	0.221752716	0.330077152	0.426136763	0.463686288	-0.09624592	-0.09529675	-0.025499525	0.04309017	0.003184232	-0.05192726	-0.06264253	0.154810453	0.237121942	0.196486012	-0.169695174	-0.167899067	0.286154262	0.109008593	0.330660293	NaN	0.031545358	-0.070929022	0.460932925	0.013013879	-0.019121505	-0.004605499	-0.002838512	-0.168434925	-0.066898871	-0.295754719	0.181180233	0.100692421	0.103623085	0.132148487	-0.176998174	0.355206452	0.440578801	0.330719816
7	0.499991757	0.245898353	0.560304047	0.514772832	0.054248455	-0.228072834	0.002350638	-0.027226483	-0.071037145	-0.033205422	-0.098890312	0.144780878	0.745361206	-0.217858298	0.345840226	-0.489829724	0.226913878	0.090625428	0.286008126	NaN	0.000266172	0.038747136	0.338020841	0.113484054	-0.073566608	0.103801653	0.024790872	-0.307147991	-0.069257476	-0.357911135	0.255914958	0.07056088	0.187987782	0.019448382	-0.021348974	-0.358675922	0.570626052	0.208953745
7.2	0.658362546	0.420342594	0.492670556	0.412138682	-0.060453242	-0.172105	0.401489545	-0.004890516	0.093395865	0.067967244	0.137701382	0.224573299	0.755017147	-0.24773625	0.498846368	-0.259841489	0.283720332	0.119311072	0.3697269	NaN	0.012102208	0.026141241	0.38349078	0.084053622	0.063802626	-0.129275606	-0.271605077	-0.002744768	-0.079450212	-0.164019417	0.228506125	0.031138115	0.123715041	0.102199145	0.053698901	0.085526805	0.402784832	0.32327114
7.4	0.433594002	0.481291261	0.401883986	0.489610749	-0.054578578	-0.167393085	0.18158359	0.111916769	0.100857692	0.554511111	0.174709832	0.339635266	0.605900609	0.434107294	0.407762038	-0.108132016	0.362358383	0.064437062	0.430593019	NaN	0.073739737	-0.041231029	0.42864734	-0.002623873	-0.047257405	0.012395571	-0.072003996	0.002640439	-0.148403636	-0.269440615	0.211606673	0.088527564	0.142025644	0.093546755	-0.223295245	-0.066436481	0.264191749	0.245998506
7.6	0.488826684	0.427891401	0.426032879	0.389637798	-0.093097371	-0.182009321	0.164964336	0.020781718	0.205431427	0.52429185	0.128640497	0.326727533	0.535783476	0.116655818	0.254455013	-0.288276855	0.37569153	0.070172367	0.319864581	NaN	0.018677454	-0.09771806	0.508860045	-0.006074039	-0.024672636	-0.125554334	-0.248488377	0.113790389	-0.159902216	-0.198332463	0.209366964	0.147520466	0.10972807	0.113276455	-0.214833101	0.288357806	0.234206882	0.381532279
7.8	0.462286292	0.396106119	0.457968326	0.477876706	-0.153787567	-0.130882403	0.075068032	0.13150405	0.272567783	0.54761065	0.152137765	0.266635224	0.261422867	0.19211847	0.252275584	-0.203853598	0.367545615	0.119989388	0.288763411	NaN	-0.028672809	-0.122289869	0.423707126	0.054896359	0.006699541	-0.162740989	-0.539049885	-0.177747133	-0.213938346	-0.231194082	0.164462799	0.066227344	0.143262314	0.098404808	-0.28648241	0.415668924	0.095590263	0.497168485
8	0.470507021	0.50528645	0.42279135	0.418452304	-0.205770843	-0.125971004	0.087246136	0.068005508	0.244821539	0.53887776	0.102471581	0.314165195	0.481982284	0.163197636	0.328869549	-0.135423701	0.370556419	0.06728542	0.496860927	NaN	-0.043998309	-0.082339823	0.566177356	0.047669636	-0.114199907	-0.044606338	-0.534895925	-0.181391285	-0.260413675	-0.254496983	0.180774232	0.06081776	0.144399165	0.029497187	-0.36487048	0.6417467	0.322400072	0.642973006
8.2	0.591418506	0.41071812	0.468553387	0.403151102	-0.172007666	-0.152316974	0.093537965	-0.054329431	0.238475722	0.459042749	0.170875294	0.368605379	0.591998776	-0.034310677	0.552406451	-0.068817232	0.439151467	0.014081839	0.45880993	NaN	0.001681445	-0.041979914	0.443460133	0.121136126	0.00092903	-0.067716265	-0.521141093	-0.41021869	-0.178680978	-0.34402405	0.209594132	0.163882104	0.186420441	0.098452281	-0.490581971	0.298242551	0.007506024	0.332817929
8.4	0.646821183	0.546799435	0.53323589	0.373760409	-0.044792692	-0.146698059	-0.013407313	-0.107102833	0.193374318	0.486872706	0.148957651	0.2252716	0.432351477	-0.207297409	0.371232299	-0.10715769	0.356876045	-0.008016406	0.398751392	NaN	0.010535736	-0.070301999	0.674312422	-0.022033217	-0.061248696	0.110869549	-0.654883028	-0.19472504	-0.218680478	-0.351858664	0.174217625	0.128169803	0.124042728	0.111539901	-0.588910141	0.177729435	-0.350491547	0.456089576
8.6	0.517328464	0.394681782	0.429288733	0.462740243	-0.069090622	-0.106065721	0.11759488	-0.054572973	0.052747316	0.443892287	0.069254556	0.235534882	0.454540422	-0.086300999	0.19158449	0.01134234	0.315361555	-0.057539576	0.364181021	NaN	-0.015314813	-0.05504519	0.679220377	0.023031276	-0.003481359	0.152392672	-0.595113073	0.02278442	-0.15044743	-0.225825652	0.214477618	-0.012141054	0.09799206	0.032975518	-0.552174312	-0.428599407	-0.146588705	0.026433647
8.8	0.384312477	0.269539498	0.408236965	0.477840219	0.022503632	-0.071955409	0.139335631	-0.034644146	0.123844858	0.476381336	0.139682574	0.250316074	0.338117853	0.161790017	0.228800784	0.331948361	0.239726415	-0.07597308	0.228931825	NaN	0.023571255	-0.093889303	0.540865808	0.010943455	0.127646033	0.113094824	-0.60285253	0.131335842	-0.187308173	-0.084863642	0.33706387	-0.01107124	0.124057836	0.005500719	-0.546360934	-0.519640754	-0.330498774	-0.028612124
9	0.36256393	0.155277879	0.341158962	0.416083134	0.261724914	-0.08749699	0.462789194	-0.179357655	0.055781913	0.362403851	0.129544137	0.10186324	0.315893072	0.349455754	0.281919036	0.525812068	0.239020345	-0.088866183	0.260654052	NaN	0.079016742	-0.043142726	0.470553204	-0.048527499	0.077892608	0.053446782	-0.456861757	0.073736612	-0.239369946	-0.101382	0.201779707	0.006015107	0.053872095	0.011809137	-0.523462471	-0.410368845	-0.167814413	0.033598982
9.2	0.172071965	0.181262353	0.336125318	0.408001496	0.290924719	-0.206697178	0.386131459	-0.017734522	-0.058015305	0.191366321	0.087431735	0.031223556	0.044224185	0.137579522	-0.023194065	0.346154243	0.201472938	-0.066388752	0.251296534	NaN	0.053178743	-0.003317935	0.372412799	0.000976345	-0.135124359	-0.072970935	-0.151568037	0.174098022	-0.134623027	-0.026979	0.110169865	-0.029846711	0.028697861	0.006893484	-0.540517411	-0.205870411	-0.174522386	-0.08689199
9.4	0.083349315	0.184536947	0.388618299	0.343770891	0.090868095	0.086269399	0.623244644	-0.000477994	-0.064384869	0.090255067	0.059846148	0.063349235	0.315567172	0.290923975	0.15076875	0.199963594	0.189475881	-0.071112564	0.260690349	NaN	0.029372332	0.003950905	0.338905897	-0.026708982	0.080191017	-0.156329663	-0.036323913	0.275503929	-0.065645156	-0.03670844	-0.026035774	0.0388186	0.046553897	0.048530507	-0.489769689	-0.353047705	-0.22004256	-0.151370102
9.6	0.122484916	-0.045105522	0.3589396	0.382541239	0.39932914	0.096564842	0.727963124	-0.126215684	0.043228736	0.025683307	0.085967591	0.120811472	0.357511186	0.021147799	0.244607875	0.212013656	0.201041058	-0.048928659	0.232507488	-0.055045978	0.029316183	0.024441148	0.374760738	-0.024285415	0.113605548	-0.047683936	-0.065972809	0.262034928	-0.073067957	0.023825204	0.016032162	0.038291709	0.066728282	0.033205419	-0.538682886	-0.338129207	-0.195792511	-0.156486134
9.8	0.292760174	0.044621904	0.304362406	0.334444731	0.507484313	0.045362047	0.714490577	0.024783318	-0.071204733	-0.09791719	0.053332333	0.082641012	0.117617292	-0.041335763	0.093460186	0.1454029	0.243064651	-0.045511566	0.24240877	-0.025297036	0.054155428	-0.011337872	0.499574045	0.008338289	-0.032596497	0.14235491	0.0873428	0.317270039	0.008973411	0.090490638	0.01691926	-0.023397177	0.075203317	-0.015496577	-0.527322226	-0.262078931	-0.257637411	-0.061433174
10	0.209736887	-0.221675259	0.32233091	0.370582824	0.403945121	-0.01624004	0.537057414	-0.014354898	0.03177122	-0.040324891	0.129047244	0.046109638	0.363937137	0.367540407	0.301244256	0.476010028	0.228413	-0.087304389	0.166590911	0.026542971	0.050373324	-0.033905361	0.507025018	-0.0100664	-0.196870949	0.237305786	0.151036478	0.442357342	0.089729415	0.023772661	0.071689882	-0.023476539	0.073470176	0.004467699	-0.296125745	-0.424744829	-0.08579535	-0.181734184
10.2	0.137293701	-0.119140446	0.281696238	0.324733981	0.434136035	0.060126242	0.370488321	-0.08266419	0.096904659	-0.00372648	0.073607662	0.029448479	0.475881451	0.707933829	0.472347871	0.680882338	0.215634288	-0.127004909	0.140034062	0.035088733	0.052257149	-0.046047677	0.446475304	-0.008947695	-0.097539147	0.094386697	-0.090415694	0.233239877	0.007834526	-0.135425059	0.102247941	0.016937242	0.051757193	0.03656055	-0.416893019	-0.632473507	-0.05915014	-0.187599564
10.4	0.196812281	0.011589714	0.211888451	0.294794668	0.401941047	0.009328863	0.459792941	-0.039444362	-0.0301521	-0.044709531	-0.061850824	0.034735975	0.480056678	0.658737961	0.327137682	0.492965117	0.25914131	-0.136231588	0.255698631	0.03425183	0.037593078	-0.041797678	0.388606558	0.020875941	0.045924465	0.03954426	-0.033506506	0.10888299	0.022612091	-0.187906971	0.072394711	0.036662041	0.062390474	-0.011566544	-0.614414997	-0.322032847	-0.12766765	0.041262713
10.6	0.371556289	0.012579411	0.276524895	0.306726941	0.455951503	0.074711085	0.560301141	0.117256279	-0.091581478	-0.028107998	-0.006444375	0.026801932	0.425882498	0.393075871	0.146272065	0.357042207	0.292672214	-0.151798585	0.285648666	0.004444664	0.066571275	-0.072987379	0.42446909	-0.042212367	-0.010099909	0.136062902	0.091449473	0.337970447	0.078361522	-0.040542505	0.119776824	0.012883945	0.064055413	-0.008011664	-0.38923741	0.002316539	-0.038401877	0.159800292
10.8	0.184504326	-0.009467492	0.227628915	0.245356947	0.476836704	0.028338374	0.617951515	0.061262772	-0.058780818	-0.051786906	0.077675322	-0.027626729	0.201597801	0.404761566	0.003522042	0.453862287	0.288333432	-0.215998863	0.270248549	-0.043896469	0.07477829	-0.101666946	0.382004036	-0.039957392	-0.069215404	0.203110847	0.039485503	0.464950793	0.024506752	0.010670127	0.134979756	-0.014233851	0.07270509	0.004901676	-0.315317098	-0.269482441	0.008653604	0.02719638
11	0.054952058	0.060036937	0.204806603	0.282678303	0.447823983	0.082242778	0.452965407	-0.008906236	0.037925075	-0.030631634	0.068728209	-0.045700441	0.334560655	0.2625525	0.085985991	0.46500598	0.238244526	-0.38869786	0.290456792	-0.111269088	0.032975439	-0.059936503	0.28536266	0.036334626	-0.134536541	0.104234062	-0.014560527	0.410287245	-0.06818696	-0.043888574	0.103489026	-0.067396749	0.098997737	-0.049729212	-0.366733374	-0.442514743	-0.048600446	-0.124495591
11.2	0.002917272	-0.059329938	0.233379193	0.266489879	0.304264722	0.015530081	0.255046954	0.002740476	0.150539852	0.079085545	0.083051478	-0.042281248	0.565754996	-0.146487005	0.248106204	0.333647451	0.171953469	-0.617278902	0.188113216	-0.199425386	0.030954559	-0.049272107	0.294494041	0.030015395	-0.163088593	-0.030588846	-0.118536242	0.427607193	-0.103424502	-0.021898109	0.145199631	-0.098967896	0.076901557	-0.031645035	-0.240035445	-0.397675493	-0.082772658	-0.117644009
11.4	0.12599407	0.026005362	0.16208951	0.149948487	0.485264989	0.030526913	0.229440095	-0.095923009	0.25546732	0.167236425	0.096889204	-0.02756536	0.603420274	-0.157766712	0.271865227	0.345581493	0.194187684	-0.743912287	0.115765849	-0.228242449	0.059603055	-0.062364967	0.236790466	0.025685115	-0.09750572	0.019342933	-0.158303558	0.519563396	-0.047844011	-0.028450872	0.164979261	-0.02594745	0.077458775	0.0145388	-0.233287688	-0.395461331	0.00508797	0.050334637
11.6	0.171164442	0.149231899	0.17514761	0.193868252	0.325156105	0.15333098	0.389199607	0.038201655	0.218303095	0.251039363	0.032827687	0.037564403	0.702871065	0.040908441	0.373839141	0.336153804	0.265911382	-0.804855568	0.232040647	-0.252596218	0.110110096	-0.055075021	0.221578333	0.008567353	-0.036013616	0.049898452	-0.22210126	0.464766969	-0.044629522	-0.067321587	0.098023344	0.055150192	0.054165529	0.057739812	-0.193254233	-0.306659493	-0.079667215	0.099003732
11.8	0.055305472	0.114126392	0.272245009	0.060076015	0.397240746	0.050277318	0.23013103	-0.050414146	0.006673127	0.303366758	-0.023261438	0.103538274	0.664988746	0.298619474	0.311635214	0.3378709	0.257624829	-0.860133518	0.274667302	-0.283553039	0.057490182	-0.076989119	0.240176011	0.010447377	0.031364339	0.046565169	-0.240037715	0.295721694	-0.049732626	-0.129079295	0.069387861	0.089079322	-0.022593332	0.124298589	-0.203521536	-0.275248923	-0.284581862	-0.120846013
12	0.279925543	-0.061968238	0.138019449	0.082099432	0.238802571	-0.016826508	0.272640783	0.008843989	-0.084650438	0.401711924	-0.067821724	0.187347085	0.703982042	0.251311166	0.221315774	0.326652491	0.245253402	-0.845951495	0.204379659	-0.248471686	0.04421502	-0.107040057	0.315141677	-0.017788999	-0.078653878	-0.028325731	-0.291947195	0.187982354	-0.10583717	-0.123195833	0.076670175	0.069076944	0.032543719	0.100177507	-0.340862314	0.064491519	-0.128397406	0.102699651
12.2	0.094289023	-0.074061202	0.184801925	0.029185836	0.276648564	-0.028515357	0.470270224	0.004057819	-0.113696256	0.409977445	-0.085830183	0.159643065	0.552844335	0.134735984	0.070828934	0.339217265	0.24993781	-0.766707172	0.170900333	-0.163925676	0.072316202	-0.123138822	0.390669736	-0.072630611	-0.077141791	0.064705332	-0.362992177	0.009870802	-0.101237422	-0.177789794	0.043544297	0.171616246	0.062730876	0.112727569	-0.438588745	-0.177257164	-0.189170938	0.049573167
12.4	0.189837816	-0.129718072	0.090692416	0.004651059	0.237038536	-0.025658126	0.519974078	0.011253962	-0.187470949	0.448833501	-0.077129166	0.161171705	0.167521467	-0.039111019	-0.054576489	0.348678844	0.251085058	-0.685693609	0.290416601	-0.225391423	0.070199774	-0.132114331	0.35765148	-0.052474323	-0.065674216	0.034376609	-0.200381677	-0.0355404	-0.090455213	-0.183810218	0.04950769	0.185332486	0.002005121	0.129336847	-0.302649133	0.223365476	-0.094635207	0.19995468
12.6	0.175117783	-0.092178591	0.137813907	0.002619154	0.129951639	-0.064877221	0.442924366	0.032986129	-0.186357483	0.537929946	-0.042367033	0.136045431	0.013349826	-0.069699374	-0.042099343	0.480805601	0.222120148	-0.685747485	0.240226623	-0.274071593	0.12042647	-0.134238698	0.36991119	0.0163282	-0.226153366	-0.058478018	-0.036898787	0.023241804	-0.109674148	-0.149818613	0.027877038	0.075187893	0.094849449	0.113481485	-0.355588751	0.472557165	-0.089822404	0.476134175
12.8	0.261090469	-0.209847255	0.161531295	0.045458585	0.159595822	-0.082047874	0.49191179	-0.058408947	-0.235351603	0.446253273	-0.059931599	0.055974809	0.144456361	-0.199231903	-0.060121111	0.499101849	0.162660995	-0.668969805	0.099613672	-0.236168043	0.099854011	-0.100136283	0.388111665	-0.006984325	-0.078042671	-0.083487169	0.007444409	0.232651779	-0.153271246	-0.143417538	0.170391959	0.029485976	0.084193767	0.081465315	-0.442604371	0.269926497	-0.152894284	0.751503101
