# Supplementary material for: Circuits for integrating learned and innate valences in the insect brain
Source: eLife journal article supplement (doi:10.7554/elife.62567), 2021-11-10
Supplement: supp [file elife-62567-supp-v1.zip › elife_poa_e62567_Figure_4_source_data_2.csv]

Individual GCaMP fluorescence values in response to odour presentation by MBON-m1 of animals with silenced mushroom body
Fluorescence values of the selected ROI over time for each repeats and each individuals as plotted in Figure 4c (right panel).
	indiv1_				indiv2_				indiv3_				indiv4_				indiv5_				indiv6_
time (s)	repeat_1	repeat_2	repeat_3	repeat_4	repeat_1	repeat_2	repeat_3	repeat_4	repeat_1	repeat_2	repeat_3	repeat_4	repeat_1	repeat_2	repeat_3	repeat_4	repeat_1	repeat_2	repeat_3	repeat_4	repeat_1	repeat_2	repeat_3	repeat_4
0	NaN	NaN	NaN	NaN	NaN	NaN	NaN	NaN	NaN	NaN	NaN	NaN	NaN	NaN	NaN	NaN	NaN	NaN	NaN	NaN	NaN	NaN	NaN	NaN
0.2	0.093928919	-0.098577053	-0.070352732	-0.093982379	0.220784617	0.269404001	-0.178804135	0.095351625	0.041583027	0.35712263	-0.268357906	-0.04393309	-0.38974735	-0.205947744	0.044960912	0.286804642	-0.008340503	0.053963061	-0.122389003	0.09041517	0.180057958	0.308753421	0.022196787	-0.432696058
0.4	0.108617472	-0.057678845	-0.039343643	-0.031954436	0.214975843	0.181223424	-0.151883562	0.142407396	0.080555235	0.442248858	-0.076064594	-0.044834007	-0.427885273	-0.203816318	-0.067394563	0.261135141	-0.007424414	0.036019227	-0.04602844	-0.029287169	0.450957216	0.206147815	0.180578755	-0.450044329
0.6	0.1112605	-0.040294495	-0.005164758	-0.020210989	0.220169583	0.113312949	-0.185130476	0.045180698	0.117091286	0.396463095	-0.056405272	0.014492125	-0.459607211	-0.016764831	-0.098792201	0.104398169	0.06186844	0.012373136	0.037866449	-0.053199166	0.315194268	0.069648273	-0.138418883	-0.616731084
0.8	0.133540629	-0.01853508	0.145958047	-0.008416228	0.171907034	0.145333563	-0.243178717	-0.037492197	0.074577747	0.224324595	0.028588958	-0.014038158	-0.393877337	0.039844629	-0.231225768	0.082262602	0.129112059	0.038472824	0.116819908	0.002250647	0.101965958	0.375703717	-0.228819454	-0.715390698
1	0.148007518	0.038132163	0.176563243	0.054427357	0.102109194	0.038966388	-0.254872573	-0.157372154	-0.052033339	0.132180532	0.0250413	0.070868124	-0.354346098	0.179182013	-0.291314487	0.121162375	0.118439897	0.050643764	0.082238466	0.084370942	-0.285327429	0.099248792	0.066036084	-0.672907236
1.2	0.073852554	0.052938491	0.120352469	0.0925379	0.175857637	0.041068111	-0.17665017	-0.015533437	-0.032199962	0.090930807	-0.13115577	0.030951942	-0.281468902	0.254755117	-0.382963773	0.163353571	0.13784464	0.054260063	0.072694833	0.051631428	-0.366634004	0.081330694	0.235279349	-0.513878466
1.4	0.097059061	-0.002774265	0.051038093	0.114134041	0.062602473	-0.000924909	-0.100599098	0.002860541	-0.018550842	0.090900195	-0.176846282	-0.046285414	-0.064206533	0.121410999	-0.458775939	0.163811523	0.108001844	0.036581395	0.042537885	0.111075139	0.239100714	0.046071808	0.198840598	-0.496710343
1.6	0.046968209	-0.043917717	-0.035392755	0.054374181	-0.061783221	-0.089027099	0.045528705	-0.035956821	-0.027359447	-0.002913141	0.224820156	-0.013496816	-0.01812604	0.114490241	-0.363378393	0.268904104	0.157219393	-0.013616188	0.066451621	0.127281419	0.115843767	0.128301151	-0.029021315	-0.452240472
1.8	-0.103056759	-0.056010952	-0.116697849	0.033622309	-0.124481166	-0.061868528	0.094265291	-0.033276886	-0.032835393	-0.087167811	0.360168443	-0.048903401	0.086594641	0.175805324	-0.439465066	0.188900836	0.14747985	-0.023663359	0.046297222	0.114989138	0.022281303	0.172366908	-0.048577025	-0.174569993
2	-0.105892477	-0.048818418	-0.152728788	0.039906369	-0.11353565	0.064729432	0.084437165	-0.048643675	-0.050589541	-0.064326069	0.250146615	-0.124946189	0.072719181	0.050895999	NaN	0.049442515	0.039110952	-0.012978948	0.032001461	0.056759202	0.11065152	-0.000939824	-0.03518679	-0.029554698
2.2	-0.055915827	-0.02106097	-0.120594177	0.020014382	-0.14289453	0.121230722	0.063775393	-0.05804877	-0.175995044	-0.012274016	0.042054257	-0.041945772	-0.048678646	-0.167649642	NaN	-0.111704282	-0.02493673	-0.00500755	-0.020780225	0.049153852	-0.122527626	-0.026511719	-0.16781298	0.036313654
2.4	-0.046353443	-0.014911487	-0.096089134	-0.016333455	-0.190400152	0.041505225	0.035365777	-0.075887254	-0.007272335	0.020540439	-0.025161216	-0.01089037	-0.075492959	-0.102902853	-0.029577249	-0.08220452	-0.055743305	0.005279424	0.017747618	0.038761695	-0.111517036	0.143885233	-0.347486667	0.133539411
2.6	-0.130850889	-0.031510046	-0.142946543	-0.056635656	-0.170460982	0.021461391	0.060378224	-0.13858497	-0.045593342	0.060140657	-0.032867479	-0.036854184	-0.080176229	0.406159659	-0.064240822	-0.046305364	-0.041296365	0.051120581	0.057451298	0.007117151	-0.143368948	0.244426435	-0.325530655	0.183747149
2.8	-0.190293447	-0.024319061	-0.201532232	-0.041766823	-0.172639326	-0.01444098	0.087935829	-0.118041979	0.001396365	0.070101797	-0.048468306	-0.072283383	0.040784982	0.369513188	0.019135816	-0.165999292	-0.035968629	0.093859473	0.041272508	-0.043020149	-0.295278483	0.122012756	-0.106706131	0.064661606
3	-0.187035941	0.033303872	-0.253184906	0.024275122	-0.16376957	-0.052038899	0.112755899	-0.044720827	0.039017547	0.018285423	0.041442481	-0.083868023	0.262240641	0.127873086	0.239276118	-0.222214862	-0.049470953	0.068506197	0.058562537	-0.049358101	-0.053287907	-0.129284271	-0.029519833	-0.056048211
3.2	-0.206548652	0.069762526	-0.244760328	0.059954725	-0.139986567	-0.143902616	0.150792495	-0.026547687	-0.015303416	-0.049329085	0.091643817	-0.119692615	0.394925099	0.088425472	0.150102626	-0.165748347	-0.067594349	0.044862996	0.048357125	-0.067865984	0.26249376	-0.378043429	0.117085516	-0.236200732
3.4	-0.134945512	0.076075871	-0.160529893	0.027885035	-0.090995094	-0.140700848	0.163357266	0.032261645	-0.026159815	0.003613807	0.025691628	-0.021916396	0.288280496	-0.052474227	NaN	-0.121014534	-0.109497721	0.025610515	-0.031314566	-0.063215305	0.162570108	-0.372466766	0.278858813	-0.089410233
3.6	-0.011608029	0.083776142	-0.084874857	0.026059447	0.024348789	-0.070894363	0.139573318	0.048411161	0.035700329	-0.075454251	-0.044480739	0.038603351	0.212903362	-0.258227697	NaN	-0.092718391	-0.171740357	-0.005880562	-0.138097834	-0.056205466	-0.073828354	-0.116963682	0.327745603	0.303802177
3.8	0.002427777	0.086350181	-0.051491805	0.004128034	0.045972952	-0.086014144	0.112173459	0.026702504	0.014767231	-0.151876508	-0.115803805	0.016202976	0.285860721	-0.330594744	0.225694048	-0.079524163	-0.180087546	-0.045741341	-0.196186575	-0.086490131	-0.132076353	0.006781092	0.196447289	0.491561335
4	0.007064089	0.074348186	0.040914607	-0.065279223	-0.014619952	-0.108238139	0.084926695	0.01841321	-0.036454079	-0.213627123	-0.099968681	0.030459265	0.342425804	-0.162770547	0.447547599	-0.079106839	-0.142807992	-0.063264684	-0.155917232	-0.079349296	-0.082683042	-0.108182331	-0.059078103	0.626486985
4.2	0.043358964	0.035683507	0.186062983	-0.093926855	0.009894995	-0.096641422	0.082882735	-0.013191208	-0.06919562	-0.248673593	-0.043770571	0.076823392	0.318427232	0.063932494	0.458500334	-0.024268389	-0.082955432	-0.036259482	-0.09356103	-0.01811975	-0.062043913	-0.172342905	-0.193172475	0.619502387
4.4	0.032855706	-0.009084635	0.305489304	-0.047095392	0.044922351	-0.057883177	0.074604228	0.055244644	-0.045824521	-0.230632561	-0.055653192	0.170583368	0.182532041	0.036103256	0.427829779	0.026320517	-0.009956304	-0.054669896	-0.063503657	-0.002381986	-0.122526313	-0.090414885	0.00832433	0.489011611
4.6	0.05928421	-0.024692761	0.352603511	-0.002451319	0.051693768	-0.026344796	-0.00949041	0.162641549	0.042367938	-0.136304797	0.004512283	0.183270177	0.053812448	-0.14872149	0.297836829	-0.06672306	0.006413654	-0.116645172	-0.009926929	-0.052583925	-0.049886872	-0.118662964	0.198017918	0.573596701
4.8	0.125024728	-0.032046258	0.267011224	-0.047614555	0.048598295	-0.048640945	-0.069076675	0.131710102	0.062309255	-0.211296395	0.054227824	0.0915928	0.024623752	-0.244987128	0.173163617	-0.234046882	0.029299217	-0.122555049	0.072680949	-0.075099793	0.044056463	-0.277363871	-0.037789271	0.753007957
5	0.081707815	-0.067134405	0.190965266	-0.057002794	0.009408498	-0.060165831	-0.072453152	0.067372343	0.079372745	-0.239073679	-0.00847038	0.061538083	-0.252903869	-0.304825473	NaN	-0.238626174	0.128498933	-0.128493569	0.122667531	-0.110133728	-0.066279065	-0.25520066	-0.089722263	0.840486473
5.2	-0.030194347	-0.114279038	0.191279699	-0.100584996	0.069322695	0.028848547	0.042539716	0.121317132	0.085043101	-0.327086242	-0.038083234	0.136824572	NaN	-0.228428951	NaN	0.099176331	0.261242477	-0.146993711	0.162377875	-0.116903827	0.111412462	-0.05453124	-0.10292001	0.631063618
5.4	-0.006082033	-0.09959991	0.304052561	-0.154644338	0.263316543	0.332248439	0.405873758	0.336751638	0.145887614	-0.322596897	0.11543855	0.098847942	NaN	0.445205342	0.047046853	0.706462407	0.448973411	-0.116743795	0.276337652	0.011278471	0.239839808	0.151434362	-0.245459131	0.814216
5.6	0.117902574	-0.032289039	0.666457017	-0.118496106	0.567512508	0.591228114	0.577836638	0.661383826	0.22810406	-0.257869757	0.511835476	0.321310431	NaN	0.799439533	0.199084139	1.170791166	0.703182656	-0.108959697	0.368255248	0.152866137	0.748213909	0.238010814	-0.088623608	1.077099111
5.8	0.287432949	0.036240115	0.982519212	-0.006359645	0.867374725	0.762695253	0.717799002	0.889802322	0.19795934	-0.409345608	1.046430709	0.536931364	0.727233243	1.086158808	0.083961532	1.345511759	0.823465784	-0.007389677	0.393026498	0.303466037	1.404724708	0.265596937	0.403582336	0.9927048
6	0.390825247	0.024645041	1.083618107	0.058182565	0.928287963	0.845009966	0.944901905	0.959235111	0.343576715	-0.489170116	1.252751538	0.781082323	0.553666475	1.45111931	0.057924645	1.716290364	0.879499881	0.072048747	0.412392103	0.331757756	1.574364725	0.343130672	0.467728639	0.937027675
6.2	0.533536956	0.062420746	1.275514768	0.062113949	0.928667704	0.834718825	1.060135854	0.881576078	0.337984191	-0.469875018	1.213263141	0.724464763	0.450039833	1.75269603	0.079673539	1.758251494	0.967514114	0.170387467	0.479558148	0.386346919	2.671315543	0.238103782	0.380265112	0.620447956
6.4	0.59896444	0.079338718	1.294224649	0.095692276	0.961805684	0.896229952	1.219875078	0.97211696	0.255672897	-0.437887169	1.031048393	0.727292577	0.403852368	1.962235808	0.150214963	1.813863354	1.099601092	0.238957706	0.580065648	0.417153265	3.265765857	0.451452294	0.83906316	0.697160645
6.6	0.668639379	0.15580489	1.186650739	0.098485784	0.974119321	0.867241767	1.188474228	1.046176465	0.19915661	-0.40158041	1.126571906	0.742281725	0.191319446	2.121393743	0.098052023	1.866406613	1.245573667	0.209064447	0.598533515	0.520239803	3.330819773	0.615056742	1.22106674	0.624379738
6.8	0.735074626	0.231947723	1.21300066	0.069678542	1.033007308	0.932172973	1.26448835	1.068870711	0.260407607	-0.392552859	1.152886784	0.73762058	0.201425314	2.120021152	0.047333707	2.02666432	1.111199974	0.24709342	0.668882965	0.669985871	2.820155722	0.259068582	0.842780419	0.660207156
7	0.698215468	0.2141268	1.289977608	0.013013054	0.969085062	1.029182348	1.273919798	1.034463837	0.451150334	-0.450950898	1.620232642	0.68148728	0.137656309	2.520742839	0.151075006	2.247070212	1.011533445	0.346713444	0.584737712	0.814593157	3.122822169	0.395080105	0.992693736	1.047671206
7.2	0.749952781	0.183882143	1.336701943	0.033181004	0.892795694	1.15953128	1.322317316	0.964924645	0.382592818	-0.376653342	1.650534161	0.800370784	0.077814391	2.397702307	0.50621728	2.159742913	0.768568967	0.296583579	0.587489632	0.926323513	3.456832761	0.284651035	1.732053498	0.804040934
7.4	0.750806646	0.123365719	1.409968455	0.051208777	0.855175751	1.179921843	1.254650274	0.864863973	0.441870401	-0.398618364	1.424175882	0.950236662	-0.027943207	2.231922506	1.036748836	2.131588335	0.671183985	0.309512735	0.498072338	0.895492551	2.75242332	0.301108232	1.814041382	1.025174548
7.6	0.879481454	0.045894352	1.431313242	0.108375261	0.795454251	1.136815306	1.192045715	0.786452239	0.369181659	-0.345817727	1.392651617	0.860830969	-0.123542662	2.378890607	1.147694583	1.986648287	0.608956729	0.280133497	0.419615369	0.774197333	3.428763596	0.489330346	1.109797897	0.883140027
7.8	0.779768405	0.070729397	1.397867593	0.181455737	0.870782338	1.169770124	1.243559576	0.827284257	0.324544793	-0.267210018	0.631290765	0.958059883	-0.147376954	2.385273937	1.237427482	1.824032129	0.531713523	0.250254256	0.406042737	0.705820283	2.637876863	0.277396533	1.159301477	0.682606811
8	0.72610902	0.086060142	1.307945839	0.21051047	0.849973381	1.133571169	1.12391146	0.751794479	0.485252743	-0.237357007	1.334768291	0.781089122	-0.300857871	2.265757681	1.410138195	2.184736432	0.404327866	0.276659505	0.43355821	0.768038795	2.430750456	0.246929588	1.77911455	0.836589971
8.2	0.758014172	0.123131557	1.374448942	0.182537792	0.688360365	1.139328965	1.115260436	0.736527929	0.890228317	-0.296642313	1.276365335	0.807854767	-0.598544844	2.271062932	1.433346662	2.220809386	0.372538882	0.333142284	0.395628985	0.839149591	2.767564376	0.179837027	1.699160402	0.914347671
8.4	0.757483634	0.124669953	1.298844763	0.114201048	0.58541218	1.215552325	1.136948269	0.547368557	1.159152769	-0.390346785	1.152469274	1.075071651	-0.71023507	2.26904743	0.287903843	2.134470803	0.295350324	0.385644991	0.323808253	0.931684199	2.092029665	0.014044017	1.618009608	0.767597831
8.6	0.777486563	0.178495215	1.202652645	0.068706904	0.617928586	1.226845161	1.140818031	0.52541893	1.435046082	-0.335477448	1.095627439	0.950902917	-0.433747431	2.11397477	1.36312539	1.941222901	0.236165832	0.37020889	0.224408422	0.841578053	2.775377425	0.319418532	0.723140246	0.929444691
8.8	0.823638647	0.123178036	1.061496284	0.014638974	0.58650745	1.115039708	1.024024612	0.585516723	1.789669897	-0.251012302	0.028379398	0.906743199	-0.480028845	2.944129539	1.852053784	1.76840627	0.1924515	0.336619069	0.202189296	0.75274548	2.943135486	0.213729872	0.389170681	0.874703434
9	0.792705788	0.125175729	1.004885345	0.039005458	0.591791676	0.969386874	0.913725012	0.55911612	2.117980948	-0.271671754	0.609197703	1.301254898	-0.191161077	2.871781198	1.849315784	1.798773774	0.22845576	0.294849487	0.248996275	0.772723262	2.995243185	0.320619212	0.138213472	0.356792015
9.2	0.841749179	0.103732609	1.009865381	0.144474978	0.56352168	0.885053129	0.961869739	0.471019093	2.391958887	-0.33744621	0.715893006	1.103451989	-0.081946827	2.773288238	1.738702121	1.767956775	0.188614393	0.143829969	0.195548651	0.759555453	2.740467123	0.597184286	0.333200747	0.17459969
9.4	0.856591521	0.118670253	1.003028292	0.154078385	0.514643449	0.866277776	0.858797716	0.527856323	2.648515154	-0.282670043	0.551433063	1.26933751	0.180151533	2.960870649	1.456466561	1.817332512	0.228175587	0.076836709	0.125865692	0.758539361	2.404502784	0.5966905	0.348768987	0.022618098
9.6	0.700585164	0.103193804	1.020638764	0.099787318	0.426420878	0.850725844	0.905567239	0.570174652	2.76888798	-0.289844273	0.227800236	1.305991194	NaN	2.732635711	1.713441541	1.845554921	0.420114214	0.055153994	0.121610101	0.86804884	2.267737626	0.607069441	0.629597047	-0.2044115
9.8	0.6511457	0.102470437	1.060284576	0.097728784	0.384136336	0.802738282	0.81641652	0.48255306	3.175513736	-0.287588923	0.411390209	1.087827954	NaN	2.349829033	2.056461968	2.061802053	0.655954445	0.000717558	0.172681994	0.80265283	1.859396488	0.55458333	0.42843676	-0.117252245
10	0.649235224	0.108933753	1.182835197	0.046458293	0.386116911	0.654323704	0.714684333	0.493930449	3.262829196	-0.262901846	0.514936668	0.883654405	0.388143042	2.013387877	2.68561137	1.87555139	0.821832689	-0.091269413	0.198066817	0.624350545	1.41542427	0.454002045	0.145984671	-0.155681603
10.2	0.651167053	0.067494321	1.22427841	-0.012311401	0.409357685	0.557229662	0.620310973	0.462742196	3.222851665	-0.209813966	0.671221865	0.832728068	NaN	2.183699068	2.593358657	1.897870408	0.837007087	-0.178211557	0.198534197	0.456781957	1.559290319	0.299250404	-0.06644418	-0.371199624
10.4	0.670065551	-0.0342688	1.16680359	-0.01567094	0.351324704	0.417343325	0.39887763	0.376886462	NaN	-0.168172413	0.873904727	0.741212524	NaN	2.180763554	1.836350922	2.058984386	0.827073654	-0.217868728	0.20432856	0.338390005	1.719475378	0.212693446	-0.252518627	-0.401215772
10.6	0.681003843	-0.055369381	1.180530986	0.012573293	0.187367349	0.237533109	0.212508182	0.231916876	NaN	-0.180704631	0.76010313	0.591167861	NaN	1.997173923	1.288943896	2.128169521	0.859419681	-0.276153034	0.220282665	0.247825472	1.334379648	0.145270534	-0.335642062	-0.391205867
10.8	0.718042685	-0.074811701	1.235113568	-0.018232694	0.01973859	0.107642104	0.110776099	0.085107386	NaN	-0.160553808	0.484212885	0.48307746	0.578892779	1.954292771	1.390801768	2.024730901	0.932337977	-0.315202036	0.268934052	0.162602194	1.641955556	-0.543744198	-0.443198386	0.005701588
11	0.711710757	-0.130050253	1.130841874	-0.090555722	-0.051995385	0.002312944	-0.012757472	-0.016855539	NaN	-0.150355116	0.386563244	0.439724573	0.373389657	1.990522264	1.419060839	2.017707999	0.900319317	-0.331509351	0.302882664	0.124281124	2.2499786	NaN	-0.544257247	0.372456463
11.2	0.668619473	-0.151064369	0.99969993	-0.11072575	-0.075516968	-0.068771903	-0.098560356	-0.058473884	NaN	-0.176067772	0.238964681	0.406771207	0.114703936	2.14140341	1.249859663	1.969850197	0.792420363	-0.340967216	0.277604176	0.052808009	2.490458666	NaN	-0.544086448	0.406386536
11.4	0.597214008	-0.182013126	0.925866563	-0.121604922	-0.103215698	-0.092755134	-0.177981426	-0.031335946	NaN	-0.189881321	0.119352608	0.427955638	-0.05567234	2.277982625	1.27377554	1.864934799	0.692589745	-0.344156618	0.254262697	-0.004352092	2.796207468	NaN	-0.51013313	0.294785586
11.6	0.622947819	-0.208151729	0.903613221	-0.173017538	-0.109001975	-0.098717678	-0.232614202	-0.031064923	NaN	-0.24644187	0.121250289	0.384955903	-0.155108011	2.315981198	1.437691678	1.744970551	0.654604981	-0.340298087	0.229903078	-0.043966213	2.957028228	NaN	0.07474417	0.161524441
11.8	0.656118615	-0.202927118	0.901086946	-0.207414006	-0.128881111	-0.110914049	-0.200109794	-0.035317611	NaN	-0.401296572	0.015049286	0.302405251	-0.134282967	2.10991974	1.623527083	1.702230893	0.614365654	-0.345595553	0.174881172	-0.033277556	2.815475559	NaN	0.871728606	0.047207941
12	0.592573082	-0.230757934	0.811581613	-0.195805377	-0.185155354	-0.138948387	-0.166504537	-0.102737051	NaN	-0.440799226	-0.007345171	0.322638654	0.032232134	1.876270088	1.584037769	1.695912581	0.619049535	-0.3668462	0.129621688	-0.019098137	2.538498107	NaN	1.366267593	0.21230634
12.2	0.54759085	-0.264295805	0.618480444	-0.16506191	-0.223842517	-0.174139272	-0.19091155	-0.250563224	NaN	-0.578140388	0.139948751	0.293089719	0.273807842	1.779412777	1.467483706	1.596688334	0.673703098	-0.383516724	0.126884533	-0.114587026	2.226349627	NaN	1.722000054	0.389349318
12.4	0.440863448	-0.240413465	0.44110196	-0.139717658	-0.236310809	-0.199807503	-0.187466778	-0.272469626	2.103805241	-0.396156765	0.186092051	0.219468048	0.527922543	1.530525309	1.505559769	1.451294503	0.638206463	-0.393345852	0.113709193	-0.208334687	2.081108754	NaN	1.644795525	0.302121796
12.6	0.329978342	-0.223777821	0.404900378	-0.154514834	-0.265401413	-0.200917072	-0.136952204	-0.223114436	2.444349093	-0.252514944	0.163264903	0.245521896	0.681369383	1.3331091	1.33760249	1.224126373	0.606051844	-0.403425788	0.067315747	-0.236555112	2.06773224	NaN	1.116715549	0.284159811
12.8	0.360336344	-0.239328228	0.500294394	-0.204206667	-0.265759189	-0.182420979	-0.165924667	-0.222025808	2.625118107	-0.255144882	0.127720434	0.235813249	0.769282274	1.170677177	1.177372256	1.167164726	0.587105906	-0.427145966	0.031762552	-0.215563583	2.244502151	NaN	0.692714269	0.049160243
13	0.393067136	-0.22288508	0.649796449	-0.216797581	-0.138061648	-0.189773117	-0.202577065	-0.253565702	2.45766873	-0.301001975	0.081469496	0.107006524	0.814200613	1.063929522	1.113152022	1.33251186	0.517707375	-0.440425777	-0.024627819	-0.213919423	2.487151903	NaN	0.661394628	-0.195774573
13.2	0.361146128	-0.21797753	0.667284511	-0.203014478	-0.042184066	-0.214215357	-0.176179622	-0.258307148	2.454607592	-0.266935619	0.01231395	-0.091273412	0.831788409	1.235042434	0.961671534	1.415831952	0.406025569	-0.389200228	-0.016221145	-0.207309548	2.40199193	NaN	0.354714452	-0.157524179
13.4	0.258213687	-0.217802602	0.558431956	-0.231671748	-0.090256968	-0.195334825	-0.178044981	-0.275418154	2.540574156	-0.331859697	-0.03444385	-0.25167055	0.873183048	1.107925467	0.909113507	1.163540455	0.409347799	-0.345734967	0.00023883	-0.160265166	1.783395008	NaN	0.181874616	-0.091917984
13.6	0.197013851	-0.279288881	0.460342119	-0.286957384	-0.170617695	-0.227249246	-0.233382711	-0.314366181	2.597264035	-0.265090475	-0.015877616	-0.277389344	0.93643419	0.902572482	0.737329035	0.908471336	0.343405214	-0.378826566	-0.01638437	-0.132472246	1.556779648	NaN	0.407044663	-0.279257245
13.8	0.163099317	-0.322339153	0.309027079	-0.294067176	-0.258361311	-0.164238881	-0.311525424	-0.27022195	2.540064689	-0.293303694	-0.143651255	-0.349092855	0.934758728	0.793154829	0.704449912	0.741216913	0.273098775	-0.438376248	-0.032201242	-0.173312778	1.159246862	NaN	0.965896603	0.012322885
14	0.170659536	-0.358250599	0.225674596	-0.296824982	-0.237030662	-0.220601221	-0.325513274	-0.264647367	2.362726485	-0.337454472	-0.224536124	-0.241963255	1.000101721	0.680251611	0.800253033	0.895789693	0.229364935	-0.375840947	-0.082396226	-0.196932187	1.627323619	NaN	0.712509315	0.352641876
14.2	0.16968959	-0.287756279	0.216950516	-0.250007578	-0.247959806	-0.215244175	-0.32024963	-0.274651183	2.115260184	-0.272881885	-0.137106956	-0.090682369	0.888640381	0.565298726	0.81418001	0.816067071	0.236530843	-0.294344962	-0.124053876	-0.198844771	1.345846128	NaN	0.576941843	0.290868143
14.4	0.240973132	-0.250257341	0.236768503	-0.237209477	-0.250203075	-0.250536073	-0.376290182	-0.241451224	1.86990225	-0.347679476	-0.050144846	0.063065533	0.741992334	0.442279084	0.548464697	1.165598036	0.206592626	-0.26297451	-0.188768754	-0.160554417	1.468221399	NaN	0.725696034	0.336576351
14.6	0.254480773	-0.236918177	0.281863026	-0.225636453	-0.249021302	-0.178551372	-0.37147991	-0.15720638	1.544793044	-0.330893959	NaN	NaN	0.650497289	0.296522758	0.473610531	1.29398365	0.189890752	-0.198629847	-0.162009514	-0.138873881	1.638227227	NaN	0.555102981	0.068997698
14.8	NaN	NaN	NaN	NaN	NaN	NaN	NaN	NaN	1.434451185	-0.307684747	NaN	NaN	NaN	NaN	NaN	NaN	NaN	NaN	NaN	NaN	NaN	NaN	NaN	NaN
15	NaN	NaN	NaN	NaN	NaN	NaN	NaN	NaN	1.259641283	-0.293356911	NaN	NaN	NaN	NaN	NaN	NaN	NaN	NaN	NaN	NaN	NaN	NaN	NaN	NaN
