# Supplementary material for: Circuits for integrating learned and innate valences in the insect brain
Source: eLife journal article supplement (doi:10.7554/elife.62567), 2021-11-10
Supplement: supp [file elife-62567-supp-v1.zip › elife_poa_e62567_Figure_4_source_data_3.csv]

Individual GCaMP fluorescence values in response to Kenyon cells optogenetic activation by MBON-m1
Fluorescence values of the selected ROI over time for each repeats and each individuals as plotted in Figure 4d.
	indiv1_		indiv2_		indiv3_		indiv4_		indiv5_				indiv6_				indiv7_				indiv8_				indiv9_		indiv10				indiv11				indiv12
normalised time (s)	repeat_1	repeat_2	repeat_1	repeat_2	repeat_1	repeat_2	repeat_1	repeat_2	repeat_1	repeat_2	repeat_3	repeat_4	repeat_1	repeat_2	repeat_3	repeat_4	repeat_1	repeat_2	repeat_3	repeat_4	repeat_1	repeat_2	repeat_3	repeat_4	repeat_1	repeat_2	repeat_1	repeat_2	repeat_3	repeat_4	repeat_1	repeat_2	repeat_3	repeat_4	repeat_1	repeat_2	repeat_3	repeat_4
0	0.06914948	0.143492943	-0.180280263	-0.09114136	0.121864615	-0.029245383	-0.19115444	0.168466918	NaN	NaN	NaN	NaN	NaN	NaN	NaN	NaN	NaN	NaN	NaN	NaN	NaN	NaN	NaN	NaN	NaN	NaN	NaN	NaN	NaN	NaN	NaN	NaN	NaN	NaN	NaN	NaN	NaN	NaN
0.2	-0.033016374	0.083728953	-0.200848486	-0.061083952	0.123000359	0.015109461	-0.343967268	0.268321586	-0.033402867	0.303897937	-0.147490078	0.142433742	0.016911398	0.311016918	0.059757277	0.000510242	-0.21109827	-0.301656431	-0.113489696	-0.067996586	0.103381062	0.010099452	-0.109300461	-0.055506059	-0.014446956	0.021461641	-0.071028703	0.117932328	0.144553476	-0.100584664	0.029464822	-0.009597765	0.001634132	-0.050931586	0.094473114	0.007984006	-0.084480443	0.350724913
0.4	0.02057447	-0.052222053	-0.173438671	-0.045769091	-0.017925157	-0.127508239	-0.223962321	0.290124596	-0.1180717	0.146572952	-0.133643283	0.04632834	0.113040018	0.062951107	-0.083565893	0.077885856	-0.210699595	-0.282283733	-0.183155316	0.087084944	0.022699962	0.062910124	-0.053349959	-0.030992016	0.05014516	-0.127293828	0.016426801	0.137027255	0.02729824	-0.099415236	0.04262526	0.099238157	0.025454909	0.044732984	0.05185859	-0.089418908	0.175615812	0.13117088
0.6	-0.161552728	-0.012315563	-0.109391721	-0.034111808	0.032892584	0.083424564	-0.253366659	0.1597068	0.04896034	-0.066283273	-0.121763808	-0.008985885	-0.176227165	0.32894225	-0.568347026	-0.115595617	-0.174112283	-0.201023909	-0.116998289	0.127485365	0.012208206	0.055814925	-0.11021549	0.023990272	0.055699371	0.169789688	0.167808075	-0.074334361	0.117112704	-0.144393887	-0.064670863	0.105343578	-0.039635782	0.091167174	-0.132127172	0.142944099	-0.241223176	0.400949873
0.8	-0.130467496	-0.083168326	-0.075755247	0.020746429	0.113538678	-0.036355629	-0.017209792	0.237461823	0.191479803	-0.427546315	0.006397365	-0.107970115	-0.116510579	0.056805487	0.099302638	-0.152397182	-0.186212769	-0.150191317	-0.056630505	0.079635737	-0.015354747	0.075595076	-0.027729717	-0.070452572	-0.061650578	0.067593301	0.00206983	-0.148715952	0.04207337	-0.195387124	-0.082851386	0.037375963	-0.029961386	0.046827981	-0.035783291	-0.068901605	-0.166150406	0.219183095
1	-0.050722522	-0.052200839	-0.080334122	-0.010714693	0.072511468	0.027756598	-0.268550694	0.141642241	0.106299323	-0.345015804	0.020389802	-0.172976521	-0.161104798	0.092392578	-0.126328362	-0.050012318	-0.190745292	-0.065414881	-0.065272167	0.087879301	0.030442606	0.046216201	0.007891984	0.030033107	0.070718337	-0.000128989	0.014119537	-0.361560422	0.167714068	-0.23451899	0.000766149	0.041358197	0.007450888	-0.002127409	0.001267184	0.029015618	0.199464159	0.196948664
1.2	-0.040678957	-0.002394145	-0.08832534	-0.032919072	0.04943084	0.011706064	-0.030318456	-0.029159236	0.119104052	-0.144960858	0.049289549	-0.03760205	0.095855947	-0.010506379	0.496077605	0.114468376	-0.1676253	-0.005021692	-0.045874389	0.146577694	0.010633511	-0.04459743	-0.016451639	-0.023045928	0.000518226	-0.232049927	-0.198583186	-0.20918559	0.088718208	-0.18688074	0.05674696	-0.011906777	0.033807046	0.013921996	-0.303488658	0.132958626	-0.117332071	0.141402625
1.4	0.036239477	-0.035873701	-0.065129343	-0.012550602	-0.056560209	0.078762262	-0.034778387	-0.043708333	-0.198080512	0.014921985	-0.081069607	0.004370027	-0.018455124	0.089881081	0.633004233	0.13064982	-0.132249035	0.00630912	-0.059091787	-0.003269972	-0.01442177	-0.022038809	-0.057745944	-0.076924435	-0.044368537	-0.159868054	-0.384222223	-0.175497737	-0.070926066	-0.220454359	-0.009365606	0.036819177	-2.59E-05	-0.007651957	-0.221499441	-0.051065443	-0.066336867	0.06523923
1.6	-0.009359203	-0.025763647	-0.024502496	0.04147908	0.01806887	-0.05815693	-0.074622295	0.06194292	0.002018072	0.108412027	0.058047989	0.06222927	-0.182303518	0.239298093	0.404262254	0.042819642	-0.022372142	0.02149296	-0.016487962	0.061353405	0.020401695	0.003128003	-0.013444474	-0.020184	0.029030684	0.077286666	-0.228794983	-0.29881411	-0.049142238	-0.226506816	-0.038496641	0.071183328	0.026029124	0.051011767	0.037449011	0.044570558	0.140410106	-0.009327677
1.8	-0.14994197	0.075023617	-0.050838568	0.029605917	-0.019404934	-0.069308825	0.043440133	0.077675637	0.082536405	0.05017666	-0.010004278	0.055029479	0.014252649	0.172353891	0.318920129	0.177644098	-0.003942172	0.04548154	0.029479147	-0.003973872	-0.005129258	0.000234498	0.031690332	0.039529739	-0.095171396	0.034509178	-0.150476848	-0.39815818	-0.123781684	-0.236510083	-0.033592951	-0.027293048	0.005623666	0.029630893	0.087059556	-0.146254703	0.015815796	-0.061065215
2	0.061683259	0.023147561	-0.046866921	0.123518664	-0.004506984	0.075545541	-0.048782194	-0.010314344	0.012867688	0.046716399	-0.047226882	0.009482127	-0.04856486	0.039359493	0.169697084	0.218924999	0.042507216	0.029177189	0.047588265	-0.147875185	0.002661614	0.043289232	0.062666099	0.044217535	-0.145880686	0.084384663	0.009020239	-0.140726206	-0.064034695	-0.180915796	-0.065213941	-0.084241423	-0.0165769	0.058481051	0.089167218	0.024089369	-0.096609364	0.0928848
2.2	0.125149373	0.146626931	0.068376255	0.090904614	-0.336208546	0.033052862	-0.10249985	0.030867233	0.061698365	0.039966202	-0.00020706	0.005164767	-0.046024947	-0.027905815	-0.059904323	0.239326284	0.037643191	0.051676086	0.011778618	-0.087765353	0.020318174	0.005756006	0.0460854	0.01887208	-0.001430722	-0.127065453	-0.075089535	-0.001482262	-0.005291849	-0.050396585	-0.044920612	-0.008147007	-0.018453057	0.030151814	-0.03786877	0.209437419	-0.22490954	0.104426026
2.4	-0.097162232	-0.181054871	-0.076629361	-0.023259333	-0.079065706	-0.02450684	-0.095868264	0.05140458	0.081165629	0.083408811	-0.032045887	0.022778361	0.138398178	-0.066900045	-0.295468678	0.05561653	0.017096434	0.057938004	-0.015348618	0.047270086	0.062737204	-0.038133239	0.067923705	0.015136064	-0.00795582	-0.129792582	-0.170393828	0.121951012	-0.026419191	0.090684601	-0.040162536	-0.030834308	-0.071695945	-0.019010772	-0.113297543	0.048689807	-0.152027771	0.098054257
2.6	0.09690928	-0.119900388	0.058704548	0.014475184	-0.070454655	-0.062145386	-0.007766695	0.06431172	0.114100692	0.056924988	0.04372582	0.016018714	-0.024042042	0.188351499	-0.183418966	0.052959567	0.037091683	0.016225242	0.009008069	-0.040530875	0.098865183	-0.066519839	0.103994516	0.00643141	0.136969128	-0.131388084	-0.215141891	0.247969291	-0.030977867	0.21965969	-0.064930266	-0.003082998	-0.10014969	-0.025051726	-0.069841253	-0.169982993	-0.238672811	-0.086078165
2.8	0.045281483	-0.06291951	0.147128922	-0.009783134	-0.036785192	-0.022111925	-0.183153644	0.052890356	0.027229877	-0.089951243	0.081246512	-0.094740393	-0.18011095	0.118393341	0.299927442	0.01561844	0.046903628	0.004594594	0.066459429	-0.056691911	0.049002782	-0.050445731	0.072161316	0.030883933	0.055321682	-0.096582322	-0.172710593	0.117762731	-0.023913785	0.207251518	0.023916215	0.073924504	0.00412202	0.012739414	-0.079005326	0.042295085	-0.173838902	-0.069318646
3	0.055785123	-0.190064093	0.0765956	-0.029550504	-0.038250085	-0.047704363	-0.150300026	-0.02746214	-0.105909294	-0.07845149	0.039232496	-0.114532859	-0.231616866	-0.122555462	0.174075518	-0.096164421	0.041345348	0.069498733	0.079687863	0.016370997	-0.007075797	-0.000164226	-0.027260008	0.023835261	0.016076698	-0.000299178	-0.059101136	-0.015667439	-0.046439224	0.13924444	0.035579469	-0.006946205	0.007365212	-0.021013906	-0.119640769	0.054098715	-0.040148728	-0.041333791
3.2	-0.019350735	-0.081595707	0.081453159	0.032815075	-0.009205347	-0.102798141	-0.016011813	-0.122907812	-0.184943508	0.004687877	-0.064031391	-0.037896888	-0.094048077	-0.047804158	-0.133002493	-0.041745391	0.048204052	0.09750538	0.106501988	0.055268774	-0.001943403	0.022279989	-0.037310079	-0.014262065	0.100526676	0.030529584	0.015424098	-0.114149091	-0.050295739	0.059615842	-0.022881111	-0.045995587	-0.025763099	-0.027995442	-0.058101788	0.188030188	-0.015317344	-0.102118946
3.4	-0.052729905	-0.01020399	-0.001306487	0.02772215	0.020918418	-0.049666525	0.056241863	-0.042331393	-0.271183831	0.003728356	-0.137544059	-0.003176293	-0.026251898	0.025360876	-0.198593692	-0.050378532	0.065702102	0.084388489	0.110182588	0.010885564	-0.0272311	0.026099357	0.033689506	0.005470763	0.036021154	0.021453286	-0.014554912	-0.083753917	-0.052375339	0.038791055	0.020143232	0.003174046	-0.003524516	-0.028961014	0.021049981	0.204410647	0.057220176	-0.060907428
3.6	-0.015852116	-0.031749987	0.124115559	0.060565701	-0.059730109	0.000295186	0.247144298	0.014511461	-0.221072802	0.09789528	-0.067614917	-0.001492736	-0.119283088	-0.115027799	-0.136895129	-0.090592288	0.111496678	0.086320519	0.109253371	0.007892387	-0.040223485	0.00702217	0.020492492	-0.041667748	0.047684213	0.007655279	-0.001659816	-0.046930264	-0.00670191	0.064669698	0.050196369	-0.016818167	0.010598948	-0.050944865	-0.150511283	-0.019494357	0.037525519	-0.058591799
3.8	0.042255229	0.044792968	0.043576258	-0.014186094	-0.072365121	-0.028619837	0.440806707	-0.200132246	-0.046894402	0.18302784	0.026378902	0.003823941	0.096200554	-0.159268511	0.066536659	-0.090102029	0.151918125	0.05133374	0.100856227	-0.061789314	-0.058111429	-0.007767272	-0.056383721	-0.065902721	0.064898514	0.066633117	0.07302962	0.053159596	0.002947263	0.11590967	0.03505653	-0.015648442	0.017110764	-0.038733236	-0.16714593	0.025759107	0.008983769	-0.108690478
4	-0.047181615	0.081033762	0.008457784	0.013911167	-0.010466887	-0.02330032	0.304612449	-0.290143804	0.040147033	0.05543678	0.050763605	0.001368939	0.245097754	-0.017651608	0.01175322	-0.181446512	0.157003367	0.014241552	0.066772203	-0.085801071	-0.100919042	-0.001783926	-0.06768092	0.026470814	-0.036376253	0.166265138	0.128573777	0.263288768	-0.075080611	0.174174057	0.05868885	0.00087065	0.006560094	-0.073226777	0.087789503	0.000694787	0.128812088	-0.187918708
4.2	0.22528979	-0.016384144	0.105134352	0.025368993	0.042055997	0.022800453	0.318272396	-0.21457323	0.105020117	-0.080512457	0.076868363	-0.028654501	0.209955003	-0.112021549	-0.182355967	-0.233461176	0.14993207	0.072942895	0.060873389	0.058116896	-0.063959016	-0.019851075	-0.025733293	0.02290189	-0.053290713	0.190372221	0.300989548	0.237055974	-0.038311977	0.130790496	0.0257093	-0.003116618	-0.005873107	-0.067010413	0.208820039	-0.08807138	0.262799758	-0.270402156
4.4	0.029488452	0.095507481	0.130976067	-0.077953695	-0.026600535	0.10453627	0.216380284	-0.050966338	0.140035532	-0.068009418	0.104290663	0.009565222	0.225453622	-0.426206928	-0.208361215	-0.1816522	0.121682222	0.133502605	-0.014757759	0.006749444	-0.043223952	-0.029989583	-0.003779033	0.009440063	-0.039211306	0.119525878	0.390410873	0.314412115	0.015471107	0.144717378	-0.006996337	-0.001876051	0.000761845	0.00197258	0.368292358	-0.099242686	0.332823874	-0.219391361
4.6	0.132190315	0.34297202	0.12324595	-0.068743914	0.010262636	-0.037209646	0.238100397	-0.093771848	0.047218307	-0.005346919	0.077084125	0.100491745	0.01073204	-0.34418594	-0.074835732	-0.031239469	0.10698466	0.082143605	-0.049142026	-0.006042396	-0.017942354	-0.033934112	0.04030065	0.044890189	-0.058983182	-0.066630269	0.226973673	0.322777305	-0.008190849	0.193397976	0.023751997	-0.054235243	0.045204262	-0.01021927	0.358365491	-0.159515214	0.154321136	-0.149053891
4.8	0.067639182	0.132568046	0.151527845	-0.004844111	0.150434848	0.047696766	0.127255325	-0.205845799	0.000586351	0.038008565	0.098700405	0.078862809	0.215780165	-0.112124445	-0.024140125	0.075376176	0.095653982	0.041727407	-0.03254193	-0.159723417	0.00471491	-0.029202114	0.083626876	0.042314991	-0.094517195	-0.094154826	0.208550631	0.065312143	0.025760296	0.150298308	-0.012186354	-0.04602134	0.060818535	0.008861121	0.191336562	-0.199859656	0.014253564	-0.15179866
5	-0.061154555	0.008444317	0.118493211	-0.021439098	0.124191892	-0.035363238	0.166928066	-0.220962908	0.015435922	0.058762368	0.121775258	0.051102628	0.139618172	-0.338795568	-0.617215138	0.078966518	0.079305469	0.051695754	-0.049095845	-0.07510593	-0.037215864	-0.022699735	0.04020225	-0.010315834	-0.006153854	0.130765026	0.177763844	0.121428907	0.030108682	0.188849137	0.080811756	-0.136920021	0.063599158	0.031156773	-0.155813585	-0.134380092	0.06180735	-0.311738395
5.2	0.078474987	0.036014259	0.114376903	0.000976959	0.059754401	-0.006596187	0.191902249	-0.15266563	0.124138739	-0.007986449	0.092421795	0.001256828	0.180730641	-0.517720438	-0.511797433	-0.031605542	0.093450542	0.093537935	-0.025620091	0.026365732	0.011165587	-0.019122695	0.01761631	-0.066590454	0.107031468	0.060547625	-0.072218367	0.128861822	-0.023131976	0.133398643	0.000448015	-0.106645812	0.002634695	0.023978235	0.030608577	-0.187914779	0.006085965	-0.226217746
5.4	0.032305677	0.140723659	0.298928351	-0.032988221	0.017243292	0.040848951	0.049762242	-0.165034408	0.414387	0.317908949	0.290059691	0.174057048	0.026639152	-0.018600952	-0.17012822	-0.007358645	0.138276279	0.104639336	0.066241475	0.161164489	0.016441987	0.071563501	0.050011776	0.02861979	0.217324254	-0.03702529	-0.016036091	0.135897755	0.185359235	0.100676301	0.040940839	-0.092035181	-0.013028077	0.059266388	0.623748546	0.265701336	0.340469339	0.092681776
5.6	-0.146830662	0.178951788	0.447650392	0.054508653	-0.074238049	-0.126244898	-0.003289423	-0.065814642	0.877356146	0.76320214	0.729188088	0.579216605	0.428256629	0.535374703	0.497325027	-0.047430165	0.200952172	0.28221966	0.154601193	0.307875773	0.079730376	0.222968646	0.175139067	0.145505673	0.105252211	-0.118654132	-0.064153448	0.435859043	0.425370592	0.367902589	0.062453227	-0.026304397	0.049480574	0.064426842	0.285642576	0.439773393	0.341629667	0.443552051
5.8	-0.208760897	0.192677376	0.584685907	0.154025772	-0.045571612	-0.243850997	-0.064975906	-0.163405956	1.095771372	1.090545417	1.020632052	0.814657611	0.270022948	0.775773614	-0.223093686	0.233921923	0.230243687	0.35621196	0.135421298	0.480091505	0.211294435	0.366011817	0.276265909	0.418660048	-0.189906538	-0.107440614	0.386438418	0.359402326	0.665607976	0.409803198	0.061183571	0.118220979	0.045300355	0.193029198	0.459771701	0.35098122	0.593795391	0.584221428
6	-0.246699355	0.031908034	0.731671861	0.196193854	-0.018094929	-0.159960732	-0.190810704	-0.002760385	1.079835685	1.041346826	0.989956832	0.885956892	0.486487219	0.616145739	-0.151423177	0.269347984	0.232238566	0.315861535	0.093373185	0.872990114	0.305191073	0.483618586	0.355679391	0.433516197	-0.039933705	0.046522723	0.409904482	0.548645439	0.733631534	0.447184944	0.024299066	0.180298986	0.063830052	0.1680749	0.601303296	0.634020024	0.580756463	0.806587308
6.2	-0.17806442	0.04746642	0.684068154	0.184529957	-0.203403372	0.04787606	-0.186899856	-0.061807899	1.13964522	1.088993539	1.076842666	0.778418629	0.378505678	0.043110437	-0.183743537	0.366963638	0.232248623	0.318950736	0.088196591	1.198381039	0.256029905	0.535966986	0.378664205	0.510959548	0.077191876	-0.08626043	0.309973976	0.699046707	0.82280386	0.531450196	0.164307531	0.262723746	0.080979286	0.227792701	0.392344382	0.660833356	0.508685672	0.691493219
6.4	-0.201897225	0.018015742	0.758592485	0.215691748	-0.237399382	-0.109937496	-0.223161581	0.071264999	0.978899594	1.101989191	0.976608502	0.783419023	0.348203629	0.297995813	-0.360587329	-0.155455494	0.270776214	0.276280737	0.11014926	1.432211308	0.340566101	0.495751651	0.376657452	0.501134685	-0.135012156	-0.258569744	0.267724545	0.671618024	0.849600505	0.483606295	0.119288667	0.292479463	0.09179004	0.300576562	0.714161373	0.304100507	0.609076522	0.62661515
6.6	-0.201481774	0.102395712	0.825446753	0.197528034	-0.273023472	-0.100362943	-0.261507866	-0.236394265	0.9775302	1.077525995	0.935338695	0.883578947	0.510414034	0.319952718	0.18071283	-0.021880556	0.270630236	0.288615727	0.209283713	1.444185467	0.257895949	0.595628536	0.36233738	0.711558347	0.153077281	0.149661285	0.190010991	0.703530462	0.793588933	0.479814381	0.08579625	0.341241633	0.098110858	0.377794205	0.280812175	0.518345934	0.481765198	0.664960153
6.8	-0.105519471	-0.040859399	0.774409241	0.294720089	-0.240689302	-0.165470745	-0.218298567	0.054041307	1.029348013	1.078246796	1.1908077	0.9558965	0.746027946	0.149772905	0.72263166	0.19275094	0.223956623	0.195835502	0.276475118	1.587868919	0.274599091	0.610158563	0.34991681	0.66114902	-0.124811934	0.325273079	0.434405842	0.59126445	1.038318607	0.504458987	0.188605713	0.186660401	0.165924055	0.181799513	0.547816449	0.471601825	0.746031839	0.533224477
7	-0.268263104	0.15289061	0.761516241	0.291705198	-0.11336616	-0.026308599	-0.02666742	0.092858764	1.05038795	0.988392464	1.202704247	0.969744787	0.710224552	0.204670234	0.540251063	-0.023206007	0.275114707	0.242689107	0.258230959	1.389658628	0.330303939	0.514662701	0.387463056	0.620711775	-0.000766911	-0.036590808	0.266675142	1.114976609	0.998024825	0.706190321	0.266722032	0.207811519	0.103848931	0.158715962	0.187461035	0.526194197	0.509502934	0.764752312
7.2	-0.122715467	0.040664889	0.681494754	0.203926776	0.080915935	0.004467425	-0.002471555	0.156664747	1.125044639	0.856336617	1.341295796	0.971982274	0.347229742	0.13678194	0.487138503	-0.360993673	0.259247865	0.18362328	0.306173422	1.592467893	0.399967446	0.530343596	0.451791979	0.675760755	-0.051992911	0.190974473	0.270538164	0.726135727	0.988285039	0.581970331	0.193340602	0.220796722	0.135926537	0.214443834	0.495798624	0.336909453	0.397040028	0.607202361
7.4	-0.315280945	-0.018999458	0.813761178	0.328707401	-0.132175548	-0.033494234	-0.102877184	-0.130086105	1.042726639	0.864140138	1.234664446	0.852809118	0.657987091	0.161096865	0.449394354	0.140796331	0.199299425	0.209158842	0.236710583	1.631499264	0.352029682	0.589087297	0.440055029	0.779075093	0.062629418	0.240013466	0.558386964	0.663216019	0.93980278	0.532191493	0.219807019	0.142043514	0.119438113	0.205705859	0.275936155	0.427579232	0.19442743	0.541059286
7.6	-0.226819743	-0.053451389	0.758496765	0.28368059	-0.037233817	0.066409843	-0.316406556	0.003800534	1.082363552	1.207429421	1.320325282	0.958430169	0.475406284	0.164662126	0.54769011	0.487345515	0.302412106	0.143065661	0.304895593	1.621830278	0.428028283	0.655276253	0.544057602	0.677349233	0.007072336	0.18320259	0.142665974	0.395852986	0.789489772	0.485280117	0.196418026	0.14836953	0.103616014	0.184693498	0.414628323	0.580278409	0.437946526	0.707532614
7.8	-0.212794028	0.131718717	0.699669286	0.295948713	-0.106578521	-0.000863623	-0.117983139	0.051125191	1.069601666	1.012785276	1.227438767	1.095758974	0.305703274	0.226210461	0.854223706	0.501005403	0.30819962	0.127575212	0.28802557	1.915932403	0.411522542	0.596828479	0.473286929	0.744668624	0.047737646	0.104817539	0.302184084	0.573795978	0.929602922	0.581648639	0.053106794	0.211861867	0.105002371	0.240879482	0.106705165	0.259098004	0.271372045	0.599139403
8	-0.227897832	-0.001966616	0.722009991	0.293565163	-0.070014509	0.134130249	-0.162789218	-0.215043869	1.092128294	0.896081162	1.129372662	0.919807556	0.176387433	0.132529197	1.151955189	0.694093189	0.257652986	0.093190021	0.270966356	1.644475206	0.378425686	0.656924187	0.39044165	0.643874184	0.067796683	0.139956126	0.482837969	0.518061743	1.007977679	0.661225305	0.149394589	0.201953212	0.120827406	0.195287352	0.717325446	0.390558787	0.529404891	0.463247961
8.2	-0.290030464	0.026519082	0.789466754	0.271672937	0.014978308	-0.002423617	-0.001434403	-0.109119668	1.205788811	0.872375672	1.255562058	0.966976143	0.375511081	-0.048529561	1.535869273	0.839195678	0.257935605	0.080056745	0.026839188	1.738360843	0.42325575	0.627045457	0.461398991	0.592218092	-0.051527796	0.094594642	0.500438576	0.747864736	1.047494326	0.647683743	0.167347495	0.159029709	0.123620684	0.176126329	0.561811433	0.51338985	0.567893186	0.646488851
8.4	-0.338208749	-0.161865395	0.756653599	0.279556869	-0.147692758	0.129425586	-0.024479885	0.096106784	1.080406641	0.791958754	1.267822708	0.96579859	0.501002606	0.046294777	1.574732693	0.514815534	0.230357458	0.099964587	-0.073514507	1.441686094	0.405899267	0.630608737	0.40954746	0.647789478	-0.048819552	-0.031125833	0.433446205	0.774379214	1.033100822	0.677974716	0.077612612	0.173057226	0.090804783	0.187210509	0.365875864	0.256557355	0.594949533	0.504022569
8.6	-0.292703911	-0.061623158	0.713828905	0.271484372	0.028852859	0.044765399	-0.069036051	-0.07002372	1.023550824	0.643172936	1.050200978	0.839332079	0.315522773	0.025473721	1.157099743	0.226138226	0.221952907	0.123610065	0.026830488	1.304212918	0.37701481	0.608047028	0.376979428	0.628265369	-0.036293143	-0.245400016	0.262497211	0.924612436	0.88778048	0.653738586	0.080956008	0.189259677	0.080258827	0.176740051	0.249301698	0.316572888	0.32919536	0.745120113
8.8	-0.288774881	-0.166343615	0.650421567	0.247723832	-0.070495421	0.076705276	0.052561541	-0.041018791	0.714560273	0.629946755	0.914672965	0.663650525	0.226507116	-0.043615163	1.015133705	0.257208675	0.243375762	0.11171518	0.059705413	1.125755869	0.36361199	0.619602111	0.377642535	0.664199124	0.097569773	0.023059692	0.35330578	0.71759483	0.980391847	0.593989293	0.100729497	0.254655052	0.125594944	0.193953965	0.307519289	0.361406558	0.292031777	0.483422766
9	-0.228285774	-0.103221369	0.627473993	0.152442315	-0.305733352	-0.145940759	0.012467286	-0.228791408	0.485371582	0.543901856	0.786713488	0.530915854	0.18512947	-0.153977902	1.186347097	0.097561718	0.253913884	0.073967893	0.042675793	1.081434374	0.337641927	0.574633121	0.327237945	0.657202065	0.053724521	-0.00510534	0.24447601	0.809608192	0.847900979	0.539078326	0.022671314	0.183611238	0.038586009	0.195031054	0.440853962	0.334101663	0.286987186	0.339641863
9.2	-0.203589883	-0.162692246	0.607822441	0.075732487	-0.077304432	-0.183408076	-0.151925061	0.020333115	0.478910525	0.264209792	0.655481185	0.37330917	0.172163866	-0.278488179	1.344973338	0.093756033	0.186894679	0.071630836	0.033737143	0.919800746	0.321458784	0.517235076	0.352168573	0.549741722	-0.077440636	0.052014896	0.033710187	0.470048591	0.743051972	0.320455963	-0.001025085	0.09781323	0.019459251	0.142736306	0.627529483	0.136574184	0.39528681	0.139078009
9.4	-0.28338988	-0.206399347	0.615655196	0.12645368	-0.304697564	-0.152778671	-0.046888227	-0.169857069	0.449693243	0.391790254	0.557384752	0.383313203	0.02027938	-0.177617082	0.395691449	0.009177757	0.138356616	0.049208067	-0.014894936	0.843657703	0.321702545	0.514696048	0.361200621	0.486668227	-0.065699893	0.178141136	0.186202597	0.328914981	0.67601755	0.243049124	0.013687637	0.098059896	-0.001316301	0.157401863	0.722307304	0.118490349	0.269866154	0.045403177
9.6	-0.274448708	-0.10649097	0.610818705	0.061090738	-0.230765005	-0.139600501	-0.100083346	0.000388617	0.304375537	0.45580536	0.514330343	0.388457451	-0.005154271	0.015069336	0.171558833	0.051426817	0.210384198	0.082569525	-0.033749639	0.788918271	0.31593518	0.486961018	0.281094359	0.495619137	0.028794845	0.106059459	0.244977581	0.38829036	0.690159592	0.213654369	-0.003362112	0.151679555	0.003261306	0.155836806	0.486433127	0.161559135	0.07664326	0.067764016
9.8	-0.043023591	0.056506602	0.532159261	0.031247219	-0.074793141	-0.106862771	-0.073548813	-0.216092307	0.163375834	0.344259018	0.477912392	0.221676522	0.180029026	-0.106514405	0.498390137	-0.05892169	0.20894742	0.076738857	0.066114743	0.702105761	0.306697758	0.52608374	0.20603031	0.535631216	0.093063641	0.050417036	0.074428518	0.275717084	0.604393854	0.151558805	-0.026292867	0.093686024	-0.02926517	0.069075335	0.224464147	0.14344017	0.010364999	0.168686827
10	-0.08327874	-0.141029834	0.503316421	0.01715905	-0.04838931	-0.082509353	0.033673867	-0.135053967	0.288000532	0.264482688	0.474839753	0.190522227	0.230710131	-0.137655847	0.600772348	0.080444634	0.165137602	0.06980935	0.096676394	0.628190568	0.298708398	0.539210266	0.191638663	0.485386768	0.035155896	0.02487898	-0.135735634	0.161134271	0.448432824	0.08026425	-0.065464174	0.065667989	-0.001019571	0.088215071	0.178365844	0.208186104	0.049843838	0.258335232
10.2	-0.085669142	-0.065300311	0.511786063	0.005893979	-0.069842922	-0.001633021	-0.064391678	-0.118144107	0.37063002	0.257286843	0.519916635	0.154923593	0.292636036	-0.075360628	0.440470807	0.241409931	0.147441224	0.103576478	0.033524433	0.639796696	0.294432913	0.419979846	0.2314252	0.379907687	0.108456064	-0.056867318	-0.033002666	0.204943168	0.391840861	0.045661599	-0.036458866	0.117233403	0.058416735	0.100249768	0.065853076	0.052951965	0.013920318	0.197580234
10.4	-0.036063871	-0.106365483	0.57021242	0.025436578	-0.031034799	0.047258393	-0.047499309	-0.265371481	0.221449319	0.305732606	0.626796049	0.191606907	0.287864219	-0.145961263	0.065278209	0.122451361	0.115085089	0.118697253	0.008553731	0.615771326	0.23143008	0.384360082	0.205242498	0.29912044	0.169459208	-0.058416628	-0.173839965	0.2935396	0.348051675	0.031419188	0.054636956	0.077984025	0.078873959	0.044416254	-0.016675937	0.13498647	-0.02063189	0.123449286
10.6	-0.076277631	-0.192731665	0.503434549	0.017503337	-0.050619889	0.169671719	-0.049998253	-0.244183813	0.09427808	0.34515302	0.605247353	0.324264635	0.078730343	-0.169993811	-0.22607858	0.090307445	0.083515059	0.086819299	-0.037885619	0.703461122	0.163598889	0.379026392	0.132983992	0.256782907	0.170712585	-0.103750986	-0.306738681	0.343304836	0.342712822	0.006673362	0.019296899	0.045491526	0.046770087	0.046656188	-0.009260532	0.33559638	0.089333305	-0.060535804
10.8	-0.188057952	-0.197400292	0.482321997	-0.001903817	-0.117025737	0.16901556	-0.078526854	-0.13246543	0.032395223	0.384978993	0.491208549	0.357115202	0.077854818	-0.086776465	0.172494065	0.196763785	0.099956965	0.071621332	-0.053684261	0.759494094	0.134118995	0.276194056	0.135923845	0.199417128	0.179557956	-0.081503892	-0.274719708	0.3576697	0.369631607	0.004466687	-0.048137194	0.094627435	0.007836778	0.096181251	0.02255432	0.417136587	0.15026242	-0.097625295
11	-0.258281367	-0.066800688	0.556242255	0.036994267	-0.161318546	0.024918341	-0.037069586	0.002629058	0.009103436	0.383358671	0.398884584	0.33067355	0.128863706	0.028598434	0.691564912	0.245735112	0.111650539	0.057790829	-0.019316641	0.507938979	0.126902446	0.240555089	0.11794657	0.143755612	0.13785683	0.030986224	-0.25368939	0.441555094	0.322747921	0.02952371	-0.029921144	0.031694841	-0.002761197	0.082505102	0.227777759	0.541084733	0.287457481	0.086582716
11.2	-0.150224195	-0.037855569	0.504949748	0.070106144	-0.056309561	0.048971871	-0.153063294	0.014021084	-0.038528006	0.291897645	0.299484126	0.295764587	-0.043412318	-0.057129097	0.363738205	0.221095225	0.084695295	0.006571651	-0.037620479	0.360594854	0.118933498	0.243517133	0.015958381	0.187110245	0.146108828	-0.002014566	-0.195247985	0.502314031	0.248646769	0.020208771	0.015895757	-0.078667395	-0.008174922	0.030522878	0.45867978	0.337108901	0.404972851	0.039269397
11.4	-0.176672201	-0.111023032	0.619874048	-0.003784447	-0.058770871	0.133448423	-0.13446267	-0.250170448	-0.12537802	0.242096296	0.256160514	0.332152066	-0.138345087	-0.260373433	0.304481926	0.216675251	0.054634334	-0.012742536	-0.052401053	0.454035778	0.097793275	0.19316424	-0.029727651	0.192185845	0.142364008	0.030413754	-0.281637955	0.511068785	0.219854831	0.01486899	0.049338066	-0.041779445	-0.005685238	0.035159982	0.363834447	0.179328821	0.301091344	0.004693258
11.6	0.014530093	-0.041488941	0.532366838	-0.032593648	-0.102265467	0.132529712	-0.102790892	-0.034468749	-0.135284338	0.319449889	0.266747415	0.43795212	-0.111228441	-0.292694518	0.801664879	0.327822038	0.054535401	0.011549502	-0.053335604	0.505416175	0.095865434	0.159017182	-0.01053406	0.120707194	0.073520072	0.126307992	-0.114070882	0.692430991	0.209077864	0.081705169	0.034626649	-0.003020994	-0.033978824	0.046951222	0.150269345	0.176171214	0.286560255	0.09475776
11.8	0.009773291	-0.046344543	0.532734614	-0.004163841	-0.029896879	-0.03581424	0.216154035	-0.05274736	-0.112008953	0.447226567	0.40503448	0.447780574	-0.040408389	-0.380770408	0.558607988	0.422865085	0.104176947	0.058229073	-0.049467884	0.581522442	0.058367814	0.116798142	-0.026334496	0.173414883	0.03469752	0.097108558	-0.048374838	0.676769796	0.095280231	0.105297414	0.027113667	-0.033029374	-0.067000984	0.042649755	0.198799054	-0.234256282	0.187995561	-0.025794808
12	-0.043973189	0.049230188	0.485170112	0.028108093	-0.069475717	-0.015742997	0.102662148	0.041265766	0.046877308	0.456883353	0.450773606	0.3580637	-0.116026913	-0.145547828	0.275553668	0.427986744	0.11358141	0.083432225	-0.051713637	0.669213618	0.08289989	0.096050643	-0.023253484	0.163831318	0.013006021	0.057213819	-0.044032645	0.566555118	0.040555905	0.128697967	-0.019124919	-0.010294228	-0.033102517	0.04454209	0.289911036	-0.183126094	0.308356395	-0.134885053
12.2	-0.046843963	-0.018351491	0.480644612	0.006062118	-0.028720859	-0.053827344	0.230507388	0.051977627	-0.01301034	0.387718652	0.305260304	0.258113027	-0.010373196	0.110044966	-0.278022187	0.345030931	0.149870953	0.08428435	-0.058215634	0.68784544	0.121634479	0.044063197	0.008014354	0.078153273	0.055734924	0.067512937	0.215209715	0.780337357	0.163334238	0.18771652	0.038790208	-0.006318597	0.011592757	0.043690078	0.423784755	0.054514188	0.447752269	-0.116701903
12.4	-0.045133006	-0.159346166	0.519036237	0.036810603	-0.16305616	-0.089742477	0.128805963	-0.13289922	-0.033182475	0.325083687	0.257754913	0.258853315	0.060042856	-0.038229589	0.029153208	0.121971846	0.11092341	0.066922024	-0.055974202	0.563982689	0.056849567	0.018990092	-0.06549628	0.032503109	0.15067186	-0.019861217	0.034614237	0.491624277	0.175930862	0.036091852	-0.02679478	-0.036268743	0.009181066	0.020922008	0.3245941	0.094556525	0.31625243	-0.148340301
12.6	0.042531171	-0.048270808	0.541834849	-0.011744229	-0.222444733	0.07066338	0.174665566	0.059706722	-0.004058711	0.398916622	0.17176512	0.284457734	0.044322425	-0.065555771	0.643727777	0.482034255	0.10058589	0.047537142	-0.024346836	0.457350429	0.066156545	-0.02702906	-0.036732855	0.040302383	0.03160141	-0.072375823	0.221186742	0.537534289	0.241907155	0.048798153	0.015729736	-0.028266688	-0.00749269	0.056982556	0.177314836	0.225966624	0.158026404	0.086050192
12.8	0.162419839	-0.018804134	0.666857919	-0.006816922	-0.13310942	-0.128975892	0.096934408	0.088933855	-0.11542625	0.32897329	0.182245138	0.146040097	0.134305021	0.035858096	0.394669035	0.195620568	0.075667254	0.056014417	-0.124648121	0.658558791	0.029010573	-0.037404453	0.01001124	0.006948129	0.115114202	0.043768868	0.292997028	0.281788021	0.270028168	-0.081153929	-0.029453873	0.00479297	-0.064676024	0.036047516	-0.1665552	0.348964605	-0.005486162	0.01985948
