# Supplementary material for: Circuits for integrating learned and innate valences in the insect brain
Source: eLife journal article supplement (doi:10.7554/elife.62567), 2021-11-10
Supplement: supp [file elife-62567-supp-v1.zip › elife_poa_e62567_Figure_5_source_data_1.csv]

GCaMP responses to presentation of unpaired odour by MBON-m1 in animals trained with paired odour-aversive stimulation
Fluorescence values of the ROI over time for each presentation of CS+ and each individuals as plotted in Figure 5a.
normalised_time	indiv1_repeat_1	indiv1_repeat_2	indiv2_repeat_1	indiv2_repeat_2	indiv3_repeat_1	indiv3_repeat_2	indiv4_repeat_1	indiv4_repeat_2	indiv5_repeat_1	indiv5_repeat_2	indiv6_repeat_1	indiv6_repeat_2	indiv7_repeat_1	indiv7_repeat_2	indiv8_repeat_1	indiv8_repeat_2	indiv9_repeat_1	indiv9_repeat_2	indiv10_repeat_1	indiv10_repeat_2	indiv10_repeat_3	indiv10_repeat_4	indiv10_repeat_5	indiv10_repeat_6
0	NaN	NaN	NaN	NaN	NaN	NaN	NaN	NaN	NaN	NaN	NaN	NaN	NaN	NaN	NaN	NaN	NaN	NaN	NaN	NaN	NaN	NaN	NaN	NaN
0.2	-0.009525309	-0.031709748	0.031006477	-0.066848392	-0.180313905	-0.043649185	-0.256280885	-0.304954677	-0.058876257	-0.135522484	0.050385602	0.19382155	-0.168984642	-0.096364474	-0.091543724	-0.195597667	-0.106852061	0.169080334	-0.020883968	0.00117666	-0.036668548	0.092400001	0.03386213	-0.054915255
0.4	0.06975549	0.04955955	0.176258752	0.078129968	-0.210036258	0.009815864	-0.22342425	-0.315829921	-0.181379042	-0.398503108	-0.095620126	0.035056995	-0.244489821	-0.118855908	0.193192331	-0.111986125	0.09458018	0.095004964	-0.001147414	-0.044337765	0.004139166	0.110199797	0.06404298	-0.032471258
0.6	-0.043897655	-0.01171347	0.069960728	0.129485947	-0.127352147	-0.000845095	-0.075748917	-0.060524621	-0.146242622	-0.128071941	0.014208191	-0.059749534	-0.123446899	-0.119203784	0.117771491	-0.104162524	0.167969133	-0.052313332	0.021718535	-0.060470805	-0.000214174	0.113247851	0.052865286	-0.047731877
0.8	-0.066044112	-0.022900829	0.072830758	-0.032004321	-0.043110966	-0.020142676	-0.032933035	-0.180061672	-0.136590254	0.151445175	0.060178557	-0.263070524	-0.177256741	-0.086215262	0.22208132	-0.107410806	-0.184438784	-0.071633789	0.044705794	0.017307026	-0.053953616	0.105035861	-0.004896195	-0.068754306
1	-0.182746713	-0.121692153	-0.038821848	-0.043419792	-0.033078216	0.042637918	-0.096833128	-0.1618733	0.041261814	0.024614749	0.211995426	-0.293474259	-0.184032535	-0.050109037	0.056216019	0.000421509	-0.19960615	-0.168831487	0.021841347	-0.013702131	-0.079874449	0.0397947	0.028263412	-0.041058893
1.2	-0.112997897	-0.062738407	0.027041816	-0.040272806	0.093801256	0.007893709	-0.112007944	-0.181549222	0.065368816	-0.200235005	0.105703957	-0.163803589	-0.085990851	-0.181277894	-0.103402551	-0.051306821	0.009861817	-0.173130271	0.039247212	-0.027170194	-0.068669217	0.093609103	-0.047027075	-0.037126768
1.4	0.010573639	0.000624002	0.087923942	-0.114932053	0.02302611	-0.011927517	0.018728338	-0.290000363	-0.105702611	0.018663232	0.058086271	-0.111834461	-0.072668454	-0.221651112	-0.067557028	-0.036513648	-0.122286889	0.072868596	0.012995744	-0.029525783	-0.04406456	0.053237078	0.012928102	-0.035548076
1.6	0.014010631	-0.094513677	0.025277316	-0.146240496	-0.083874608	0.028655096	0.172305617	-0.234898791	-0.190451997	-0.14551779	0.034105472	-0.222707987	-0.152776941	-0.100830395	0.028412342	-0.075610226	-0.091467805	0.066681802	0.021282841	-0.013873234	-0.055865131	0.024460719	0.03497468	-0.026958227
1.8	-0.01105448	0.023422359	-0.061387423	-0.140878559	-0.135281433	0.001833791	0.156502878	-0.090094252	-0.179694844	-0.163992062	0.10832798	-0.151358065	-0.075892651	-0.280339626	0.062600274	-0.003504601	0.096857703	0.017799759	0.004860041	-0.01379767	-0.074284523	0.050379409	0.036052647	-0.005539858
2	-0.057507406	0.002570991	-0.111991847	-0.130639167	-0.040672798	0.01935894	0.096853562	0.03299769	0.069642354	-0.19068921	0.141836865	0.127539293	-0.01626566	-0.170530288	0.006939035	0.038011601	0.208335947	0.147957087	-0.040842358	-0.028216074	-0.051897653	0.082953484	0.069568125	0.01317585
2.2	-0.007222191	0.040645579	-0.138016128	-0.036343235	-0.087672359	-0.005074669	0.068459068	0.115193129	0.197970536	-0.189013775	0.224963028	0.108240863	-0.031100426	-0.155477696	-0.003204976	-0.011950926	0.010897332	0.220777179	0.046788518	0.025114131	0.030202977	-0.019036107	0.11731588	-0.012526639
2.4	0.127523684	0.023677626	-0.137111027	0.038021189	-0.031287849	-0.07582317	0.052552389	0.317712528	0.101685271	-0.01511843	0.072885824	0.022604631	-0.000601422	-0.082669907	-0.056382454	-0.033923779	0.030156137	0.445508987	-0.066291959	0.11668945	0.155563577	0.004809491	0.124841675	0.054163746
2.6	0.091676059	-0.010057906	-0.017697185	0.081720538	0.03407165	-0.057463011	0.030884264	0.386611741	0.113648598	-0.066368348	-0.104422133	-0.160155612	0.14921398	0.020335502	-0.153932778	-0.060184224	-0.061628999	-0.045291186	-0.044163085	0.10111484	0.065508525	-0.064168966	-0.10740521	0.040562309
2.8	0.030964542	-0.038919831	0.037175403	0.208637441	0.08720439	-0.078726452	-0.024325601	0.301656668	0.076388537	-0.137614816	-0.100282557	-0.220593985	0.356346237	0.012773138	-0.096866912	-0.091818672	-0.225935265	-0.077648154	-0.034113717	0.127069415	-0.039203618	-0.056192952	-0.182895343	0.052217171
3	0.005766472	-0.003771263	-0.004315362	0.210564684	0.10674497	-0.004423721	-0.010611379	0.266688971	0.098430628	-0.103858378	-0.063967248	-0.171468596	0.394711984	-0.014963948	0.005376145	-0.046527975	-0.351379527	0.2102578	-0.020853201	0.127756598	-0.057176465	-0.041853941	-0.088200571	0.055273153
3.2	-0.077861613	0.034898294	0.037385009	0.107148278	0.020440046	0.053148866	0.028170337	0.195727683	-0.023991324	-0.201812651	-0.162552138	-0.042656246	0.387255623	0.07935772	0.012234299	-0.003340868	-0.271423485	0.231573319	0.024250328	0.054717741	-0.008564505	-0.066344488	0.024624897	0.039498274
3.4	-0.056951306	0.015127141	0.019575266	0.012796871	0.095400123	0.003487697	0.039358282	0.243448855	-0.065928388	0.031771106	-0.195260824	0.146145185	0.295564652	0.143675707	-0.004611307	0.053310553	0.159477637	-0.44256538	0.06263675	-0.000419474	-0.029977812	-0.024142896	-0.015510144	0.086912273
3.6	0.042081707	-0.010909028	-0.059110756	-0.043263264	0.143267173	-0.021306078	0.071595557	0.322189766	-0.067755095	0.300788611	-0.150289505	0.184484325	0.205048224	0.169686216	-0.009601809	0.085566198	0.129267681	-0.2118692	0.019664496	0.015394547	0.017574242	-0.090979727	-0.008503409	-0.013829323
3.8	0.072837299	0.0729647	-0.077885368	-0.018603775	0.09227087	-0.003566153	0.079645299	0.22447892	-0.05737946	0.057524395	-0.112822308	0.147560154	0.106273068	0.196139739	-0.050105492	0.063308169	0.021836856	-0.187021286	0.018273665	-0.043668317	0.013252743	-0.100293907	-0.017087887	-0.023478369
4	0.078768669	0.061846477	-0.059398982	0.005393812	0.130536944	0.004270737	0.011549923	0.07374933	0.122718079	0.120434427	-0.036275599	0.163856832	0.016314442	0.192754064	-0.023026417	0.127949376	0.099318361	-0.131661508	0.026496197	-0.061891228	0.060628435	-0.094909776	-0.04102478	0.032710701
4.2	0.031595722	0.032498578	-0.015967437	0.00520324	0.13944466	0.019531509	0.02582798	0.007857784	0.186913383	0.40314007	-0.04753451	0.102388821	-0.067403617	0.248888807	0.009815784	0.219477554	0.161511216	-0.177158233	0.00820786	-0.040915319	0.087897797	-0.075514819	-0.032917593	0.042748366
4.4	0.008517732	0.08814415	0.023773145	0.014185896	0.084713335	0.056538911	0.111506393	-0.038171054	0.070372524	0.347504508	-0.107089104	0.076651312	-0.167665048	0.30528126	-0.024849686	0.219148733	0.110239978	-0.271986159	-0.037890569	-0.011948621	0.052546837	-0.064205863	0.007334603	-0.016693322
4.6	0.058173217	0.008446805	0.054755247	-0.033195687	0.034424765	0.060970301	0.048234446	-0.123408466	0.03234104	0.48458546	-0.058503994	0.192655623	-0.125995063	0.275516199	-0.021706124	0.160230211	0.151002034	-0.031301891	-0.062607914	-0.003536673	0.027029343	-0.108520179	0.002828207	-0.017800266
4.8	-0.000552153	-0.021288979	0.09172793	-0.087514591	0.017098154	0.045748926	-0.041475739	-0.146368051	-0.036871695	0.369685121	-0.084129517	0.181890998	-0.131668856	0.223636956	-0.059836669	0.0749239	0.135946294	0.23781501	8.60E-05	-0.128401036	0.115430308	-0.02296356	-0.046643477	0.082206029
5	-0.095799156	-0.062102749	0.102634483	-0.101815284	0.007733509	0.07446132	0.010719169	-0.092683154	-0.1123331	0.123380536	-0.075119292	0.122948104	-0.164198921	0.325718157	-0.061248364	0.094931802	-0.063223504	0.191270094	-0.019233342	-0.122639369	0.118069116	-0.044491169	-0.008638883	0.088597181
5.2	-0.112703414	-0.063586436	0.162231108	-0.100823924	0.059371134	0.215864807	0.108707424	0.013443704	0.221758901	0.605496955	0.182440475	0.190147777	-0.039946764	0.880294058	0.038362548	0.141760395	-0.07298155	0.06114775	-0.037714233	-0.100468444	0.150916942	0.042192073	-0.024191407	0.109904043
5.4	0.043633557	-0.107941493	0.423577037	-0.036335968	0.333830599	0.554403556	0.210833785	0.048373803	0.317116453	0.756789722	0.340759624	0.237940778	0.43211403	1.579865049	0.312654036	0.12489786	-0.043038805	-0.020754712	-0.04379047	-0.100449524	0.19929176	0.13990737	-0.010704992	0.121132786
5.6	0.101645792	-0.130620965	0.747356163	0.20016523	0.730874657	0.823381176	0.477221043	0.121012724	0.280164059	0.596954857	0.476035545	0.410066263	1.03059294	1.969205706	0.62088584	0.184738368	0.099502725	-0.019533883	-0.020009957	-0.137852562	0.256116823	0.209685001	0.058982818	0.112083803
5.8	0.217068294	-0.000942584	0.90009354	0.608463265	1.11624934	1.088455661	0.762783961	0.273870162	0.229238446	0.665807918	0.442291143	0.235496737	1.298415396	2.073831405	0.602201245	0.182073046	0.747905408	0.073438148	0.063079505	-0.20793169	0.357543935	0.364341824	0.088927185	0.119788025
6	0.375278921	0.089686964	0.847526698	0.752372855	1.388774715	1.161166563	0.875527036	0.651046343	0.290876753	1.032066509	0.51395883	0.46698216	1.497369197	2.2373868	0.680815304	0.135966024	1.304218313	0.983534804	0.095947749	-0.19251524	0.489039002	0.553561338	0.122887997	0.068716521
6.2	0.670396246	0.167060052	0.864175494	0.879778923	1.639779375	1.174144106	0.798856317	0.855107933	0.296911971	1.064863131	0.725773226	0.285654843	1.93691702	2.249954184	0.692948922	0.140120729	1.449678905	3.105773369	0.158211542	-0.07883729	0.536058361	0.455906924	0.127274591	0.108126061
6.4	0.745035002	0.19385918	1.172521326	0.770821197	1.858436399	1.21863538	0.995342964	1.034181686	0.254351796	1.053698232	0.762909031	0.374015417	2.297075039	2.374126127	0.560234876	0.036294751	1.908499055	4.210329939	0.20874333	0.082281587	0.574941096	0.398708887	0.115987974	0.147247937
6.6	0.706782354	0.265297451	1.116707931	0.599189645	2.09631033	1.356750699	1.0876773	1.162228082	0.389715729	0.737476153	0.654969909	0.420459286	2.540946625	2.424254779	0.587447026	0.081842394	2.549190898	5.454066387	0.227524971	0.209882112	0.66677	0.424325199	0.131725217	0.112556662
6.8	0.540430738	0.517024394	1.080482071	0.580911274	2.217678568	1.465892187	1.148878832	1.251645402	0.668301718	0.847092196	0.806288603	0.404296544	2.458241959	2.540573265	0.578903495	0.051285803	3.034799716	7.17433562	0.244797914	0.280134367	0.765259714	0.464060228	0.20583509	0.052224257
7	0.522379782	0.73843713	1.0214581	0.582953786	2.237288512	1.455030358	1.240699435	1.396523892	0.497504439	0.557962861	0.735684365	0.286399556	2.338301815	2.475214187	0.639616177	0.0422021	3.105867729	8.215510128	0.31165158	0.33889814	0.747507961	0.435036243	0.32562615	0.102887395
7.2	0.558116608	0.751515252	0.995700334	0.428906292	2.25921333	1.481737585	1.367216172	1.259289741	0.274134962	0.795401253	0.688649635	0.202756529	2.429797315	2.483106106	0.803523074	0.157314377	3.104461536	9.026595321	0.265860904	0.400578	0.759831973	0.566347164	0.3097905	0.104532271
7.4	0.60357584	0.641606348	1.120870966	0.183957606	2.22698482	1.411980243	1.299765028	1.353458211	0.242400561	0.50535019	0.597288473	0.16684775	2.299494463	2.455349338	0.670176621	0.203764524	3.029177719	9.092045427	0.319673685	0.363230604	0.771820869	0.556207835	0.295897758	0.160432882
7.6	0.59196365	0.793956287	1.123417206	0.150532049	2.172076926	1.355548019	1.417735841	1.170214642	0.345741204	0.13524856	0.501253544	0.197373838	2.393358235	2.252316852	0.425667544	0.199123099	3.099478897	9.448561365	0.31170078	0.347311802	0.851095988	0.564201578	0.242239336	0.179748205
7.8	0.675900891	0.766544942	1.212204664	0.120146134	2.279293792	1.320297411	1.357769203	1.127485476	0.073801807	0.210924736	0.386114056	0.226973232	2.379521333	2.132476131	0.482189904	0.100515366	3.006088693	9.910127734	0.31267382	0.337164774	0.84946688	0.604681319	0.235486816	0.168528654
8	0.643213978	0.687078592	1.057688903	-0.03146063	2.138671645	1.394602177	1.228418846	1.096906081	0.484992166	0.968149568	0.479407652	0.231246461	2.383516267	2.22621485	0.593963936	0.158474397	2.739020318	10.19913322	0.337557127	0.320695033	0.781586487	0.629339655	0.280395302	0.150240054
8.2	0.662575744	0.722515633	0.875793343	-0.060471762	1.920751901	1.551683854	1.369271363	1.479790948	0.272290796	0.764951939	0.498607267	0.159520701	2.335905626	2.417260521	0.486397757	0.063640234	2.634355231	10.1573915	0.325918833	0.31286314	0.822435348	0.577861123	0.287520507	0.143749568
8.4	0.707331696	0.6631741	0.863765135	-0.070305341	2.016520257	1.608945977	1.266043778	1.720278397	0.41726419	0.485130986	0.450235381	0.234345937	2.282542376	2.366797263	0.670923914	0.108840927	2.7635624	9.487360959	0.345774776	0.329743217	0.913350086	0.528576964	0.228175962	0.145358692
8.6	0.798664264	0.801315488	0.884808062	-0.022755769	2.059380954	1.47182319	1.240912927	1.728077909	0.483911086	0.599837517	0.357375221	0.456308477	2.347207339	2.254097911	0.781271376	-0.000943829	2.592870358	9.783565065	0.342867778	0.412953013	0.912575831	0.60572632	0.273261072	0.200639406
8.8	1.043335134	0.724728716	1.090738404	0.035826019	1.883351589	1.374470471	1.193809265	1.506359537	0.156589864	0.439805691	0.290419879	0.407831948	2.236466481	2.315804056	0.831125124	-0.000220333	3.036043756	10.2190232	0.36032687	0.446227489	0.957769323	0.682115283	0.229432324	0.232467107
9	1.008169753	0.712756539	1.169424905	0.050846011	2.107059119	1.376935641	1.307602833	1.649121904	0.24518433	0.48587904	0.293848876	0.258980922	2.216338321	2.212567836	0.524195358	0.07074036	3.211865648	9.793484103	0.359444523	0.444888762	0.965382583	0.723117455	0.265793447	0.236404558
9.2	1.019423313	0.896720301	1.154406683	0.152387016	1.963230302	1.134386565	1.319340235	1.730044206	0.234888303	0.128216413	0.33176193	0.135144052	2.255804667	2.147916998	0.463965955	0.076554061	3.061680638	9.270810936	0.345790792	0.410689654	0.930827826	0.709492909	0.347173132	0.236673921
9.4	1.153405812	0.853630152	1.152213454	0.184475946	2.17778745	1.102107265	1.341176808	1.804597255	0.374521094	0.007257546	0.335496456	0.295770094	2.195666239	2.317064448	0.351665814	0.134678416	3.27845096	10.11414	0.35415977	0.339744347	0.922735321	0.651315404	0.300075514	0.251232204
9.6	1.365720578	0.969972093	1.096535411	0.149117905	2.101289304	1.043077124	1.313788538	1.913969619	0.138291481	0.25203681	0.242217438	0.225312599	2.20851824	2.29595887	0.417338106	0.055024885	3.430918148	9.395572908	0.31412977	0.345464583	0.877982438	0.68327723	0.401682548	0.187306
9.8	1.280280107	1.042036686	1.040983239	0.138116061	2.160199353	0.963506858	1.281829578	2.067371259	0.313096633	0.331094088	0.16338775	0.359355138	2.15538082	2.234720151	0.372264047	-0.010012643	3.222665701	9.694853858	0.424288596	0.33262648	0.926708597	0.664323087	0.415141416	0.236160778
10	1.236875909	0.8996486	0.871266154	0.019005793	1.93387319	0.813320049	1.231570494	2.117344884	0.323441765	0.102560107	0.386819247	0.279809159	2.083298489	2.204230335	0.382244282	0.005392569	3.107383014	9.322069437	0.368309988	0.419162477	0.96571924	0.625766532	0.404990505	0.212844015
10.2	1.149441724	1.013306447	0.816105867	-0.064050672	1.769470962	0.712981423	1.243623981	2.048385412	0.19085492	-0.170907487	0.284178931	0.162997804	2.113774107	1.851356667	0.357276532	-0.049060853	3.098643432	9.11157574	0.351966564	0.445336687	0.9019609	0.622247157	0.357010261	0.201560566
10.4	0.995876573	1.085871827	0.854030953	-0.050349623	1.603243797	0.675773185	1.136279017	2.181700809	-0.049024447	-0.229166087	0.207802233	0.121409732	1.935067248	1.560686344	0.368099235	-0.008033858	3.23693846	9.524304303	0.399392509	0.422072406	0.831639982	0.699747193	0.318726151	0.213997404
10.6	0.835422635	1.125944197	0.811159714	-0.000340669	1.419886541	0.587220466	0.984942525	2.07426594	-0.236791182	-0.122124635	0.168453447	0.120037633	1.641891039	1.295564352	0.454924038	0.069014497	3.522072412	10.20505542	0.386479528	0.468500186	0.897621817	0.824591449	0.347692727	0.194255551
10.8	0.765733168	1.127895956	0.717721121	-0.013940468	1.185654582	0.460171936	0.846451858	1.797926065	-0.248841146	-0.226279636	0.210415103	0.153645418	1.329920728	0.989521145	0.414105075	0.187386749	3.542328587	9.710719441	0.393792944	0.468764046	0.817791905	0.676979974	0.318757764	0.154068601
11	0.68977896	0.878228325	0.611675095	0.037562039	0.981621462	0.296592022	0.740335972	1.538215348	-0.313916678	-0.432337655	0.22843186	0.122830945	0.989413256	0.734159914	0.276319103	0.194613449	3.12387113	9.087868248	0.326628343	0.43579265	0.815842518	0.655433742	0.337279029	0.236652607
11.2	0.488001902	0.743173249	0.495469231	0.046251236	0.836944576	0.096727608	0.566561238	1.391695351	-0.427016302	-0.291706413	0.18775407	-0.009908967	0.610771579	0.492847766	0.210923239	0.167237345	2.818462348	6.974016884	0.327762874	0.37362294	0.8655611	0.668198464	0.284973243	0.229316741
11.4	0.444466147	0.655878728	0.353095614	0.071181603	0.726568396	-0.032373632	0.344495803	1.189390932	-0.313647108	-0.238886224	0.004119823	0.022092542	0.373393013	0.26512047	0.207296615	0.1296469	2.531351835	5.348003746	0.310345471	0.343062796	0.905167483	0.641145212	0.270306508	0.191951608
11.6	0.46519409	0.584745992	0.266445306	0.07124653	0.738011005	-0.039229998	0.183479308	1.061895714	-0.251694152	-0.331883299	-0.124807081	0.117253855	0.260131598	0.160965995	0.137589599	0.092108887	2.175028965	4.85323635	0.269442055	0.356222706	0.867813097	0.595474989	0.297389618	0.154892059
11.8	0.36179146	0.608515288	0.262936764	-0.004611908	0.700176256	-0.071560802	0.14445811	0.941595094	-0.430952112	-0.302358931	-0.104625558	0.138647007	0.210067157	0.099610691	0.024604427	0.026013045	1.762876513	4.62846617	0.259043366	0.379763113	0.745607443	0.587867765	0.290990578	0.101478416
12	0.308181099	0.608370309	0.2119343	-0.025908691	0.49875525	-0.144943881	0.204706104	0.763953683	-0.577405331	-0.19072565	-0.145184488	0.090767552	0.216128208	-0.028805188	-0.024211151	0.007367596	1.492182833	2.862845891	0.277352567	0.362817494	0.727535324	0.557389822	0.217182893	-0.009997097
12.2	0.260117045	0.611514886	0.096024882	0.005338986	0.415495848	-0.207026756	0.177534097	0.697289159	-0.463191927	0.003275076	-0.198769662	-0.016590309	0.181359609	-0.094439521	-0.068655149	0.145599705	1.562548372	2.05744585	0.251732766	0.382844774	0.720376578	0.481910403	0.282204111	0.053034033
12.4	0.228639628	0.675686983	0.008847748	0.03495397	0.453988387	-0.261145824	0.128229769	0.616960895	-0.307916615	0.032351779	-0.235093737	-0.092787156	0.150648593	-0.118317263	-0.116241394	0.167007039	1.471850172	1.836055829	0.200466394	0.350787424	0.711176673	0.437420149	0.274054671	-0.002814454
12.6	0.268870914	0.789963256	-0.009007634	0.019911238	0.400964011	-0.239186818	0.212035842	0.600910096	-0.368475431	-0.210644022	-0.258711841	-0.139334352	0.117337078	-0.208549473	-0.094061341	0.038407887	1.070307318	1.703480225	0.181372862	0.324056552	0.698848022	0.443189604	0.22670902	0.016810582
12.8	0.247829487	0.793835112	-0.00598953	-0.022674895	0.357334887	-0.223428978	0.251969174	0.597371249	-0.357795819	-0.334924093	-0.180501424	-0.150577866	0.025744297	-0.217931793	-0.0650828	0.01578876	0.633690191	1.405202781	0.197676247	0.282399721	0.678223784	0.447902082	0.200758427	0.058575283
13	0.323824047	0.734326729	-0.043712818	-0.068283603	0.408305266	-0.253633348	0.301551002	0.504362965	-0.325462159	-0.2825751	-0.14460855	-0.240695737	-0.061710388	-0.188881962	-0.050300764	0.075713822	0.488648153	0.951650254	0.20476767	0.199909135	0.656637614	0.406855574	0.222870762	0.011060461
13.2	0.41939749	0.665177865	-0.057701693	-0.011214127	0.431357057	-0.290381563	0.386251673	0.389777275	-0.329203054	-0.394718022	-0.199672556	-0.153951714	-0.113411592	-0.189395522	-0.079519231	0.136773202	0.348765212	0.596402388	0.129235535	0.203800643	0.688014623	0.421892751	0.203310683	0.134840335
13.4	0.4815249	0.624552162	-0.106581594	0.113200929	0.325649805	-0.267261859	0.459256172	0.278160731	-0.35020663	-0.111880562	-0.171150918	-0.053556499	-0.072185363	-0.085105898	-0.012878088	0.116266314	0.262638243	0.808974117	0.140784752	0.150069113	0.58539648	0.336987107	0.25905691	0.133309658
13.6	0.510932046	0.533531527	-0.128350377	0.260748567	0.373208033	-0.264273766	0.456285328	0.226042984	-0.090041068	0.084710389	-0.212957785	-0.200406192	-0.055848907	-0.067430253	0.033253219	0.012321219	0.225542555	0.448897436	0.114491127	0.120863284	0.644839476	0.378528046	0.215340874	0.099076779
13.8	0.383747653	0.51536323	-0.083948147	0.340838088	0.434151666	-0.308922728	0.39870043	0.330516347	-0.140773185	-0.018643637	-0.254097686	-0.262443403	-0.110460883	-0.083824914	-0.111575463	-0.059779636	0.233652774	0.246821225	0.080192262	0.089118715	0.646688431	0.382137501	0.162035536	0.07678392
14	0.330620582	0.440261743	-0.036786527	0.345063365	0.362778602	-0.272760803	0.403432248	0.436931302	-0.110537118	0.209312011	-0.212367057	-0.132197482	-0.068210716	-0.133114381	-0.033170111	-0.110780123	0.226522267	0.366942769	0.05182828	0.064666515	0.530090054	0.355303508	0.150588504	0.036894566
14.2	0.423193016	0.465053834	0.120908052	0.500991	0.336397168	-0.238365012	0.441232055	0.425464123	0.03332375	-0.180613005	-0.386430333	-0.003972938	-0.105809117	-0.175892594	0.023081655	-0.129383427	0.11813662	0.578007334	0.036075184	0.054705159	0.364485338	0.348628663	0.15372828	-0.023601861
14.4	0.397888896	0.427230132	0.211435001	0.362106472	0.382888233	-0.317030189	0.485519206	0.166981619	-0.126693496	-0.169759213	-0.383390005	-0.115712964	-0.097970821	-0.303500799	0.118920628	-0.120407368	-0.162635009	0.64201595	0.055942821	-0.002185077	0.269250441	0.235730248	0.023812146	0.068597701
14.6	NaN	NaN	NaN	NaN	NaN	NaN	NaN	NaN	NaN	NaN	NaN	NaN	NaN	NaN	NaN	NaN	0.06541482	0.688717377	0.009531079	0.053789779	0.338743745	0.347822588	0.097413213	0.025914677
14.8	NaN	NaN	NaN	NaN	NaN	NaN	NaN	NaN	NaN	NaN	NaN	NaN	NaN	NaN	NaN	NaN	0.079049607	0.483972665	-0.024912277	-0.003532458	0.318007221	0.288006441	0.03578295	0.087953022
