# Supplementary material for: Circuits for integrating learned and innate valences in the insect brain
Source: eLife journal article supplement (doi:10.7554/elife.62567), 2021-11-10
Supplement: supp [file elife-62567-supp-v1.zip › elife_poa_e62567_Figure_5_source_data_2.csv]

GCaMP responses to presentation of paired odour by MBON-m1 in animals trained with paired odour-aversive stimulation
Fluorescence values of the ROI over time for each presentation of CS- and each individuals as plotted in Figure 5a.
normalised_time	indiv1_repeat_1	indiv1_repeat_2	indiv2_repeat_1	indiv2_repeat_2	indiv3_repeat_1	indiv3_repeat_2	indiv4_repeat_1	indiv4_repeat_2	indiv5_repeat_1	indiv5_repeat_2	indiv6_repeat_1	indiv6_repeat_2	indiv7_repeat_1	indiv7_repeat_2	indiv8_repeat_1	indiv8_repeat_2	indiv9_repeat_1	indiv9_repeat_2	indiv10_repeat_1	indiv10_repeat_2	indiv10_repeat_3	indiv10_repeat_4	indiv10_repeat_5	indiv10_repeat_6
0	NaN	NaN	NaN	NaN	NaN	NaN	NaN	NaN	NaN	NaN	NaN	NaN	NaN	NaN	NaN	NaN	NaN	NaN	NaN	NaN	NaN	NaN	NaN	NaN
0.2	0.001687089	0.073697147	-0.072490849	-0.007224327	0.070377053	-0.016236838	0.023627858	0.030770174	0.069502435	-0.134519303	0.252581497	-0.165339303	0.292070361	0.153057235	0.027639778	-0.112726405	-0.41354572	-0.078164312	0.005779238	-0.049074518	-0.026860238	-0.046354109	0.034407566	-0.013874239
0.4	-0.127596159	0.167017451	-0.064452999	-0.031673054	0.0265951	-0.029098979	0.031427471	0.024112068	-0.049857277	0.005105154	0.07668531	-0.085768281	0.164028908	0.176978332	-0.03303759	-0.02396456	-0.500827491	-0.097213008	-0.106987079	-0.069640893	-0.011460867	0.008065552	-0.002076921	0.024761495
0.6	-0.162961082	0.122127633	0.011710393	-0.082930309	0.023637974	0.003825621	0.01401651	-0.049913935	-0.091542423	0.157645993	-0.15123617	-0.229425393	0.166334943	0.070826186	0.087099821	-0.001113901	-0.519435794	-0.078648517	-0.178403615	-0.063000913	-0.0265873	-0.008684687	-0.029755468	0.04157187
0.8	-0.101160911	0.094973221	0.035990199	-0.211068377	0.104249626	0.055392342	0.054957217	-0.135438881	-0.181260794	0.76604314	0.004205839	-0.062713964	0.168176517	-0.022684366	-0.024709986	0.027884404	-0.379553976	0.01260806	-0.058527133	-0.044962117	-0.008845193	-0.095751865	-0.01259832	0.033513246
1	-0.009087897	0.245604212	0.180214699	-0.272091718	0.09378065	0.03660348	-0.032977781	-0.033632922	-0.022198121	0.260334306	0.14760816	0.103869922	0.207849344	-0.14349455	-0.067920755	-0.002785985	-0.700580111	0.124499834	-0.018483135	-0.005168443	0.049723676	-0.14499819	-0.00543171	0.035799544
1.2	-0.045235031	0.131225724	0.109118813	-0.273642135	0.040868044	-0.02858119	-0.033152072	0.293429891	0.130843781	0.143383678	0.1004828	0.215009201	0.09443195	-0.151483232	-0.032513106	-0.028096794	-0.236382404	0.289110502	-0.000101986	0.01259166	0.044461734	-0.071012885	0.033451821	0.030624666
1.4	-0.169706258	0.082289995	0.111675776	-0.235583371	0.024523716	-0.052401104	-0.060576343	0.26349023	-0.134396492	0.282018866	-0.022637073	0.174652418	0.026783971	-0.24489547	-0.073281501	0.006414245	-0.202884567	0.194245308	0.013383609	0.020282605	-0.079709246	0.018147313	0.051014931	0.052765819
1.6	-0.104017464	-0.005569191	0.083900298	-0.15726705	-0.032553467	-0.039879659	-0.107107735	0.125765331	0.016155964	-0.103625558	-0.141897627	0.073410081	0.035444533	-0.256265944	-0.093615005	-0.130308593	-0.21363473	0.159025091	0.009756752	0.024904561	-0.099446059	0.008704961	0.020480589	0.050949053
1.8	-0.121144677	-0.123174502	0.031381042	-0.090920168	-0.057292139	-0.046738175	-0.160746156	0.032307391	0.436106556	-0.221070582	-0.137515172	0.172164328	0.024129385	-0.117190902	-0.014001577	-0.096124437	-0.318680064	0.068568087	-4.90E-05	-0.002747627	-0.046768537	0.000654421	-0.025070961	0.048214788
2	-0.135097623	-0.211505589	-0.02283148	0.011250131	-0.017280277	0.002692015	-0.219522255	-0.077070849	0.108192557	-0.080656965	-0.138753772	0.213200845	0.000446009	-0.085970761	-0.011670848	-0.144335987	-0.450072387	-0.116846448	-0.014229904	-0.043700897	-0.000558597	0.063508801	-0.042768214	0.051916328
2.2	-0.080653867	-0.170768889	0.080803109	0.067356192	-0.013712051	0.01620252	-0.126424016	-0.130689011	-0.204999842	-0.067351851	-0.051572889	0.082428515	-0.025396374	-0.03931879	0.068275864	-0.105913363	-0.10526772	-0.046406917	-0.058114165	0.015411183	0.054810768	0.070944535	-0.019370516	0.000230131
2.4	-0.051288393	-0.109309092	0.105560673	0.245989198	-0.034946371	-0.043004245	-0.087154225	-0.07838947	-0.079821356	0.181823706	0.047320417	-0.131018424	-0.075442133	0.102971676	0.144900552	-0.069421452	-0.275353016	-0.225157963	-0.04217783	0.022697231	0.001257229	-0.002909246	-0.022688534	0.053682332
2.6	0.013667186	-0.03978395	-0.007448194	0.42259576	-0.007326157	-0.109451219	-0.041805597	-0.082066922	0.312694965	0.088311797	0.045530295	-0.213067373	-0.022238801	0.139800139	0.101530726	-0.044695758	-0.277172591	-0.188166488	0.043609286	0.017664025	0.073120209	-0.027030416	-0.047071707	0.030068441
2.8	0.094478231	-0.133551972	-0.119234812	0.389817139	-0.018499109	-0.055509727	-0.045345748	-0.067204289	0.286027724	-0.076133784	0.069323058	-0.134958112	-0.025415801	0.036520312	-0.01225758	-0.023931302	-0.202498814	-0.129341593	0.034441069	-0.003879894	0.080827958	0.023267524	-0.065781903	0.007396165
3	0.088172667	-0.203327385	-0.177422561	0.2282709	-0.048392778	-0.007611585	-0.14137779	-0.08459646	0.064591124	0.024436035	0.201567182	-0.061903974	-0.028133725	-0.01672638	-0.063762017	0.010357178	-0.088866495	-0.133528733	-0.005448711	-0.020228695	0.072367066	0.023056775	-0.065203832	-0.016258128
3.2	0.052681488	-0.078809734	-0.158301618	0.076053935	-0.101143988	0.034202729	-0.113903795	-0.054781973	-0.1487621	-0.032740673	0.324159348	-0.037317636	-0.008770757	-0.023101942	-0.135686459	0.081889297	0.099671872	-0.178061773	0.011920356	-0.015196851	0.073798502	-0.050732565	-0.033086742	-0.029999894
3.4	0.071118406	0.163810174	-0.134759367	0.023563485	-0.116780229	0.035841717	-0.014823118	-0.084604781	-0.240635542	-0.071241242	0.245947659	-0.018237154	-0.06818172	-0.06388482	-0.170511944	0.062228082	0.455130021	-0.136547137	0.0797927	0.008396166	-0.027148984	-0.005313666	0.037351253	0.024789613
3.6	0.067297431	0.216746784	-0.141084125	-0.039355194	-0.034897364	0.023302371	0.047630642	-0.068322666	-0.073664484	-0.114008685	0.132218434	-0.060191299	-0.12375293	-0.072896441	-0.12911518	0.040811106	0.604316767	0.101688322	0.100870729	0.12859707	0.009591181	0.03714343	-0.018103819	-0.005288612
3.8	0.114917567	0.17895556	-0.035300098	-0.121420515	-0.010487458	0.045574882	0.105037309	0.044381036	0.099285085	-0.051419327	0.007857785	-0.109587159	-0.132028703	-0.032741826	-0.107982239	0.161916237	0.47733161	0.153059461	0.057187926	0.049733735	0.004333777	0.033628516	0.066579495	-0.020449661
4	0.144608938	0.107919773	0.109656788	-0.137071166	-0.042592556	0.034437261	0.213965533	0.122682181	0.067856508	-0.125291446	-0.151676231	-0.049899847	-0.12362295	-0.056528516	-0.037019911	0.252092067	0.46199269	0.287032357	-0.018223581	0.019099347	-0.023373136	0.024231653	0.045748426	-0.061996566
4.2	0.114384672	-0.0124431	0.112996477	-0.096562609	-0.018766806	0.019983832	0.265696527	0.117601249	0.007035683	-0.384337765	-0.215977307	0.041601023	-0.147711865	-0.049774715	0.080201333	0.122084104	0.612186379	0.241229842	-0.006462313	0.012714194	-0.022494893	0.013202236	0.018038597	-0.085811974
4.4	0.137928146	-0.087563875	0.040296087	0.038230591	-0.017375055	0.014307623	0.182450433	0.052335883	-0.008714856	-0.335444631	-0.219007255	0.070515365	-0.208759931	0.106381355	0.148167295	-0.025823082	0.839093327	-0.005273381	0.068409995	-0.017843061	0.001131355	0.020781367	0.042451682	-0.063947376
4.6	0.119909762	-0.182955803	-0.030080842	0.169549243	0.006101286	0.021853985	0.110369487	-0.015075121	-0.113984802	-0.190129006	-0.250314179	0.062014777	-0.229456652	0.244864508	0.196345538	0.039082972	0.984362115	0.000942402	-0.004110395	-0.039821612	-0.031267213	0.087972144	0.001084451	-0.03151373
4.8	0.141116167	-0.16863745	-0.120413796	0.174686737	0.088830344	0.066480558	0.051728794	-0.080471033	-0.173418736	-0.088937579	-0.152234093	0.045634767	-0.230300826	0.230220744	0.118574806	0.120118541	0.686978385	-0.126097221	0.091713656	0.037967972	0.021102014	0.088444119	0.008421478	-0.088025044
5	0.239461026	-0.148607494	-0.218181635	0.146953076	0.153540874	0.051966815	0.010285373	-0.054425271	-0.040635982	-0.198376179	0.085774383	0.03789737	-0.167634036	0.175364155	0.012209232	0.096065001	1.035550457	-0.174496402	0.122778381	0.098493279	0.01004084	0.029172448	0.035082226	-0.039744162
5.2	0.272871274	-0.10397413	-0.165808745	0.199644709	0.352660247	0.160560585	0.069389861	0.022969103	0.062190759	-0.255473189	0.09399828	0.114107411	0.087136362	0.2172177	0.072339938	0.01433991	1.211762948	-0.28476163	0.244101249	0.119531183	0.034595803	0.019976497	0.026355382	-0.025892113
5.4	0.304866913	0.067783402	0.077621333	0.459906693	0.616523151	0.475987508	0.272535047	0.409387896	0.048629095	-0.238695488	0.324848677	0.269599795	0.465284896	0.289189809	-0.03943073	-0.143725412	1.785147546	-0.357707993	0.253165493	0.143738873	0.052470489	0.009808165	0.033625323	-0.058046715
5.6	0.426666308	0.343551959	0.309291524	0.680907119	0.840587706	0.79616901	0.506097631	0.881621318	0.161771965	-0.184867369	0.397200514	0.178594888	0.642227734	0.673059071	0.02413666	-0.239896963	2.908602824	-0.097756973	0.186316068	0.164896945	0.056221835	-0.016442786	0.0850222	-0.087844886
5.8	0.402120344	0.485102129	0.596076941	0.833668401	0.929066506	1.092256541	0.657538057	1.162572317	0.302581722	0.099587068	0.571591183	0.081345835	0.884661892	0.917487452	0.223784691	-0.360845936	3.893672415	0.819033576	0.405785768	0.112953833	0.099308833	0.004569362	0.137498142	-0.055008353
6	0.436493516	0.504001262	0.780680071	0.837903347	0.980115052	1.293587699	0.715971092	1.522515072	0.223438016	-0.00275751	0.433911423	0.098909066	1.116433058	1.15684431	0.337974214	-0.308802594	5.010502242	1.636243759	0.582528861	0.067303298	-0.012202871	-0.013290181	0.06528018	-0.089799605
6.2	0.498689566	0.533322779	0.963704828	0.909491395	1.073383225	1.459172155	0.789623939	1.585305041	0.191355317	0.128086576	0.378749341	0.027902992	1.217665034	1.306862706	0.434180231	-0.274535108	4.97432099	2.095166828	0.561945697	0.128528955	-0.057972654	0.031338716	0.096824642	-0.063702801
6.4	0.47581082	0.745008275	0.992973362	0.954138561	1.130303104	1.456993814	0.81842965	1.606151802	0.327197798	-0.044543389	0.264740332	0.031471133	1.413522496	1.375360953	0.562840766	-0.234864584	5.163156791	2.374812123	0.463146601	0.11872247	-0.070009414	0.063261751	0.184586803	-0.011183864
6.6	0.584951261	0.711232209	0.983217079	1.024615943	1.15221838	1.359107238	0.882352994	1.716009256	0.412623436	0.172879717	0.375132351	0.074191958	1.424109367	1.362885961	0.593438758	-0.165956816	5.591997122	2.542016927	0.529292511	0.119881727	-0.056491007	0.114545172	0.245191426	0.022226808
6.8	0.581864981	0.759118895	0.999906773	1.140010432	1.270318359	1.461911888	0.780522715	1.879301476	0.443037065	0.867742152	0.391547001	0.026963676	1.667859454	1.349816698	0.619251506	-0.101095836	5.900779313	2.70695889	0.693734447	0.14376289	-0.030226987	0.161771471	0.259502223	0.026163535
7	0.596571295	0.558062821	1.125274507	1.131373447	1.237969764	1.486057037	0.817295502	1.868825076	0.733534291	0.543599906	0.343498637	0.18797826	1.691414388	1.449122919	0.585712363	-0.146584894	5.840376239	2.963960874	0.607516297	0.094093574	-0.015883114	0.1092924	0.281003812	0.028855505
7.2	0.613142287	0.742019737	1.184196252	1.068535719	1.192999547	1.490860945	0.828432445	1.924979321	0.485307497	0.770012244	0.556233439	0.174887112	1.682910173	1.500996799	0.558920069	-0.259295	6.657659708	2.821903437	0.572179571	0.10101272	-0.066428451	-0.06262334	0.286441327	0.02228505
7.4	0.627286466	0.644239848	1.121424031	1.015602724	1.198267808	1.500963738	0.850260684	1.940290801	0.475224443	0.807949691	0.78557923	0.251011792	1.572284299	1.24042825	0.62586577	-0.249709933	6.704389777	2.98927625	0.672774631	0.061174292	0.038951051	-0.023368729	0.23890941	0.042750837
7.6	0.572495569	0.566287782	1.095016932	0.999176032	1.266149121	1.469550135	0.923067795	1.745887671	0.09752	0.966635593	0.757848169	0.268177563	1.518048691	1.168283973	0.676237355	-0.103217276	6.336251128	3.027502146	0.752261138	0.130996152	-0.005103531	0.011102345	0.242999243	0.063332365
7.8	0.682121582	0.698844797	1.11297598	0.994900461	1.392404227	1.378444222	0.801485928	1.916948219	0.280835901	0.451699399	0.937490756	0.251727461	1.306504431	1.338711661	0.595143683	-0.251599237	5.878732445	2.936785792	0.784850911	0.118752553	-0.061955622	0.005472809	0.293661398	0.108824976
8	0.668172656	0.687261288	1.071708167	0.921654937	1.275324215	1.26446881	0.840367236	2.066475378	0.284631112	0.704001402	0.938995431	0.362279384	1.385906995	1.448121407	0.629892156	-0.327819819	5.671971005	2.916558102	0.75093433	0.035264187	-0.057012586	0.002520944	0.326746769	0.141080372
8.2	0.646970937	0.802660305	0.972671496	0.950649813	1.370795415	1.099550936	0.797642981	1.876466457	0.049121581	0.73935458	0.915820458	0.284808847	1.2469461	1.308598117	0.553446863	-0.09662092	5.918941453	3.180127644	0.644958754	0.088245276	-0.041438318	0.063175051	0.279779751	0.08567626
8.4	0.668017874	0.99918761	0.848262215	0.919751525	1.350509335	1.148686415	0.829063011	1.892334723	0.140556309	1.050321162	1.065373999	0.238044524	1.173646889	1.637670048	0.656561481	-0.082057014	6.111983757	3.359684151	0.630465968	0.089008602	0.046646688	0.079991135	0.317108747	0.063582803
8.6	0.66132227	0.991999874	0.886561836	0.934205398	1.434781733	1.105889425	0.745405332	1.928698282	0.09124891	0.498467313	1.279758033	0.084516705	1.149985543	1.410392656	0.631244045	-0.128875203	5.367463383	3.074759232	0.879779098	0.061640777	-0.020503445	0.089424184	0.29757706	0.068879197
8.8	0.637177324	0.892557908	0.895622433	0.897004931	1.28554913	1.291530644	0.804719991	1.787669169	-0.204236361	0.580914276	1.154779852	0.026476335	1.101506076	1.537065507	0.384531602	-0.097445861	5.408566633	2.802460709	1.122167048	0.018643714	0.00109973	0.031169454	0.273200965	0.053631093
9	0.664934132	0.931909785	0.941153635	0.919119552	1.378358933	1.237202919	0.751258387	1.665381518	0.351994468	-0.188485003	1.173219492	0.110561014	1.117497792	1.698693469	0.446041125	-0.111721827	6.051927772	2.764757936	1.17997665	0.004214307	0.035363087	0.001447679	0.272017968	0.067638251
9.2	0.624275362	1.021095299	0.936799044	0.918613966	1.213259106	1.158732414	0.828458349	1.620038871	0.404147325	-0.056826511	1.220943727	0.464054399	0.99720698	1.724580853	0.351819589	-0.093574763	6.565143367	2.800338714	1.05451867	0.00914286	0.050163632	0.033152183	0.268840163	0.102279133
9.4	0.660317539	1.068652967	0.910419326	0.907811913	1.172780581	1.219663172	0.864280553	1.704021889	0.461711927	0.443835343	1.16388235	0.85130849	1.137459925	1.740356558	0.459791618	-0.003404058	6.336606726	2.625805291	0.924439104	0.002254791	0.074965108	0.064024072	0.22439087	0.097988738
9.6	0.718777399	1.143504995	0.880444989	0.855494388	1.080155212	1.13494841	0.810956263	1.762220639	0.494968121	0.702658469	1.050989617	0.860988642	1.099353684	1.725755931	0.433376117	0.009402624	6.374792993	2.89482669	1.10299116	0.107237685	0.035297976	-0.049001562	0.249728352	0.060851765
9.8	0.720504743	1.287353109	0.886329383	0.776349431	1.000087158	1.009657586	0.80480472	1.861933866	0.184956433	0.250940547	1.057391608	0.642681052	1.041385943	1.723675885	0.339135306	-0.040898369	6.5412496	3.078312243	1.086528549	0.089734871	-0.018599987	-0.014616243	0.279117072	0.033336592
10	0.670319398	1.224688414	0.877764617	0.797578107	0.955853351	0.95263445	0.721849355	1.774919429	0.163242134	0.322899605	1.162846299	0.571720044	0.891947311	1.600896799	0.257802827	-0.1762869	6.610718728	3.002574787	1.169448015	0.093913345	-0.003106754	0.029437691	0.297674099	0.021567351
10.2	0.60031941	1.129573756	0.857038444	0.851151339	0.757560493	0.884625171	0.603573554	1.596368114	-0.044711696	0.159896338	1.12529852	0.457064972	0.764686746	1.48327759	0.266274239	-0.193707122	6.591654375	2.804437131	1.182535338	0.131355947	0.044572857	0.035135178	0.304153716	0.042295452
10.4	0.544964865	1.032087136	0.78620133	0.781548347	0.570057422	0.670986676	0.6041305	1.565711568	-0.132251734	0.139895483	0.766456753	0.202185009	0.585742294	1.347403256	0.292932222	-0.159064995	6.145084024	2.742264678	1.200936623	0.172909742	0.058434806	-0.002792153	0.289632102	0.074849523
10.6	0.437311667	0.843227486	0.690043394	0.553832621	0.467683856	0.422377381	0.580340539	1.487729352	-0.000730903	0.160336927	0.792450482	0.184170275	0.409632229	1.105850328	0.272854435	-0.177120307	4.973141424	2.94454798	1.3876127	0.188911651	-0.000603739	-0.054869591	0.25394587	0.074219803
10.8	0.360803552	0.796988193	0.548669044	0.293675817	0.320649982	0.276358907	0.545315913	1.165275982	0.063591249	0.073505442	0.940107785	0.062526436	0.283091024	0.818301387	0.300661159	-0.042429847	4.115140282	2.775539537	1.281403563	0.23182149	-0.027069309	-0.06408727	0.263154885	0.016793046
11	0.243286724	0.583980535	0.332232556	0.09367677	0.181741425	0.213094985	0.42401916	0.974045373	0.026292313	-0.119669996	0.600723467	-0.147755446	0.223825737	0.563001528	0.240909499	-0.085321175	4.021400626	2.205872833	1.103867218	0.210175336	0.054346387	-0.033009124	0.294935471	0.03096371
11.2	0.115896256	0.383854779	0.114660633	-0.002465491	0.057166763	0.127495913	0.215238191	0.777140364	0.028504371	0.14809231	0.491991988	-0.239994107	0.070644604	0.407234288	0.127152282	-0.181702381	3.403285331	1.760376505	1.037314161	0.197799499	0.081146791	-0.002983993	0.233310688	0.065982952
11.4	0.063489314	0.340781793	-0.073507328	-0.027810823	-0.064728364	0.071191653	0.034613929	0.466167107	-0.080647053	0.443129967	0.576100184	-0.273397622	-0.068606218	0.329555576	0.07219447	-0.156194319	2.656368054	1.310528159	1.099843256	0.169950607	0.051906673	0.019699792	0.200807836	0.059346003
11.6	0.086405607	0.293654481	-0.216206557	-0.031038507	-0.128880486	0.048252498	-0.051076966	0.286726229	-0.200099594	0.538564619	0.515115525	-0.282110511	-0.081179174	0.274953601	0.114786023	-0.116778218	2.215406775	0.97731376	1.231032453	0.150066424	0.026515154	0.025084683	0.206041967	0.040432403
11.8	0.132087079	0.268368162	-0.255753974	-0.020353072	-0.166372445	-0.024062847	-0.115906327	0.213714295	-0.126562628	0.405904929	0.458021235	-0.279266565	-0.047512916	0.292216212	0.086170647	-0.118888602	2.162467499	0.897631976	1.289708041	0.178584571	0.06397321	0.0107028	0.181849731	0.060594692
12	0.070750227	0.213597223	-0.265261931	-0.024479148	-0.191982926	-0.114788287	-0.168533543	0.076503225	0.015727216	0.263939658	0.295984105	-0.361291053	-0.048442887	0.364292103	0.021310385	-0.161595687	1.690500552	0.501281857	0.997651124	0.215843378	0.108521266	0.014769924	0.145294862	0.010395518
12.2	-0.019155074	0.078110093	-0.321182977	-0.081778874	-0.163828179	-0.166200556	-0.14690658	-0.008801223	0.072289892	0.279814288	0.157084854	-0.413784819	-0.028728558	0.361854051	0.044126654	-0.191870768	1.316511312	0.392196219	1.030480796	0.081237242	0.071525253	0.040737559	0.173412543	-0.019785743
12.4	-0.051558814	0.061565504	-0.379258403	-0.154993458	-0.177357723	-0.165358587	-0.145086546	0.045348329	0.098522448	0.238099311	0.178525827	-0.28361012	0.039594078	0.340957914	0.005187331	-0.282908837	0.922568812	0.548019998	1.230797454	0.084000201	-0.016783369	0.01358412	0.197184261	-0.062851391
12.6	-0.136053877	0.237759123	-0.40651694	-0.225637796	-0.254318577	-0.114390367	-0.152856289	0.113907862	0.092545879	0.477475759	0.16378963	-0.255972793	0.047760441	0.389639967	-0.045989241	-0.432269317	0.71016257	0.641417369	1.260101686	0.075819885	-0.017138563	-0.05775885	0.121161209	-0.086977406
12.8	-0.17932537	0.283722435	-0.396409022	-0.304090819	-0.281159277	-0.087933886	-0.152837273	0.093597894	-0.007924126	0.535636495	0.097407413	-0.356995258	0.066870166	0.35725927	-0.050419902	-0.443276655	0.678471004	0.623258151	1.234926954	0.047458233	0.025978465	-0.085276269	0.031509754	-0.063518451
13	-0.142600566	0.158807889	-0.428249413	-0.33096496	-0.335724978	-0.153253142	-0.270378521	-0.117594002	0.068358325	0.382388904	0.059890629	-0.285803622	0.023488954	0.242338209	-0.002841207	-0.376720367	0.617902295	0.563288347	1.423695582	0.058558622	0.015745662	-0.010534555	0.038367077	-0.02128413
13.2	-0.13741096	0.097200213	-0.506302215	-0.354281883	-0.366715711	-0.199160647	-0.368028997	-0.141766838	0.064176782	0.243798744	0.100631835	-0.321838851	-0.04614423	0.188819582	0.107349874	-0.376431715	0.133030642	0.278028095	1.633787591	0.041149486	0.074061539	0.002981587	-0.029899817	-0.143677948
13.4	-0.240155529	-0.031323125	-0.530734279	-0.311096	-0.344317395	-0.184103201	-0.454209058	-0.035066367	-0.005357093	0.066125718	-0.015627894	-0.421289645	-0.018858414	0.173432011	0.171590699	-0.375965541	0.280333039	0.022456127	1.373550385	-0.026285504	0.034129748	-0.052423813	-0.035214796	-0.152097695
13.6	-0.230057938	0.002162745	-0.526890638	-0.27172798	-0.383358429	-0.15355016	-0.515585621	-0.10954238	0.308194883	0.021734244	-0.039072964	-0.328525663	-0.129811495	0.216917813	0.041879456	-0.454070447	0.032651672	-0.077383264	1.268576075	0.009325936	-0.006960007	-0.058921968	0.017792897	-0.151533781
13.8	-0.20810642	-0.029927129	-0.550452343	-0.323420759	-0.416134467	-0.069774993	-0.47798735	-0.180236749	0.211751617	-0.00738072	-0.083264405	-0.376301712	-0.15984837	0.294917303	0.027790178	-0.441171831	0.043734567	0.002510359	1.270351051	0.050750916	-0.039085938	-0.037389103	0.004044207	-0.155022001
14	-0.16848051	NaN	-0.527832477	-0.275962951	-0.424904442	-0.109940618	-0.479322354	-0.140868396	0.400433713	-0.134559719	0.039978155	-0.409645502	-0.255632271	0.323407869	-0.014929983	-0.40957782	0.317110618	0.081682695	1.296244703	0.063140336	-0.053654717	-0.046291544	-0.05804911	-0.147620835
14.2	-0.221111183	NaN	-0.502007349	-0.215043338	-0.371469918	-0.153656231	-0.360230645	-0.221031785	0.374762222	0.217248794	0.191318456	-0.231084756	-0.226126154	0.213426701	0.070574273	-0.405774148	0.50919064	-0.045173832	1.302188963	0.050877637	-0.043373837	-0.103294246	-0.0881725	-0.124720214
14.4	-0.288898909	NaN	-0.519281165	-0.137448657	-0.359857033	-0.109045782	-0.285942622	-0.376965557	0.122811035	0.146732837	0.176576969	-0.323309255	-0.244203239	0.079267111	0.099683341	-0.416396683	0.492220155	-0.357794983	1.3486477	0.003629766	-0.005448159	-0.078627599	-0.075014412	-0.144483107
14.6	NaN	NaN	NaN	NaN	NaN	NaN	NaN	NaN	NaN	NaN	NaN	NaN	NaN	NaN	NaN	NaN	0.137242787	-0.298418808	1.132296231	0.064158319	-0.046555043	-0.148737854	-0.160086695	-0.151406986
14.8	NaN	NaN	NaN	NaN	NaN	NaN	NaN	NaN	NaN	NaN	NaN	NaN	NaN	NaN	NaN	NaN	0.193759705	-0.37944495	1.182280164	0.028741374	0.018808092	-0.136325921	-0.170976556	-0.113675708
