# Supplementary material for: Circuits for integrating learned and innate valences in the insect brain
Source: eLife journal article supplement (doi:10.7554/elife.62567), 2021-11-10
Supplement: supp [file elife-62567-supp-v1.zip › elife_poa_e62567_Figure_5_source_data_3.csv]

Value angles showing turn responses of animals during optogenetic silencing of MBON-m1
Mean and std values of the turn angles over time in the different experimental groups shown in Figure 5b.
time interval (s)	stim_ON	emptySplit_GtACR2_mean	emptySplit_GtACR2_std	MBONm1_GtACR2_mean	MBONm1_GtACR2_std	CN33_GtACR2_mean	CN33_GtACR2_std
20	0	1.048260766	0.572430325	17.41658131	18.41664459	1.011970917	0.52268658
20.5	0	1.0396907	0.559712856	17.0075515	17.78237109	1.008648	0.522307095
21	0	1.036857225	0.557784374	17.11137257	17.88204608	1.010922388	0.53106181
21.5	0	1.038836697	0.555967389	16.992272	18.61834163	1.0188815	0.522894451
22	0	1.008942416	0.564136543	16.78241614	16.99266328	1.047891498	0.526892911
22.5	0	1.028934966	0.559563049	16.17769637	17.05089657	1.004917224	0.512687847
23	0	1.036562312	0.567059198	16.2079723	17.42723619	1.021938547	0.521939907
23.5	0	1.04981893	0.557036728	16.4619761	16.58710637	0.99667858	0.535189389
24	0	1.027959468	0.554645874	17.47982247	17.58828362	0.980073575	0.516525351
24.5	0	1.029791026	0.560340028	17.84200344	17.58784418	0.99813646	0.501187197
25	0	1.0341685	0.559874931	17.07551466	16.18806896	0.980248421	0.516399638
25.5	0	1.018028169	0.545513126	16.98624198	17.35073003	0.978736201	0.526598082
26	0	1.026029674	0.557881907	17.28939078	17.11639453	0.968252792	0.51608881
26.5	0	1.020456351	0.565614478	16.70748591	15.9690725	1.018278491	0.508593309
27	0	1.04363	0.569079136	16.13258452	17.04034114	0.990457171	0.520971059
27.5	0	1.02482258	0.562976533	16.20750523	16.25800207	1.026926571	0.523523541
28	0	1.018276241	0.56438231	16.97537555	18.13659181	0.999996191	0.531093059
28.5	0	1.027760796	0.562035307	16.77125269	17.87142456	1.006675043	0.521335922
29	0	1.032806441	0.554492538	18.13509377	18.80348636	1.010667889	0.499613882
29.5	0	1.030038256	0.560669681	17.1990894	17.49105368	1.004204257	0.514207775
30	0	1.01322399	0.572658654	17.98211414	18.99367624	1.01334934	0.524113469
30.5	1	1.025416294	0.562533392	16.79651548	18.22210138	1.028979839	0.535930691
31	1	0.8699195	0.500048451	16.29129589	16.49486272	0.814360245	0.453699391
31.5	1	0.7183265	0.437805567	20.89655868	19.29994737	0.633721127	0.385698132
32	1	0.757954297	0.445717069	33.97966986	24.0464691	0.719116981	0.388573028
32.5	1	0.797981565	0.450624659	41.06870033	27.64049322	0.735149283	0.410178021
33	1	0.850962503	0.484925666	39.11080088	27.83890321	0.780856579	0.419556901
33.5	1	0.887626349	0.501143108	34.57608974	26.87545875	0.806425154	0.436475023
34	1	0.919761228	0.504558613	30.78204731	25.74580468	0.838363077	0.434623754
34.5	1	0.922352348	0.503014798	29.51809518	26.89471929	0.840326853	0.462211948
35	1	0.907772275	0.515852461	29.77692811	28.2144664	0.844541684	0.450677362
35.5	1	0.920575701	0.51966424	29.75326149	29.43540747	0.863251036	0.451925493
36	1	0.921727833	0.506456958	30.28025519	30.09108023	0.837987182	0.453617466
36.5	1	0.941123091	0.512495143	30.76713367	28.81105994	0.862896707	0.450097816
37	1	0.937106917	0.514881767	30.56669268	29.25541191	0.876246746	0.436808432
37.5	1	0.954865608	0.520719335	33.37010325	31.23290309	0.870089523	0.452584408
38	1	0.946414578	0.521411813	32.22724011	31.16009788	0.842064375	0.432883183
38.5	1	0.954296439	0.516228759	31.29539716	29.54145602	0.864075151	0.445191624
39	1	0.9377385	0.518957932	31.89207091	30.67128833	0.894490092	0.467765077
39.5	1	0.95414547	0.51238271	32.76130886	31.12043059	0.919714882	0.466528904
40	1	0.952267186	0.528726863	31.08562904	30.32020615	0.897584523	0.474737329
40.5	1	0.962448358	0.528978626	30.99149114	30.97589275	0.907130465	0.473422529
41	1	0.97103112	0.544779677	29.90212513	30.18519682	0.905101328	0.453860998
41.5	1	0.958040933	0.540546842	29.60886219	29.46473446	0.912806808	0.459679117
42	1	0.962417401	0.535205358	30.88698237	31.23771512	0.920025172	0.452532796
42.5	1	0.952933776	0.515737109	30.26222474	29.58540239	0.923737606	0.469378423
43	1	0.95331194	0.523483761	31.25431613	32.59050288	0.91073623	0.459008797
43.5	1	0.976995064	0.531962602	30.29261623	30.6321617	0.901696747	0.459255599
44	1	0.963062964	0.517744582	30.35747871	30.34847692	0.928756663	0.468392152
44.5	1	0.976389547	0.522796896	29.49661967	28.55765811	0.934116925	0.487660533
45	1	0.978229917	0.540371029	29.01853964	28.86442979	0.938545254	0.469243604
45.5	0	0.976842262	0.53743211	28.23939251	28.70485906	0.939974833	0.488558924
46	0	0.981699364	0.523900789	28.28053892	29.42688432	0.963764525	0.477709044
46.5	0	1.029611414	0.55356427	28.40287885	28.97370567	0.995634599	0.502364838
47	0	1.065289561	0.574948375	25.4817353	27.04171572	1.036105707	0.531133076
47.5	0	1.086053118	0.581915783	22.01782273	25.50923031	1.07787986	0.516074002
48	0	1.097298205	0.574739231	19.52262565	21.56155488	1.098846967	0.513817615
48.5	0	1.1030469	0.568706013	18.48172738	20.86616983	1.099115081	0.546048331
49	0	1.098603303	0.588021739	17.68704223	21.15021983	1.108519635	0.52172992
49.5	0	1.103410063	0.59078521	17.48420859	19.83147241	1.128314923	0.51903646
50	0	1.104427525	0.578318682	16.2718846	17.49156243	1.112050168	0.522168699
50.5	0	1.126745289	0.571176673	16.35386759	17.90099912	1.095613932	0.531614728
51	0	1.108115262	0.579242317	17.18416488	20.71309819	1.073093046	0.513147495
51.5	0	1.112192535	0.591317648	17.66103397	21.10135583	1.092836716	0.511046884
52	0	1.107975621	0.577707976	17.31571952	19.29662989	1.086796786	0.521299736
52.5	0	1.115130421	0.573247419	17.53570682	19.88152865	1.095506877	0.519953657
53	0	1.112712399	0.590804596	16.88722085	18.38323986	1.077339761	0.52643296
53.5	0	1.102002548	0.563718966	16.66800688	17.78812711	1.091799144	0.510724319
54	0	1.097407185	0.555571462	15.9246898	16.57424168	1.093649595	0.523034112
54.5	0	1.092673173	0.57063232	17.04569244	19.05504313	1.09269365	0.506791714
55	0	1.109918234	0.568066644	16.36459807	18.98034827	1.087628509	0.526674485
