# Supplementary material for: Circuits for integrating learned and innate valences in the insect brain
Source: eLife journal article supplement (doi:10.7554/elife.62567), 2021-11-10
Supplement: supp [file elife-62567-supp-v1.zip › elife_poa_e62567_Figure_6_source_data_1.csv]

Individual GCaMP fluorescence values in response to odour presentation by CN-33 of animals with intact olfactory pathway
Fluorescence values of the ROI over time for each repeats and each individuals as plotted in Figure 6b (left).
normalised_time	indiv1_repeat_1	indiv1_repeat_2	indiv2_repeat_1	indiv2_repeat_2	indiv3_repeat_1	indiv3_repeat_2	indiv4_repeat_1	indiv4_repeat_2	indiv5_repeat_1	indiv5_repeat_2	indiv6_repeat_1	indiv6_repeat_2	indiv7_repeat_1	indiv7_repeat_2	indiv8_repeat_1	indiv8_repeat_2
0	-0.048481544	0.083979482	0.047204267	-0.025054082	0.317658396	0.33092482	0.080452251	-0.026650735	-0.217097352	0.274874825	0.226501936	-0.111506334	0.065601596	0.132432678	0.160806387	-0.268368387
0.2	-0.119716288	0.021291473	0.03177889	0.049994809	0.020930157	0.008720947	0.590151047	0.011685268	0.095714506	-0.089509749	0.124507866	0.030950052	0.006799739	0.071500396	0.308359517	-0.102827962
0.4	-0.102612171	0.06289976	0.19327302	-0.016690135	0.431188537	0.247941964	0.309508624	0.23606779	0.154520432	0.039314974	-0.069678666	0.049696508	0.089893123	0.147536723	0.26715822	0.254146357
0.6	-0.046898807	0.04742329	0.190428319	-0.006130478	0.338276586	0.240334953	0.27821107	0.200630079	-0.245880812	-0.091992991	-0.223057243	0.01326416	0.066669952	0.088117621	0.104627786	-0.265764008
0.8	-0.020227884	-0.062983314	0.146559301	-0.001400648	0.204912288	0.086512382	0.05819377	-0.001716335	-0.070100689	0.077975704	-0.046460677	-0.013027926	0.019593974	0.087333005	0.014675696	0.039698552
1	0.013306099	0.111623061	0.022725728	-0.045853496	0.312682346	-0.014299923	0.069529861	-0.044512919	-0.189414041	-0.317187699	-0.2462067	-0.140529786	0.043395422	0.096313912	0.202328294	0.213201542
1.2	0.037525144	0.087560197	-0.024785938	-0.050999349	-0.014875376	-0.021901139	-0.005765067	0.106831395	0.316570913	0.159641878	-0.106050713	-0.077268507	-0.033484838	0.083217171	0.134231314	0.324668418
1.4	-0.017907153	-0.048413872	-0.107637485	-0.072495083	0.28441351	0.300863208	-0.025487345	0.006275111	-0.156226896	-0.22951447	0.072778982	-0.099593248	-0.063081413	0.032961288	0.285208994	0.19133949
1.6	0.044625849	-0.092274055	-0.07970901	-0.041737013	0.389249012	0.62249407	-0.075380269	0.085911654	-0.320522656	-0.216491068	-0.22416732	-0.001696647	-0.106413299	0.043759406	0.040596114	0.22018094
1.8	0.020988534	0.104577785	-0.081659222	0.013366138	0.110433732	0.407486162	-0.194085665	0.226287725	0.018957626	-0.112200308	0.043434998	0.060669937	-0.185153156	-0.024197174	-0.07672299	0.516571072
2	-0.012281689	0.056997498	-0.011274691	-0.014597633	-0.038348746	0.241785293	-0.115483933	0.256925894	-0.201676292	0.204607064	0.256178238	0.216953569	-0.064618821	-0.024862552	-0.27353627	-0.005870269
2.2	0.028916423	-0.128274405	0.096658852	0.023552109	-0.305111448	0.298818295	-0.024299471	0.265647156	0.11138684	-0.258690964	0.280744728	-0.118673555	-0.090294559	0.029906083	-0.151309515	-0.012975469
2.4	0.071988109	-0.066320626	-0.033517895	-0.07349004	-0.106339066	0.047894416	0.012157618	-0.004458508	-0.372787027	-0.41304715	-0.057582985	0.056825507	0.035948838	-0.04045461	0.000613499	0.116164865
2.6	-0.020793568	-0.080639311	-0.061824418	0.048593253	0.023612631	0.025840728	0.027603181	0.014948592	0.114614445	-0.354140093	0.059401775	-0.108447567	-0.01591716	-0.073350052	0.112770411	0.080607488
2.8	0.070376459	-0.071334692	-0.130382761	0.023608579	-0.25465343	-0.093451998	-0.229595336	-0.100930761	-0.424561597	0.700119652	-0.11929776	0.232479236	-0.001743667	0.003319566	-0.041799047	0.141650807
3	-0.061628245	-0.043547387	-0.103499005	0.126806226	-0.389005573	0.016634237	-0.103266352	-0.211764797	0.052256968	0.478524227	-0.121807567	-0.169940595	0.056763668	0.047857651	0.022361908	-0.115931966
3.2	-0.080990382	0.022700523	-0.107962323	0.100545212	-0.252568143	-0.148207323	-0.163929046	-0.24043578	0.240160516	-0.172619268	-0.093038871	-0.137883205	0.096002361	-0.056085466	-0.116845937	0.022441293
3.4	0.107955414	-0.051087518	-0.094453611	0.020035673	-0.365747805	-0.238890198	-0.151184882	-0.108473147	0.438953585	0.192528693	-0.119659998	0.221245052	0.043944604	-0.033610392	0.022876188	0.200627231
3.6	-0.103968066	-0.044902057	-0.006742386	-0.051765301	-0.180217675	-0.399139044	-0.161113509	-0.111549482	0.130309942	-0.018003572	-0.151681744	0.096385039	0.004759833	-0.041421334	-0.102957886	-0.167278692
3.8	0.082802116	-0.012560754	-0.009056596	-0.051959774	-0.282054042	-0.566108073	-0.118744324	-0.061912459	-0.019742695	-0.043704679	-0.09760549	-0.061004003	-0.004895583	-0.067676117	0.006711482	-0.072145876
4	0.116527762	0.040038076	0.001830813	-0.037191963	-0.414939416	-0.385153579	0.021499484	-0.160403638	0.230369712	0.193624792	-0.000384609	0.236157453	0.070217465	-0.036338383	-0.164630538	0.022021977
4.2	0.002897016	-0.048575802	0.073493777	0.048868216	-0.128435809	-0.398074413	0.013577739	-0.281811806	-0.486850334	0.188976215	0.295047431	-0.16942254	0.046853815	-0.094462587	0.022513099	-0.153486927
4.4	-0.053717522	-0.045579548	0.14737991	-0.081740073	0.120368349	-0.214710536	-0.121577304	-0.100727787	-0.288407371	-0.378471276	0.016794974	-0.052070116	0.076969432	-0.10572297	-0.340384602	-0.108808184
4.6	-0.023712029	-0.019832962	-0.077994059	0.083722772	-0.023953481	-0.183016093	-0.082236025	0.085803057	-0.016625313	0.129375204	0.039845549	0.030732296	0.037092547	-0.159411213	-0.293818554	-0.166153008
4.8	0.106309216	-0.015017037	0.059026598	0.079267401	-0.072109523	-0.274668926	-0.140689554	-0.088377393	0.051623219	-0.049209642	0.108801626	-0.089788082	-0.026357298	-0.215832886	0.003345611	-0.256460982
5	-0.02727486	0.000534495	-0.020347456	0.146766536	0.037717673	-0.323168694	-0.252467187	-0.153501847	-0.312607713	0.010052237	0.351886239	-0.005073756	0.00058342	-0.165249807	0.239253302	-0.130782682
5.2	0.000879501	0.00058727	0.001927738	0.082833271	-0.006964066	-0.319003178	-0.112820574	-0.063030604	-0.220294648	-0.186800753	0.057484381	0.150702689	-0.019702742	-0.129738046	-0.177912442	0.02709654
5.4	0.001140786	-0.044520801	0.033930772	0.208677537	0.070263149	-0.025260131	-0.025788974	0.184461247	-0.42896722	0.139432376	0.14227528	-0.119137369	0.038901806	-0.116076214	-0.059172852	-0.065946115
5.6	0.060061313	0.048507078	0.036703432	0.276124784	-0.134759129	-0.196848872	0.003993415	0.383528431	-0.417022646	-0.267833091	0.180603233	-0.010868989	0.11416764	-0.059657103	-0.027763021	-0.289473713
5.8	0.091695907	0.06035311	0.157443957	0.216198664	-0.270078204	-0.406522141	-0.137429603	0.138865065	-0.176796214	-0.402273605	0.150903825	0.291533181	0.199273008	0.09978611	-0.100815611	-0.151320198
6	0.051527082	0.035928198	0.119227164	0.200911822	-0.292606632	-0.587658119	-0.073957407	0.393224574	-0.318480104	-0.188817462	0.021998842	0.030045798	0.18888313	0.181707615	0.016198053	-0.065395755
6.2	0.013880031	0.124028769	0.091945066	0.249817389	-0.366055598	-0.715698753	0.167082273	0.583885074	-0.484662505	-0.008273903	0.092358079	0.188331053	0.322748392	0.220060097	-0.209859253	-0.383419313
6.4	0.072077831	0.100464192	0.147480713	0.152270173	-0.211328483	-0.584946198	-0.018281307	0.580939423	-0.439280513	-0.258501461	-0.131804368	-0.107047195	0.398464924	0.324406873	-0.118575613	-0.088100969
6.6	0.027497876	0.194894443	0.195268525	0.13181081	-0.412321959	-0.59114538	-0.138580987	0.306933966	-0.163126476	-0.537955558	0.064719358	-0.172107448	0.46816754	0.435722638	0.01070135	0.07605388
6.8	0.004533695	0.213766793	0.210478381	0.181517781	-0.404989353	-0.553337404	-0.316382325	0.16707166	-0.365689193	-0.363787599	0.302743114	0.066668787	0.406161805	0.509870588	-0.365930178	-0.284930469
7	0.020275777	0.323603416	0.132147124	0.132778928	-0.594034872	-0.613626727	-0.247076498	-0.010529091	-0.259927462	0.101290984	0.113971516	-0.091654745	0.350511973	0.590499284	-0.169666299	-0.128527506
7.2	0.046837476	0.011244048	0.216165593	0.110947547	-0.387184177	-0.643305515	-0.157705239	-0.115587556	-0.610789248	-0.403415853	0.730624452	-0.126545751	0.349633869	0.582246285	-0.038167748	-0.228732398
7.4	0.051535347	0.276525319	0.140455064	0.175000792	-0.322548619	-0.591741833	0.100849725	-0.037503221	-0.755952661	-0.183873616	0.4658638	-0.159225118	0.362773546	0.418946738	0.033711991	-0.057270399
7.6	-0.005643801	0.215192522	0.149512138	0.109098942	-0.363574898	-0.559428979	-0.09165898	0.104833796	-0.663711579	0.332083053	-0.046427141	-0.414111903	0.340099437	0.417862811	-0.167254234	-0.165370784
7.8	-0.0392905	0.109212548	0.224630428	0.042468309	-0.51332038	-0.629639825	0.05346829	0.049348609	-0.486023656	-0.144517492	0.21647033	-0.115399396	0.35013292	0.379360452	-0.029610434	-0.137853241
8	0.029070278	0.171674707	0.287943441	0.079494588	-0.476429783	-0.590789301	0.144701023	-0.248879845	-0.517139611	-0.034156236	0.144283214	-0.205783599	0.452666465	0.371251097	-0.037450503	-0.058699356
8.2	0.143911273	0.18345507	0.276404842	0.019980528	-0.464272455	-0.614002648	0.136492917	0.295640749	-0.467864272	-0.384646636	-0.132939407	-0.038612358	0.505292628	0.425510919	-0.211973496	-0.167286919
8.4	0.035922386	0.02310473	0.274813646	0.015739369	-0.565223563	-0.676641801	-0.077990934	0.02288242	-0.431540575	0.403751552	-0.016313029	-0.141097355	0.474084631	0.41474445	-0.3459856	-0.10410065
8.6	-0.027544255	0.08349823	0.148859459	0.011957563	-0.434395737	-0.709536013	-0.003074007	-0.091461532	-0.155683132	-0.194217661	-0.046790527	-0.088884997	0.406384958	0.469269021	-0.136624386	-0.28302314
8.8	-0.093528718	0.223344701	0.141197088	-0.004487503	-0.202986201	-0.596092632	-0.046443189	0.437929634	-0.628853202	0.147236286	-0.053715943	-0.002744466	0.361525907	0.400348416	-0.395462391	-0.355063269
9	-0.028493398	-0.008721661	0.134007417	-0.088245933	-0.119981547	-0.366621264	0.199728911	0.090291262	-0.419808485	0.548441438	-0.170528937	-0.10669185	0.436903993	0.458681284	-0.128297113	-0.344802495
9.2	-0.023768153	0.092170814	0.151270774	0.011775757	0.170371115	0.027707004	0.289584973	0.198551179	-0.32024544	-0.176453867	-0.080942149	0.088380646	0.445844063	0.454513635	-0.415297453	-0.190664776
9.4	-0.024940276	-0.001023947	0.191486067	-0.109320585	0.358746381	0.331945838	0.131443314	0.200058187	-0.160740267	0.111826582	-0.12046984	0.205752518	0.352432461	0.4819691	0.088333402	0.046534264
9.6	-0.020642661	-0.081898346	0.336290593	-0.053853502	0.926737055	0.326969688	-0.033709073	-0.183324968	-0.253804636	-0.277269193	0.112554535	-0.073094089	0.295895426	0.517567991	-0.228723982	-0.047595193
9.8	-0.060598304	-0.085713078	0.183031332	-0.079036502	1.204182757	0.321998718	0.779641016	-0.167582674	-0.406159162	-0.430371502	0.329439023	0.042986661	0.433241991	0.532537289	0.132270114	-0.016354338
10	0.006846113	0.002652281	0.05739257	0.041133196	0.945592355	0.124864163	0.486273826	0.283132808	-0.074469941	0.117030458	0.929095004	-0.054421824	0.328060917	0.461362011	0.206011321	0.019452992
10.2	0.039056879	-0.229336657	0.12120404	-0.008211975	0.631163523	0.268704273	0.400307138	0.235851964	-0.39557296	-0.451820066	0.902528222	-0.098283838	0.283203818	0.364626186	-0.071324643	0.404191952
10.4	-0.04618756	-0.072483491	0.111852331	-0.004454814	0.723464212	0.663858536	0.235286012	0.274864024	-0.205122868	0.206544214	0.578589745	-0.144566551	0.253774787	0.388462335	-0.008125875	0.085779191
10.6	-0.02386701	-0.020344776	0.197142638	-0.023310716	0.820529945	0.590243927	0.20623522	0.392784852	-0.156109983	0.131579367	0.155690076	-0.062139994	0.287747044	0.35521855	0.201576899	-0.054369017
10.8	0.041388976	-0.168215648	0.225844309	-0.074930534	0.666112208	0.391550973	0.078229394	0.382091791	-0.107734945	0.162162564	0.792213279	-0.014225757	0.245607907	0.342255432	-0.007798419	0.191582558
11	0.032433696	-0.053385403	0.088210999	-0.065397157	1.171000718	0.632225929	0.261267948	0.446783241	-0.292721784	-0.500868287	1.347180967	-0.038828647	0.266746784	0.273746147	0.031687699	0.436439666
11.2	0.123484306	-0.077759502	0.102266958	-0.170720398	1.26940373	0.747660255	0.054493644	0.21983308	0.032675087	-0.05706908	1.093302298	0.034114325	0.278111445	0.235468011	-0.212267246	0.071382131
11.4	0.021512705	-0.183898878	0.078965827	-0.142362051	1.366671747	0.539247073	0.160757239	0.268852519	-0.156780741	0.533663605	0.825369008	-0.06554573	0.262716053	0.189480311	0.022865324	0.176704058
11.6	-0.037195546	-0.31029996	0.049298064	-0.168231523	1.862280722	0.518519736	0.233174654	0.356691499	0.354397143	-0.679708426	0.615233803	-0.15721135	0.217096126	0.222631018	-0.276883463	0.323909952
11.8	-0.08720359	-0.046301622	0.186591824	-0.192085093	1.569926175	0.39647359	0.079099224	0.264473778	0.299469978	0.263040722	0.217135131	0.040795275	0.231045307	0.29992249	-0.088083349	0.137592243
12	-0.068814634	-0.174119031	0.22422143	-0.059340552	1.325717546	0.284265027	0.162685241	0.12141657	0.251499859	-0.137251087	0.161594055	-0.133259263	0.203282468	0.242108119	-0.147586969	0.173095193
12.2	0.021492382	-0.085108908	0.255232428	-0.201518614	0.921681324	0.63660752	0.058503251	-0.123672409	-0.238994815	-0.206400723	0.847769784	-0.096418417	0.280648441	0.163066848	0.031357304	0.244727424
12.4	-0.043589144	0.162162427	0.20374193	-0.167649325	1.209375997	0.660413349	-0.147454681	0.066723512	0.017455706	-0.2678772	0.414797616	-0.110123861	0.130464214	0.202624377	0.045081149	0.146034733
12.6	-0.107245219	-0.093540704	0.177225781	-0.176262055	0.747194472	0.843393053	-0.170277708	-0.206172976	-0.055789986	-0.137120053	0.172036429	-0.050357128	0.174263168	0.218505934	-0.031291017	0.030417077
12.8	-0.017434893	-0.087320946	0.16901971	-0.20044182	0.597239303	0.945503872	-0.333879598	-0.073563068	-0.320749224	-0.108826825	0.062440716	-0.108716105	0.20485709	0.173811073	0.046731503	-0.009364731
