# Supplementary material for: Circuits for integrating learned and innate valences in the insect brain
Source: eLife journal article supplement (doi:10.7554/elife.62567), 2021-11-10
Supplement: supp [file elife-62567-supp-v1.zip › elife_poa_e62567_Figure_6_source_data_2.csv]

Individual GCaMP fluorescence values in response to odour presentation by CN-33 of animals with silenced mushroom body
Fluorescence values of the ROI over time for each repeats and each individuals as plotted in Figure 6b (right).
normalised_time	indiv1_repeat_1	indiv1_repeat_2	indiv1_repeat_3	indiv1_repeat_4	indiv2_repeat_1	indiv2_repeat_2	indiv2_repeat_3	indiv2_repeat_4	indiv3_repeat_1	indiv3_repeat_2	indiv3_repeat_3	indiv3_repeat_4	indiv4_repeat_1	indiv4_repeat_2	indiv4_repeat_3	indiv4_repeat_4	indiv5_repeat_1	indiv5_repeat_2	indiv6_repeat_1	indiv6_repeat_2	indiv6_repeat_3	indiv6_repeat_4
0	NaN	NaN	NaN	NaN	NaN	NaN	NaN	NaN	NaN	NaN	NaN	NaN	NaN	NaN	NaN	NaN	NaN	NaN	NaN	NaN	NaN	NaN
0.2	0.032452934	0.064135873	-0.094306251	NaN	0.023413082	0.044794777	0.256105926	0.099950425	0.021752911	0.148853647	-0.19832743	-0.019056213	0.192074875	-0.029446669	-0.070332887	-0.091711321	-0.148125205	0.052842552	-0.063773497	-0.003266317	-0.108783895	-0.11202592
0.4	0.200157303	-0.009084223	-0.110387277	NaN	0.091756724	0.077342197	0.095926854	0.077143212	0.006052486	0.132273571	-0.124843017	0.10706235	0.245812064	-0.015112344	-0.084548378	-0.131225239	-0.075070384	0.030567004	-0.032299513	0.021368201	-0.205092349	-0.071028221
0.6	0.18442071	-0.153477672	-0.068445431	NaN	-0.016226517	0.03919173	0.079107231	-0.01292373	0.054563125	0.110111511	-0.153042667	0.078565674	0.122099884	-0.150248968	0.059133758	-0.245914686	0.003123659	-0.096966481	-0.080311572	-0.033261479	-0.185181721	-0.053378146
0.8	0.144545541	-0.007208617	-0.052613339	0.084244178	-0.141290419	0.055356651	0.1028058	-0.046310518	0.034392713	0.108761375	-0.004990321	0.029979051	-0.044192896	-0.151463073	-0.045378849	-0.263206543	-0.045967398	-0.089769193	-0.085932413	-0.10599358	-0.234033535	-0.055610861
1	0.205278196	0.077758159	-0.07424895	0.044177731	-0.105563863	0.031540333	0.172751595	-0.166144953	0.080148805	0.157603973	0.021492992	-0.00271733	-0.245971444	-0.179875479	-0.054041878	-0.34301042	-0.111581162	-0.137763355	-0.115499064	0.008714146	-0.236522493	-0.049251372
1.2	0.209841381	-0.029520142	-0.054667591	-0.018083059	-0.139648449	-0.011813009	0.227497212	-0.135062001	0.025365376	0.192246313	-0.019707062	0.136214823	-0.40594104	-0.152730877	0.023618786	-0.356481503	-0.082088973	-0.024583727	0.054651685	-0.035441974	-0.188291581	-0.004320317
1.4	0.196053231	0.018043631	0.062388789	-0.107392367	-0.132822179	0.103819234	0.120109734	-0.089056006	-0.028660471	0.034380205	-0.056117876	0.067945278	-0.357578546	-0.159927804	0.075191792	-0.336989537	-0.161894589	0.036760389	0.229668356	-0.040725687	-0.142709361	-0.115071407
1.6	0.074708674	0.088266235	0.025728939	-0.137722248	-0.145710134	0.056929192	-0.032845733	-0.133226171	-0.064347928	-0.031731941	0.067624187	0.05164083	-0.313859498	-0.175121197	0.109237317	-0.164199322	-0.178033678	-0.108101255	0.13733572	-0.125381653	-0.147686434	-0.098854158
1.8	-0.029529024	0.013287562	0.010127282	-0.105865647	-0.027668648	-0.076519583	-0.031937223	-0.180133764	-0.007679125	-0.082966692	-0.083249143	0.000608026	-0.232604648	-0.026162694	0.0566392	0.041856185	-0.150081697	-0.021064865	0.095524083	-0.028585311	-0.094755588	-0.133098969
2	0.019777569	0.057649761	-0.012269705	-0.068207162	0.036972394	-0.091180199	-0.036633785	-0.127010568	0.037953681	-0.043052729	-0.110762606	-0.043728843	-0.190258691	0.106401504	0.201960852	0.077467046	0.007765013	-0.048742813	0.08012009	-0.128801794	-0.036085371	-0.14781279
2.2	-0.002962656	0.046336111	-0.05144193	0.009417917	0.013937147	0.002548937	0.065498059	-0.097348189	0.033670206	-0.088109851	-0.132456623	-0.088296815	-0.177107569	0.075174363	0.193868169	0.173370125	-0.001208517	-0.071477843	0.004145777	-0.073885391	0.01407934	-0.169197228
2.4	0.069232045	-0.023527181	-0.036525132	0.102414844	-0.052538291	0.067884261	0.014541189	-0.065324416	0.116868339	-0.10637693	-0.063660573	-0.005969315	-0.185749552	-0.024125784	0.103091404	0.338039785	0.033745667	-0.085019532	-0.03235894	-0.063052094	0.097073435	-0.149992301
2.6	0.14781056	0.038994972	0.055850897	0.115534586	-0.013089421	0.039758328	0.023195859	-0.013529888	0.121071318	-0.076542515	0.010222645	0.041340987	-0.15402439	-0.075878888	0.161691298	0.281502313	0.085611535	0.068528055	-0.054316906	-0.066267267	0.175827571	-0.105452183
2.8	0.134914648	0.040004601	0.066358299	0.127544609	0.091168651	0.051808594	0.043749305	0.063645632	0.015910995	-0.093555391	-0.013804732	-0.028734541	-0.070480329	0.070880722	0.175026889	0.174410713	0.09791297	0.200106344	-0.071165662	0.010390573	0.139084503	-0.003360894
3	0.088573024	-0.013002183	0.020547247	0.182555402	0.081916239	-0.054689892	0.015122	0.16074893	-0.04205137	-0.097157802	-0.040536349	-0.009459159	0.034144187	0.125849154	0.019458674	0.200962814	0.041185357	0.295089527	-0.046012049	0.033471351	0.087737209	0.011151592
3.2	-0.031559247	0.024878487	-0.063777658	0.192303398	0.007165182	-0.141058723	0.052720207	0.069659201	0.052476623	-0.036159341	-0.045923601	-0.018650754	0.184906363	0.106564767	-0.046617949	0.166768309	0.083402444	0.277531623	-0.02411582	-0.001532228	0.093237555	-0.033100341
3.4	-0.052032551	-0.011943936	-0.065757436	0.081809488	0.02497067	-0.102035269	0.043530191	-0.041306388	-0.014951663	-0.018848584	-0.051163988	-0.081285974	0.226787155	0.10054144	-0.033121661	0.136605512	0.092828362	0.245808025	-0.077891839	0.043088934	0.037012054	0.038579508
3.6	0.045220314	-0.045877058	0.005157979	-0.047440097	0.141395246	-0.083894785	-0.060500751	0.004517266	-0.114135126	-0.023493803	-0.001166588	-0.045994091	0.192337438	0.060186057	-0.072006795	0.149343091	0.047110059	0.26351358	-0.089268902	0.039411596	0.043865471	0.129657485
3.8	0.059183737	-0.064791707	0.065844677	-0.082524945	0.128447306	-0.127404868	-0.109136218	0.102681221	-0.075285056	0.005655734	0.031471601	0.046815943	0.204758324	0.041527185	-0.101888737	0.104641991	-0.017310075	0.151923638	-0.001141219	-0.032925586	0.137932115	0.141180564
4	0.055312305	-0.080343109	NaN	-0.072795504	0.017095475	-0.098835684	-0.115805313	0.136352501	-0.053958927	0.011317384	0.074903617	0.021862839	0.251283337	0.1010115	-0.120568121	0.053722347	-0.102247636	-0.032091327	0.156858514	0.029827124	0.160747048	0.180932732
4.2	-0.004116183	-0.006914118	NaN	-0.053014596	0.005703997	-0.035627023	-0.133275459	0.112034468	-0.027023285	-0.02771019	0.141565883	-0.054231442	0.261258413	0.124087215	-0.139433004	0.014224134	-0.159747104	-0.141872962	0.148217445	0.177889961	0.123918632	0.235273309
4.4	-0.247498238	-0.002565203	NaN	-0.075933497	0.042893048	0.036433815	-0.163400506	0.121069753	-0.018679902	-0.089979197	0.169611613	-0.050125661	0.214455438	-0.012843037	-0.129404337	-0.053795407	-0.110722741	-0.153646558	-0.00561672	0.205133565	0.073921103	0.206772916
4.6	-0.728838539	-0.046460941	NaN	-0.116256064	0.015248436	0.141879312	-0.224190792	0.128298966	-0.03080641	-0.072499587	0.176135173	-0.032998437	0.152991479	-0.076211246	-0.101296584	-0.048518259	0.201057749	-0.17011106	-0.058376537	0.145919133	0.096918335	0.161853132
4.8	NaN	-0.002916525	NaN	-0.069547321	-0.005963036	0.078190402	-0.240015817	0.054784659	-0.042694745	0.005788615	0.193608316	-0.041279711	0.072273041	0.128622161	-0.092676789	0.057355024	0.426305927	-0.265123425	-0.083831904	0.064732126	0.18021278	0.133778012
5	NaN	-0.002005903	NaN	NaN	0.124601316	-0.019182739	-0.196032505	-0.003131213	-0.098841185	-0.029550627	0.338562051	-0.068865673	0.021158905	0.269960241	-0.120000709	0.121424994	0.198242559	-0.273748417	-0.006999821	-0.065290332	0.142058889	0.048059998
5.2	NaN	-0.037730373	NaN	NaN	0.223403658	0.017398834	-0.123336114	0.066427711	-0.016398629	-0.083433015	0.368222712	-0.026673458	0.00029271	0.193844755	-0.097555747	0.2079185	0.019624518	-0.202043264	-0.00582214	-0.127816602	0.145714966	-0.042242297
5.4	NaN	0.026449485	NaN	0.058711045	0.313501907	0.105093919	-0.090183415	0.123660666	0.001783737	-0.094271936	0.297093842	-0.0445911	0.045973644	0.098258117	-0.088915706	0.352221048	0.293093968	0.063856887	0.273820495	-0.218510033	0.390267954	-0.039820249
5.6	NaN	-0.044493483	NaN	0.097148396	0.359961214	0.131352388	-0.058740053	0.119869802	-0.147431566	0.045715339	0.210581203	-0.097078521	0.056872972	-0.0177141	0.066219937	0.456585528	0.664669245	0.300308652	0.708723401	-0.048802833	0.663165198	0.053187476
5.8	NaN	0.054918008	NaN	-0.014548543	0.305570768	0.104752295	0.0612585	0.074346599	-0.137097694	0.032966904	0.194598656	-0.110246409	0.109812	0.044673769	0.257290042	0.310791004	0.904735195	0.432351423	0.8467184	0.30536714	0.842216439	0.217573417
6	NaN	0.165628198	NaN	0.075948821	0.305184832	0.176436505	0.059655413	0.071540366	-0.101947042	0.062758982	0.24847946	-0.095250204	0.03883345	0.134240286	0.100869747	0.238063255	1.320958823	0.449111153	1.062077147	0.472850691	1.005403829	0.347433303
6.2	NaN	0.204813202	NaN	0.14684217	0.358841111	0.31100261	0.028642183	0.10228824	-0.029658619	0.075420656	0.236322053	-0.14111839	-0.147029484	0.189950948	0.036792523	0.167414939	1.311570881	0.545961342	1.351616609	0.709121127	1.215323377	0.465578519
6.4	NaN	0.201511431	NaN	0.167742156	0.374403415	0.506798593	0.026949532	0.244687796	-0.048755358	0.109288592	0.234640997	-0.118611298	-0.197755228	0.154278957	0.156077374	0.132475357	1.143074977	0.610195279	1.515812593	1.173542432	1.411364991	0.574834921
6.6	NaN	0.209538739	NaN	0.1500643	0.301533348	0.521814486	0.166034038	0.180087161	-0.036122831	0.094517294	0.266577787	-0.094386909	-0.175224694	0.008004241	0.177637178	0.209652546	1.128820684	0.491738595	1.541882371	1.212088601	1.57531064	0.55013619
6.8	NaN	0.250295856	NaN	0.144455928	0.212390005	0.506583391	0.193356443	0.037709078	0.077358401	0.21694523	0.307349065	-0.05828963	-0.134915244	-0.08746487	0.103290631	0.26569236	0.956327973	0.25307039	1.69693912	1.561859954	1.768309406	0.710398818
7	NaN	0.20849643	NaN	0.153124073	0.387843453	0.390936284	0.21684945	-0.080097819	0.126599768	0.271430829	0.34769683	-0.01954564	-0.165537308	-0.095977682	0.089813566	0.134449978	0.880661639	0.340623159	1.744652586	1.874530406	1.781230758	0.789597055
7.2	NaN	0.317551129	NaN	0.196304034	0.52464238	0.280644661	0.187313166	-0.087631873	0.136238114	0.297407893	0.291007289	-0.093428805	-0.225780652	-0.14251861	0.374963068	0.161507966	0.677100399	0.230247682	1.672960106	2.202517525	1.656850724	0.975408325
7.4	NaN	0.466840218	NaN	0.105907748	0.499742511	0.424299605	0.122101382	-0.077632704	0.042576368	0.27982215	0.337985156	-0.186377287	-0.145833304	0.00540152	0.398054242	0.2343748	0.625056127	0.130347666	1.518136075	2.137593048	1.660947447	0.920646736
7.6	NaN	0.404045295	NaN	0.122501857	0.429708486	0.391425856	0.18572532	-0.155074748	0.167854333	0.441637328	0.243348093	-0.080265459	-0.154794182	-0.164882274	0.421434245	0.290061555	0.302112291	0.116789237	1.529808591	1.981976179	1.706518678	0.891468411
7.8	NaN	0.267592621	NaN	-0.039625706	0.486510112	0.374561125	0.087431221	-0.260366402	0.08344418	0.531385534	0.031583114	-0.029156223	-0.231039382	-0.250154319	0.449713853	0.291360234	0.375149576	0.097545943	1.515095648	2.337040451	1.636021929	0.924341453
8	NaN	0.076275169	NaN	0.013252686	0.429124517	0.37644637	-0.065502678	-0.18252567	0.152462691	0.387887602	0.06337115	-0.005520502	-0.279129738	-0.23320585	0.402615524	0.415420207	NaN	0.273062431	1.441736896	2.310706019	1.761518063	0.925618106
8.2	NaN	0.12566106	NaN	0.024488302	0.459403511	0.202652688	-0.149833603	-0.142237213	0.120883814	0.553798519	0.01372179	-0.089148553	-0.310177264	-0.168668532	0.512401795	0.330917502	NaN	0.563704161	1.368456215	2.318306869	1.839759368	1.058579858
8.4	NaN	0.119124916	NaN	0.081279007	0.48886738	0.262050718	-0.226537617	-0.195929052	0.223235087	0.718786261	-0.043114373	-0.165314404	-0.324657504	-0.201692731	0.372938417	0.313111142	NaN	0.630787909	1.569236301	2.095902502	1.838404706	0.978062639
8.6	NaN	0.13769142	NaN	-0.028845238	0.400745182	0.213007678	-0.199003427	-0.223142624	0.229790856	0.525189021	0.029882997	-0.11622712	-0.310218452	-0.158991432	0.626929635	0.276939698	NaN	0.522628438	1.735406105	2.018838121	1.892138133	1.018310238
8.8	NaN	0.052946551	NaN	-0.038375514	0.284279316	0.077097052	-0.172623089	-0.235205404	0.393247213	0.45711007	-0.014046423	0.002450273	-0.255563707	-0.067840111	0.78247329	0.205353472	NaN	0.400867179	1.742757844	2.021645071	1.879810839	1.078201639
9	NaN	-0.0061181	NaN	-0.110690852	0.269321142	0.047452047	-0.140573167	-0.107663128	0.404073724	0.392000581	0.002275085	-0.131152129	-0.22435279	-0.12145871	0.798145581	0.146099774	NaN	0.24282057	1.734757649	1.929980075	1.857019027	1.1896177
9.2	NaN	-0.027768599	NaN	NaN	0.291049487	-0.057834626	-0.015158964	-0.042456564	0.361917195	0.514326505	-0.009301505	-0.094293803	-0.236728966	0.00830771	0.830364075	0.078946395	NaN	0.374332685	1.840226079	1.65950408	1.75163632	1.274757411
9.4	NaN	-0.042365466	NaN	NaN	0.203020738	-0.004108059	-0.009748476	-0.013620076	0.322983492	0.435581862	0.020228408	-0.133952388	-0.194996918	0.129086073	0.834363626	0.001016284	NaN	0.397428074	1.91842244	1.147865618	1.699590672	1.221925064
9.6	NaN	-0.136645735	NaN	NaN	0.088685514	0.006659917	-0.084658392	-0.036526546	0.383507893	0.395778382	0.02149647	-0.125454125	-0.229290764	0.108424282	0.678316022	0.057877408	NaN	0.482772969	1.94589263	1.055133896	1.690707305	1.192616963
9.8	NaN	-0.129957546	NaN	-0.13941973	0.067371621	0.223695278	-0.177388058	-0.056882483	0.365443987	0.383453849	0.067858041	-0.121409061	-0.235540922	0.142188234	0.759858362	0.048938672	NaN	0.393301206	2.018380811	1.048644586	1.654633313	1.219919346
10	NaN	-0.122263139	NaN	-0.126057444	-0.061456499	0.320197299	-0.354828765	-0.123613358	0.167148796	0.372262302	0.022711407	-0.123744217	-0.207439055	0.122205745	0.819564539	0.054095823	NaN	0.12753966	2.043038697	1.094150184	1.652299627	1.088903503
10.2	NaN	-0.105172092	NaN	-0.195390979	-0.017343108	0.285982362	-0.371724043	-0.194546919	0.127161916	0.344814596	-0.082198292	-0.050381722	-0.151821515	0.14867231	0.811477336	0.048617995	NaN	-0.014531382	1.898719794	1.117605085	1.700893591	0.932819242
10.4	NaN	-0.171033384	NaN	-0.245015115	-0.007446067	0.271774779	-0.323131957	-0.230585608	0.191322397	0.28455213	-0.036824065	-0.077693422	-0.076312435	0.263245504	0.83937086	-0.000617676	NaN	-0.085255131	1.916072035	1.268350615	1.45025767	0.846976335
10.6	NaN	-0.176905832	NaN	-0.268361147	-0.073547328	0.305300319	-0.320787542	-0.243347479	0.224045088	0.320624709	-0.089656651	-0.098410671	0.039873326	0.347538489	0.725270205	-0.035096506	NaN	-0.035561831	1.792364553	1.380019404	1.164557074	0.747253909
10.8	NaN	-0.196982111	NaN	-0.180803875	-0.050653403	0.21639519	-0.347564814	-0.239456824	0.233166473	0.308365903	-0.033273151	-0.109251308	0.046103091	0.363093718	0.80275057	-0.048602963	NaN	0.050279116	1.697572856	1.285351437	0.956676376	0.647921211
11	NaN	-0.08228766	NaN	-0.076260278	0.028374456	0.126585697	-0.358699972	-0.163255471	0.191533304	0.210783877	0.082534983	-0.105157582	-0.0209599	0.279045868	0.8953156	-0.155633478	NaN	0.018358244	1.615515507	1.332806439	0.746716036	0.672084438
11.2	NaN	0.001205819	NaN	-0.051382472	-0.02754863	0.194753909	-0.321310506	-0.106532412	0.133419848	0.126051416	0.047951543	-0.135966065	-0.108440848	0.240098533	1.00628786	-0.259244766	NaN	-0.082035405	1.397587727	1.330309668	0.634519766	0.65212996
11.4	NaN	-0.052356439	NaN	-0.017695211	-0.087728038	0.277168221	-0.297969742	-0.096736293	0.182966323	0.10035448	-0.005764695	-0.109362514	-0.197450454	0.309196297	1.038234503	-0.27396088	NaN	-0.136546917	1.321434837	1.195311918	0.499503147	0.552968994
11.6	NaN	-0.083046827	NaN	0.036603587	-0.074323406	0.310115599	-0.256802019	-0.131838151	0.281772211	0.162240454	0.040000609	-0.072354318	-0.249652698	0.382104749	0.891125168	-0.13548411	NaN	-0.146608846	1.432901829	1.189808345	0.33234458	0.462484266
11.8	NaN	-0.071177016	NaN	0.011630257	-0.067729697	0.436946388	-0.245761728	-0.178307099	0.291464432	0.165316168	0.083598685	-0.108718275	-0.259122878	0.361967707	0.689212963	0.00774209	NaN	-0.206356107	1.33240662	1.128752279	0.270013739	0.450811825
12	NaN	-0.115220478	NaN	-0.037774605	-0.004384218	0.490317409	-0.31675438	-0.186651081	0.494754108	0.134439313	0.036748482	-0.121783104	-0.258704972	0.289951105	0.548620824	0.019372065	NaN	-0.270499558	1.109691581	1.024876589	0.250357887	0.482459664
12.2	NaN	-0.127229191	NaN	-0.044742662	0.04725141	0.458611878	-0.367477094	-0.223445133	0.804698421	0.107591513	0.004368251	-0.107124851	-0.290642133	0.316109937	0.545701926	-0.016121654	NaN	-0.290178807	1.024696233	1.026724562	0.190313923	0.404047783
12.4	NaN	-0.097253337	NaN	-0.061259525	-0.034572569	0.469284215	-0.331076077	-0.262217478	0.80726233	0.104807631	-0.036821503	-0.086902591	-0.27826775	0.373628371	0.517351235	-0.115414505	NaN	-0.341304353	0.952528009	0.946099102	0.118389592	0.241193764
12.6	NaN	-0.147623291	NaN	-0.084285167	-0.151658676	0.303906509	-0.229333778	-0.216806269	0.659315973	0.197898771	-0.118352137	-0.040215685	-0.202890453	0.341388277	0.378000437	-0.200595334	NaN	-0.368570947	0.831732108	0.736218846	0.087919737	0.119772124
12.8	NaN	-0.159217821	NaN	-0.108245933	-0.188698488	0.117347263	-0.169247092	-0.173094125	0.509406846	0.128914814	-0.067881893	-0.044363739	-0.160509014	0.364987887	0.229387488	-0.235738099	NaN	-0.285467772	0.659211479	0.526005611	0.09241699	0.084241231
13	NaN	-0.161337079	NaN	-0.100082941	-0.181936535	0.024894588	-0.174024147	-0.220483693	0.459476913	0.112250473	-0.043135527	-0.090118917	-0.079347073	0.489852408	0.154042193	-0.274341004	NaN	-0.208631667	0.506755496	0.470195595	0.074045915	0.099316803
13.2	NaN	-0.078874212	NaN	-0.098755562	-0.283020421	0.028885751	-0.251180912	-0.283018557	0.348746914	0.189307807	-0.008438751	0.006709986	0.026449904	0.536228586	0.279857074	-0.202004639	NaN	-0.272476312	0.248346799	0.35564314	0.010388371	0.074367776
13.4	NaN	-0.094624911	NaN	-0.191935217	-0.347427731	0.145772179	-0.28728217	-0.284855015	0.36155246	0.156220673	0.086392531	0.055985551	0.10715109	0.385908888	0.395663653	-0.234745817	NaN	-0.269548161	0.058222046	0.345358265	0.012416789	-0.073417453
13.6	NaN	-0.164665815	NaN	-0.204715112	-0.299470767	0.149095025	-0.288837696	-0.289872272	0.47279067	0.134581744	0.049372564	0.053299813	0.065629847	0.330723674	0.388956878	-0.310268826	NaN	-0.299835466	0.030148017	0.520662314	-0.048878865	-0.136453493
13.8	NaN	-0.120864883	NaN	-0.154420642	-0.216879917	0.282975469	-0.307012084	-0.286032851	0.448500982	0.120246129	0.030749759	0.07312045	0.086249118	0.387120783	0.567798312	-0.268372826	-0.851913266	-0.346389608	-0.075541417	0.697452264	-0.121620645	-0.161253268
14	NaN	-0.135290262	NaN	-0.148868706	-0.243198808	0.406394222	-0.303126494	-0.285121499	0.712023075	0.164600817	-0.096940323	-0.020421353	0.184394444	0.279129141	0.402788492	-0.24263531	-0.363811117	-0.335603794	-0.067951442	0.567054	-0.190016979	-0.1702005
14.2	NaN	-0.204476992	NaN	-0.224519697	-0.257365111	0.349020897	-0.284214742	-0.33750118	0.723019829	0.103373479	-0.096145826	0.073687247	0.396490967	0.291297396	0.250831586	-0.256916503	-0.383523275	-0.411989464	-0.218215803	0.579306067	-0.209278492	-0.162371347
14.4	NaN	-0.19242063	NaN	-0.198624961	-0.15585399	0.264660348	-0.381523775	-0.336650898	0.741014179	0.093105611	-0.059969038	0.139713779	0.618207035	0.220594352	0.108950836	-0.272376931	-0.489352522	-0.427242613	-0.237843049	0.616045286	-0.221758689	-0.194486803
14.6	NaN	-0.115322375	NaN	-0.219786749	-0.148662661	0.186230422	-0.399238421	-0.310729359	0.760070561	0.176996347	-0.032514958	0.070966021	0.459190459	0.29021918	0.02506541	-0.293439079	-0.819169842	-0.370731485	-0.099863591	0.423396997	-0.20112938	-0.197375982
