# Supplementary material for: Circuits for integrating learned and innate valences in the insect brain
Source: eLife journal article supplement (doi:10.7554/elife.62567), 2021-11-10
Supplement: supp [file elife-62567-supp-v1.zip › elife_poa_e62567_Figure_6_source_data_3.csv]

Individual GCaMP fluorescence values in response to Kenyon cells optogenetic activation by CN-33
Fluorescence values of the ROI over time for each repeats and each individuals as plotted in Figure 6c.
normalised_time	indiv1_repeat_1	indiv1_repeat_2	indiv2_repeat_1	indiv2_repeat_2	indiv3_repeat_1	indiv3_repeat_2	indiv4_repeat_1	indiv4_repeat_2	indiv5_repeat_1	indiv5_repeat_2	indiv6_repeat_1	indiv6_repeat_2	indiv7_repeat_1	indiv7_repeat_2	indiv8_repeat_1	indiv8_repeat_2
0	0.002924906	-0.030107289	0.032470019	0.001288431	-0.174446754	-0.022614832	-0.166825682	0.362915658	0.567038225	-0.305994328	-0.059698141	0.080920272	0.019593059	-0.0326816	-0.052541528	-0.316696425
0.2	0.079087266	-0.019887644	0.023242561	-0.009279011	-0.118049769	-0.38534564	-0.31467343	-0.003629502	0.313995827	-0.308437745	-0.122979397	0.039391171	-0.005340825	0.003085973	-0.220054695	-0.089394406
0.4	0.08610842	-0.165952491	0.013727388	-0.019012592	-0.30595385	-0.228449022	-0.156245854	0.030218494	-0.314981537	0.013879851	0.003774408	-0.162983254	-0.003919633	-0.074688813	0.137704917	-0.10187063
0.6	-0.089080432	-0.003627891	0.013675787	-0.116502924	-0.205629965	-0.212221061	-0.285535	0.016078813	0.104371498	-8.80E-05	-0.081390899	0.141736571	-0.08095442	-0.051629004	0.14899897	-0.142998153
0.8	-0.050167005	0.01143133	0.005982992	-0.103058865	-0.329055471	0.200832053	-0.138452441	-0.27360669	0.135761943	0.061455698	-0.285863043	-0.119329219	-0.092204804	-0.036958694	-0.037166126	-0.161756908
1	0.00623366	0.000353142	0.024770278	-0.036473497	-0.001829098	0.437426725	-0.094566614	-0.08019592	-0.17405759	-0.069752266	0.226350518	-0.090865815	-0.011437571	0.012346874	-0.05615439	0.032636301
1.2	-0.035914171	0.052607273	-0.055585757	0.00099022	0.126001724	0.379075504	-0.295007608	-0.05228671	-0.042014845	0.061337424	0.136941429	-0.121805217	-0.08803091	-0.016949872	-0.152200173	0.039724682
1.4	0.018502962	-0.000658525	-0.010527047	-0.009984003	-0.031186445	0.659690826	-0.095329308	-0.213273508	-0.32662967	0.171284493	0.000964336	0.026096929	-0.05061782	0.039377976	0.06472825	0.176750067
1.6	0.0254589	-0.235054971	0.102029288	-0.086957938	0.146855513	0.382624099	-0.240933144	-0.247463695	-0.384020373	0.292135688	0.127299106	0.165731414	-0.016552975	0.01531401	-0.249119606	0.369949921
1.8	-0.112797064	0.066207226	0.011465587	-0.046298744	-0.236909051	-0.010714601	-0.152447731	0.041541237	-0.746137669	0.035341379	0.049831319	0.016066035	-0.019463151	0.025476169	-0.094149776	0.166696096
2	-0.051135498	0.104356463	0.007899891	-0.023089195	-0.040039747	-0.066100379	-0.02260357	-0.153105065	-0.0577648	0.078051738	0.090993922	-0.096129225	-0.015624011	-0.004603018	-0.179213893	0.409968844
2.2	0.076467989	-0.167501964	0.059914293	-0.074617709	0.044109065	-0.275773253	-0.220286899	-0.177057454	-0.511843783	0.335903631	-0.000515124	0.032433329	0.021227872	0.03860756	-0.006499131	-0.148979732
2.4	-0.068610958	-0.086375013	0.061529344	-0.057436977	0.174954213	-0.241305986	0.226282857	-0.091706439	-0.38840667	0.066684023	0.167162872	-0.198305781	-0.001363425	0.018264975	0.053222749	0.254672621
2.6	-0.035852949	-0.015294814	0.014696825	-0.018335459	0.012793062	-0.300276665	-0.074168941	-0.167513004	-0.284251358	0.491507747	0.391955225	-0.084389984	0.125979328	0.0791816	-0.01450355	0.318802309
2.8	-0.04901944	-0.035533561	-0.018540143	-0.090858314	0.036258944	-0.378311	-0.3221426	-0.136032577	-0.478350839	-0.11295339	0.092072107	-0.087914215	0.01769289	0.04281953	-0.170307003	0.141190901
3	-0.009892905	-0.05591265	0.018677897	-0.037848294	-0.084244033	-0.345394096	-0.15150766	0.18032247	0.097128118	0.249446349	-0.080180125	-0.094074496	0.020676709	-0.013022442	0.070712488	-0.114957925
3.2	0.020089866	0.084211652	-0.039019378	0.005439152	0.161308748	-0.250194471	-0.25779631	0.126435482	-0.259120355	0.170560415	0.025750061	-0.075131961	0.087158876	0.076872108	-0.066681262	0.005633481
3.4	0.076883516	-0.105665106	-0.036940321	-0.006979663	0.03114266	-0.344026895	0.014947313	-0.022222628	-0.142639339	-0.167215636	-0.04235789	0.055672584	-0.009570225	0.005025755	-0.016882742	0.098665516
3.6	-0.090445853	-0.093202946	-0.075285635	0.037836017	0.000320044	-0.220058637	0.187579747	-0.204463853	0.930742469	-0.281779061	0.159730522	-0.026489237	0.033106645	-0.035979731	0.144363041	-0.041230546
3.8	-0.014773935	0.105944679	0.029359111	0.0399316	-0.151204846	0.243099548	0.301768747	0.093965552	0.113643479	0.612545827	0.131510447	-0.134077426	0.000699405	-0.028971215	0.309492007	0.026329601
4	0.11328487	0.109880884	0.019141632	0.081335821	0.295114118	0.192283967	0.51167658	0.010364288	0.288198829	-0.34182389	-0.092138509	-0.251686545	-0.004092295	-0.084655048	0.202975175	0.050866603
4.2	-0.075086583	0.001191737	-0.048468734	0.072131763	0.327917522	0.135783712	0.614493362	0.283268252	-0.375469464	-0.06530117	0.215171275	-0.281628311	0.020531944	-0.095685537	0.019993744	-0.13332166
4.4	0.007374086	0.039522367	-0.129598673	0.146851339	0.194539443	0.28666911	0.680847286	-0.091299521	-0.488134433	-0.229530093	0.004326091	0.094155937	0.038285939	-0.017542904	0.265485214	-0.012994577
4.6	-0.110683283	-0.019581092	-0.058196423	0.091282196	0.182660191	0.133368209	0.388376692	0.28937705	0.207447355	-0.342970672	0.235730587	0.204515993	0.038003795	0.005767232	-0.092399621	-0.054814004
4.8	-0.036907127	0.035866231	-0.006567939	0.081479559	0.071801312	-0.034134805	0.252654783	0.398959011	0.346583332	-0.684958124	-0.22492836	0.151175355	0.006253203	0.03547902	-0.274625378	0.046481159
5	-0.020527256	0.062211752	-0.100844541	0.032671264	-0.065493937	0.107973423	0.143778606	0.081426175	0.561355425	-0.080058683	0.103471597	0.155256742	0.036353072	0.051287261	0.244007648	0.124415233
5.2	0.078445555	-0.05810252	-0.104336246	0.050202431	-0.156867256	-0.039674463	0.094934356	0.4495648	0.346070566	0.16309267	-0.156070348	-0.024623462	0.098484275	0.031201148	0.088298551	-0.01304092
5.4	0.059071839	0.026854444	0.022397421	0.122905991	0.125377716	-0.059550753	0.28681686	0.384771006	-0.212568639	-0.31038528	0.125898193	0.375526453	0.062099809	0.074867229	-0.051615219	0.115904283
5.6	-0.100193778	0.098473809	0.013326906	0.071338412	-0.097497958	-0.095188709	0.408720777	0.401871336	0.44910202	-0.218574288	0.329552035	0.846205351	0.050970401	0.146350777	0.428501054	0.592520073
5.8	0.082887391	0.015436417	-0.029255079	0.123781173	-0.038293923	0.224343005	0.533877754	0.4882121	-0.208158224	-0.196917974	0.634624308	1.208133097	0.007109295	0.057989408	0.959336547	0.792034185
6	-0.082300967	-0.007829838	-0.038208791	0.251663039	0.425178817	0.588755342	0.166317503	0.209829106	0.282467939	0.492320518	0.276163916	2.049568072	-0.025392876	0.032988175	0.811277446	0.552442998
6.2	-0.152840893	0.030063143	-0.012227318	0.23292542	-0.021380671	0.860082849	-0.103269398	0.205760585	0.535134923	0.107734677	0.571993136	2.408757185	-0.067652287	0.097737066	1.06613273	0.952259266
6.4	-0.102839651	0.065475353	-0.016910504	0.26861027	0.218778583	0.768442958	-0.051346546	0.63931637	-0.196306762	-0.022623368	1.005800639	2.23768839	0.01951231	0.082288228	1.268367195	1.444102076
6.6	-0.076898947	-0.033488866	0.005079449	0.346133173	0.281150216	0.483647393	-0.104915682	0.276995225	1.28517359	-0.108759427	1.223879972	3.306234999	-0.028941266	0.050700965	1.549735714	1.891699431
6.8	-0.017140907	-0.016608563	-0.094230928	0.294818969	0.200868581	0.590280839	-0.178401588	0.070517308	0.994591388	-0.093400606	2.51581969	3.728456852	0.03501861	0.096574283	1.554643835	2.115146839
7	-0.069657014	0.146723205	0.01434932	0.35989676	0.064226322	0.429155116	-0.257321342	0.726281442	1.631724226	-0.712695543	2.616491997	3.779866512	-0.022329716	0.243064097	1.881208929	1.58473186
7.2	-0.120161005	0.026270661	-0.00308164	0.329118072	-0.057060269	0.287899214	-0.189769887	0.181482416	1.229037442	-0.110153199	2.158948877	3.451064326	-0.057440712	0.204775568	1.736163389	1.958647422
7.4	-0.171546865	0.01672863	0.016027956	0.330019974	-0.253973845	0.455250689	-0.361808607	0.083157313	0.724831271	-0.009214323	2.822713279	4.585319772	-0.119980828	0.1524331	2.067698149	1.889093312
7.6	-0.131357626	0.089772146	-0.079775027	0.26676015	-0.219135831	0.394275257	-0.429241907	0.252527181	1.197857608	0.341788105	2.242199264	4.177177477	-0.01424034	0.0871701	2.038040895	2.056852919
7.8	0.005185109	0.017623657	-0.080971949	0.354485817	-0.30488531	0.678403095	-0.303088251	0.166047665	0.770211759	0.023913496	2.56038436	3.928894606	-0.068180374	-0.027794992	2.073679234	2.272746101
8	-0.018466175	0.060720347	0.049374799	0.350032934	-0.303962998	0.447794492	-0.362416319	-0.103018958	0.999288435	0.283120246	2.832167589	3.783474603	-0.077496563	-0.008536047	1.757365435	2.141253948
8.2	0.003729992	0.078404382	0.128653854	0.330118597	-0.303784319	0.586044296	-0.358686297	-0.177661521	0.976006173	0.048987584	3.046751897	3.909145195	-0.088278787	-0.021780493	1.906229015	2.469603551
8.4	-0.064698918	-0.026429112	0.064886064	0.220722969	-0.316836801	0.402089475	-0.45043635	-0.170044564	0.560055098	0.013371323	2.621489327	5.13933955	-0.116962965	-0.057422334	1.745691503	2.366784388
8.6	0.021410613	0.011080799	0.048852675	0.138932169	-0.417647867	0.437359408	-0.287334249	-0.212721183	-0.19462965	0.317414758	2.938689189	3.939891249	-0.103803207	-0.012090639	1.577380832	2.086718339
8.8	0.010345532	0.086457452	-0.091337939	0.204171177	-0.14180544	0.434324493	-0.065825072	-0.228132553	1.034457349	0.534327936	2.438791223	3.813807409	-0.178618507	-0.024493099	1.364857603	1.267480903
9	-0.01567073	0.146223497	-0.165077189	0.178103622	-0.08792315	0.410908229	0.016279988	0.094825529	0.451111251	0.225471552	1.274004307	3.923451716	-0.235287063	-0.038513498	1.000620652	1.264384606
9.2	-0.112781498	0.120357598	-0.095738417	0.103542943	0.027621898	0.633917153	-0.025453854	-0.226919325	0.392618617	0.010974149	1.104553583	2.514713858	-0.198410522	0.031204435	1.021976108	0.55666309
9.4	-0.061433628	0.176695455	-0.021469987	0.054899963	-0.059744111	0.556056473	-0.051177861	-0.261528098	0.449284551	0.179738248	0.489559401	1.879703065	-0.180055347	-0.024611763	0.395116138	0.488443129
9.6	0.089332796	0.035658061	-0.030845641	0.118431737	0.181316868	0.339936965	-0.090207833	0.011674589	0.762704382	0.168860251	0.82583628	1.618102757	-0.188436069	0.034188322	0.582651841	0.355379713
9.8	0.012246544	0.119437495	-0.018929986	-0.013532245	0.100948905	0.840671959	-0.347926681	0.153055499	0.393174394	0.039529488	1.040241144	1.177994986	-0.195921829	-0.028332942	0.2537466	0.123058121
10	-0.034498322	0.116845452	0.040706873	0.057595463	0.031568677	0.789699911	-0.060866222	0.250862717	0.34144365	-0.60677089	0.701524683	0.38636976	-0.135066351	-0.030153814	0.377285562	0.094744134
10.2	-0.07973322	0.001116456	0.029411767	-0.004009168	-0.106008758	0.414767429	-0.139301588	0.249051688	0.69271463	0.055994128	0.974381393	1.265443484	-0.132816859	-0.02041743	0.131437658	0.066416664
10.4	0.077478384	-0.000961636	0.006124001	0.162353682	0.072970772	0.655018442	-0.105842155	0.116088517	0.838457977	0.128681761	0.667355578	0.547128013	-0.087916267	0.009382229	0.129021147	0.111924641
10.6	0.089565876	0.03598302	-0.019344261	0.126315147	-0.21078334	0.33011538	-0.183986677	-0.05300543	1.243786452	-0.04770241	0.290993775	0.189433029	-0.093516626	0.063881405	0.215010275	0.066668281
10.8	0.020205667	-0.047547769	-0.021120671	0.026315206	-0.113471299	0.361446168	-0.239396749	-0.053696457	0.771331747	-0.338588575	0.525339554	0.410411925	-0.122617223	0.015539606	0.112356392	-0.238054788
11	0.003704924	0.033535979	-0.001175104	-0.027615394	-0.059446348	0.122703694	-0.272585495	-0.071950019	1.029738785	0.054663951	0.205095339	0.541670935	-0.124007512	0.018636244	-0.105750965	-0.346289676
11.2	-0.042586569	-0.031663674	0.067202166	0.01271077	-0.166778365	0.09777359	-0.319275377	-0.062121248	1.166409462	0.389571121	0.320160947	0.659053978	-0.045127632	0.078753384	0.004519673	-0.091513515
11.4	0.011726016	0.069988105	0.011477164	0.050006629	0.142523123	0.154470775	-0.135823344	0.000902094	0.069855144	0.162249217	0.675137246	0.625218459	-0.034629019	0.090557553	0.26971118	-0.067953727
11.6	-0.026305303	0.017334605	0.035318492	0.204918074	0.008679004	0.147786763	-0.242235183	0.053152933	-0.100149654	-0.065366734	0.122187036	0.767328253	-0.045456073	0.078094598	0.106178075	-0.01892344
11.8	-0.039318869	-0.205289776	0.069011937	0.072054065	-0.00235261	0.027949673	-0.239738038	-0.249543818	0.623801913	-0.293407646	0.303700631	0.199498846	-0.005918997	0.086455301	0.169810294	0.102142962
12	-0.034211167	0.055775498	-0.114888215	0.255615234	-0.307439622	0.086400852	0.002648877	-0.085799361	0.865589833	-0.282935596	0.272812695	0.048291039	0.045854386	0.046373395	0.221309862	-0.000379281
12.2	0.082980781	0.04603032	-0.029849288	0.175149308	0.026976863	0.036002888	0.008358421	0.351667107	-0.142703215	0.505596124	0.080778551	-0.094097583	-0.033251914	0.094293661	0.075706508	0.001797214
12.4	-0.054239604	0.005877489	-0.060504155	0.107390485	0.3543611	0.031326962	0.235717782	0.020743821	-0.765149972	-0.04659166	0.776068361	0.020259251	0.007838859	0.087065281	-0.079703975	-0.04141524
12.6	0.073286399	-0.126143758	-0.045709276	0.318687225	0.258072117	0.096479704	0.166207401	-0.115123191	-0.525292728	0.192726621	0.207482486	-0.200759836	0.000164891	0.101447246	0.07169118	-0.097266545
12.8	-0.030992499	0.010822528	0.072125515	0.244598412	0.443530331	0.233677366	-0.130947791	-0.013662267	0.164377284	-0.339177911	0.529834377	0.028573283	-0.069263974	0.084349407	0.165376295	-0.038650393
