# Supplementary material for: Circuits for integrating learned and innate valences in the insect brain
Source: eLife journal article supplement (doi:10.7554/elife.62567), 2021-11-10
Supplement: supp [file elife-62567-supp-v1.zip › elife_poa_e62567_Figure_6_source_data_5.csv]

Value angles showing turn responses of control lines for CN-33 activation
Mean and std values of the turn angles over time in the control experimental groups shown in Figure 6 - supplement figure 2a-d
time_interval	stim_ON	Ctrl neuron no CN-33__mean	Ctrl neuron no CN-33__std	CN33_tsh__mean	CN33_tsh__std
20	0	0.954952108	0.574338488	13.21906046	15.31822412
20.5	0	0.955550441	0.577987593	14.16239925	16.08231241
21	0	0.975529836	0.572582805	14.03584915	16.40271214
21.5	0	0.967810466	0.590464575	14.26396009	17.12035427
22	0	0.971176292	0.591040575	14.56515354	17.47952778
22.5	0	0.977145904	0.592980491	14.04338241	16.04789749
23	0	0.978024605	0.587262481	14.50093631	16.55696216
23.5	0	0.984470989	0.597552017	14.08447833	16.28548889
24	0	0.992617893	0.598643947	13.64283156	15.29331669
24.5	0	0.979094626	0.588632768	14.03715577	16.55801855
25	0	0.984270463	0.60448864	14.17223331	15.97391201
25.5	0	0.979875469	0.609210794	14.69701041	17.11764985
26	0	0.973967733	0.59468687	15.26441675	17.76398733
26.5	0	0.976669051	0.583169901	14.97901104	16.60163966
27	0	0.966563566	0.594425982	14.66237137	16.80113529
27.5	0	0.972747627	0.597434309	14.71965193	16.63496761
28	0	0.986527539	0.590514881	14.88916338	19.32621611
28.5	0	0.965632917	0.60318445	14.32494323	18.1193273
29	0	0.97800385	0.601844184	13.89048606	15.56842445
29.5	0	0.990689679	0.601279155	13.62799362	15.65574517
30	0	0.940202627	0.586475618	14.65952265	16.62658421
30.5	1	0.852393038	0.538097252	15.139511	17.47005164
31	1	0.793195634	0.531425283	16.68461299	18.06292509
31.5	1	0.853544539	0.565126551	17.89708847	18.15231605
32	1	0.870947941	0.593422005	16.60554488	16.30312556
32.5	1	0.876693246	0.594711982	15.77651556	15.81222497
33	1	0.891945337	0.58090196	15.70461735	15.37392904
33.5	1	0.895719042	0.582743663	15.68072885	15.0085109
34	1	0.887414706	0.594114192	14.6687694	14.5144577
34.5	1	0.896377869	0.580357569	15.02999485	14.34574707
35	1	0.865590638	0.579019875	14.5161061	14.08244838
35.5	1	0.882557752	0.565236484	14.77828049	14.32564984
36	1	0.887913322	0.563243668	14.52784671	13.90464655
36.5	1	0.905130856	0.570584199	14.7842453	15.01439891
37	1	0.919893107	0.592295049	15.03032055	15.49135484
37.5	1	0.909382634	0.573719935	14.33322426	15.53750331
38	1	0.918947894	0.584006661	14.09068622	15.34691804
38.5	1	0.912340374	0.57464107	14.12534346	15.44937291
39	1	0.902243368	0.582677278	14.20528992	15.26165927
39.5	1	0.905432771	0.58733446	14.11836504	15.13579542
40	1	0.922854964	0.58333625	14.20986689	14.547193
40.5	1	0.934903518	0.579265438	14.280386	14.72275939
41	1	0.943578131	0.579129966	14.36034148	16.22928097
41.5	1	0.935754088	0.592640886	14.80095766	16.03367986
42	1	0.959623704	0.607902496	14.74398549	16.73023562
42.5	1	0.950387958	0.61168141	14.60346119	16.52583615
43	1	0.954133096	0.592443066	14.563344	16.5964538
43.5	1	0.940945278	0.572179561	13.94692099	15.59447366
44	1	0.935435035	0.584931396	14.52100392	17.16324836
44.5	1	0.955972018	0.57151275	13.74615011	14.88127533
45	1	0.938490557	0.589408843	14.29403162	15.30353775
45.5	0	0.923813732	0.585719258	13.97159995	14.74465565
46	0	0.908885339	0.598568899	14.02090769	13.99473042
46.5	0	0.894573839	0.613870533	13.56007216	13.81395005
47	0	0.914049763	0.60159198	13.72349611	15.40112096
47.5	0	0.939754686	0.624149529	14.21798318	15.1887437
48	0	0.947585676	0.623412841	14.3983707	15.74749725
48.5	0	0.945745194	0.619365143	14.38276533	14.90683063
49	0	0.950361698	0.604464912	14.73040081	15.92002784
49.5	0	0.944397213	0.626134543	15.05639776	16.1981907
50	0	0.949158358	0.609836603	14.94848097	16.47270681
50.5	0	0.952522792	0.601069828	15.07159515	16.10357707
51	0	0.971591137	0.608108362	14.92849513	16.5124933
51.5	0	0.950025968	0.605149148	14.38187496	16.81096511
52	0	0.951094419	0.600153233	15.69016844	18.76039747
52.5	0	0.94451191	0.594093295	15.41206119	18.57586993
53	0	0.927150485	0.593956096	15.77080889	18.89230186
53.5	0	0.910949	0.584304082	15.05618144	18.01025428
54	0	0.930732772	0.580367298	14.88466195	17.09899758
54.5	0	0.944405034	0.584399835	15.44243656	17.89831034
55	0	0.940637169	0.575150511	15.20075694	17.87740122
