# Supplementary material for: Circuits for integrating learned and innate valences in the insect brain
Source: eLife journal article supplement (doi:10.7554/elife.62567), 2021-11-10
Supplement: supp [file elife-62567-supp-v1.zip › elife_poa_e62567_Supplementary_File_2.csv]

1. Response to odour presentation and KC activation (Wilcoxon sign rank)
	Prob>0								Prob>0										Max	Ampli
SS02163>GCamp, KC>TNT								SS02108>GCamp, KC>TNT
FIG.4c: Response to Ethyl acetate	0.008	**						FIG.6b: Response to Ethyl acetate	0.031	*									0.004	0.008
																			0.004	0.004
SS02163>GCamp, KC>Chrimson _ in vivo								SS02108>GCamp, KC>Chrimson _ in vivo											0.004	0.008
FIG.4c: Response to Ethyl acetate	0.016	*						FIG.6b: Response to Ethyl acetate	0.016	*									0.004	0.008
FIG.4d: Response to KC activation	0.077							FIG.6c: Response to KC activation	0.945										0.012	0.129
FIG.4d: Amplitude [Response to KC activation]	0.021	*						FIG.6c: Amplitude [Response to KC activation]	0.023	*									0.039	0.027
FIG.4d: Response to KC activation offset	0.016	not shown						FIG.6c: Response to KC activation offset	0.195
FIG.4e: SS02163>GCamp, KC>Chrimson _ ex vivo								FIG.6d: SS02108>GCamp, KC>Chrimson _ ex vivo											0.039	0.098
SALINE								SALINE											0.820	0.820
Response to KC activation	0.129							Response to KC activation	0.129
Amplitude [Response to KC activation]	0.027	*						Amplitude [Response to KC activation]	0.039	*
PTX								PTX
Response to KC activation	0.004	**						Response to KC activation	0.008	**
Amplitude [Response to KC activation]	0.004	not shown						Amplitude [Response to KC activation]	0.039	not shown
MCA								MCA
Response to KC activation	0.055							Response to KC activation	0.195
Amplitude [Response to KC activation]	0.164							Amplitude [Response to KC activation]	0.195
Saline vs PTX	0.004	**						Saline vs PTX	0.016	*
Saline vs MCA	0.820							Saline vs MCA	0.844
FIG.5a: SS02163>GCamp, Basin>Chrimson
CS+ pre training	0.004	**
CS- pre training	0.004	**
CS+ post training	0.004	**
CS- post training	0.008	**
CS+ vs CS- pre training	0.055	ns
CS+ vs CS- post training	0.020	*
CS+ pre- vs post-training	0.012	*
CS- pre- vs post-training	0.570	ns
2. inter-indiv variability (ANOVA)
2.1. in response to KC activation & Ethyl acetate
	Source	Sum Sq.	d.f.	Mean Sq.	Fisher F	Prob>F	R sq.		Source	Sum Sq.	d.f.	Mean Sq.	F	Prob>F	R sq.
FIG.4c-d: SS02163>GCamp, KC>Chrimson _ in vivo								FIG.6b-c: SS02108>GCamp, KC>Chrimson _ in vivo
	Individuals	4.5	11	0.40	11.08	0.00	0.18		Individuals	11.4	7	1.62	35.36	2.9E-26	0.33
	Type of stim	1.3	1	1.27	34.81	0.00	0.05		Type of stim	3.0	1	3.03	65.98	4.8E-13	0.09
	Individuals*Type of stim	4.4	11	0.40	10.96	0.00	0.18		Individuals*Type of stim	11.2	7	1.61	35.02	4.2E-26	0.32
	Error	14.1	290	0.04	[]	[]			Error	9.1	119	0.05	[]	[]
	Total	24.3	326	[]	[]	[]			Total	34.7	143	[]	[]	[]
2.2. in response to Ethyl acetate
	Source	Sum Sq.	d.f.	Mean Sq.	Fisher F	Prob>F	R sq.		Source	Sum Sq.	d.f.	Mean Sq.	F	Prob>F	R sq.
FIG.4c: SS02163>GCamp, [KC>Chrimson]	Individuals	7.3	11	0.67	11.46	0.0000	0.45	FIG.6b: SS02108>GCamp, [KC>Chrimson]	Individuals	21.2	7	3.02	40.49	0.0000	0.82
	Error	8.8	152	0.06	[]	[]			Error	4.8	64	0.07	[]	[]
	Total	16.1	163	[]	[]	[]			Total	25.9	71	[]	[]	[]
FIG.4c: SS02163>GCamp, KC>TNT	Individuals	5.6	5	1.13	3.32	0.01	0.22	Fig.6b: SS02108>GCamp, KC>TNT	Individuals	7.2	7	1.03	7.20	1.21E-06	0.39
	Error	19.6	58	0.34	[]	[]			Error	11.2	78	0.14	[]	[]
	Total	25.3	63	[]	[]	[]			Total	18.4	85	[]	[]	[]
2.3. in response to KC activation
	Source	Sum Sq.	d.f.	Mean Sq.	Fisher F	Prob>F	R sq.		Source	Sum Sq.	d.f.	Mean Sq.	F	Prob>F
FIG.4e: SS02163>GCamp, KC>Chrimson _ ex vivo								FIG.6d: SS02108>GCamp, KC>Chrimson _ ex vivo
with saline	Individuals	962	8	120.29	6.58	0.00	0.55	with saline	Individuals	356.7	8	44.58	3.22	0.00	0.34
	Error	786	43	18.28	[]	[]			Error	707.2	51	13.87	[]	[]
	Total	1748	51	[]	[]	[]			Total	1063.9	59	[]	[]	[]
with PTX	Individuals	32882.3	8	4110.29	26.94	0.00	0.87	with PTX	Individuals	10259.9	7	1465.70	35.34	0.00	0.89
	Error	4729.7	31	152.57	[]	[]			Error	1327.0	32	41.47	[]	[]
	Total	37612.0	39	[]	[]	[]			Total	11586.9	39	[]	[]	[]
with MCA	Individuals	1262	8	157.69	31.72	0.00	0.87	with MCA	Individuals	18.0	7	2.57	0.70	0.67	0.10
	Error	194	39	4.97	[]	[]			Error	162.2	44	3.69	[]	[]
	Total	1455	47	[]	[]	[]			Total	180.2	51	[]	[]	[]
FIG.4d: SS02163>GCamp, KC>Chrimson _ in vivo								FIG.6c: SS02108>GCamp, KC>Chrimson _ in vivo
	individuals'	1.6	11	0.14	5.97	0.00	0.30		Individuals	1.5	7	0.21	4.35	0.00	0.32
	Error'	3.6	151	0.02	[]	[]			Error	3.1	64	0.05	[]	[]
	Total'	5.1	162	[]	[]	[]			Total	4.5	71	[]	[]	[]
2.4. before vs. after aversive training; paired vs. unpaired odor
FIG.5a: SS02163>GCamp, Basin>Chrimson	Source	Sum Sq.	d.f.	Mean Sq.	Fisher F	Prob>F	R sq.
	individuals	59.9	8	7.49	21.40	0.000	0.64
	timing	8.1	1	8.10	23.15	0.000	0.27
	odor	0.6	1	0.56	1.61	0.207
	individuals*timing	26.1	8	3.26	9.32	0.000
	individuals*odor	2.8	8	0.36	1.02	0.429
	timing*odor	3.2	1	3.16	9.02	0.003
	Error	36.4	104	0.35	[]	[]
	Total	138.1	131	[]	[]	[]
