# Supplementary figures and images for: Circuits for integrating learned and innate valences in the insect brain
Source: eLife journal article supplement (doi:10.7554/elife.62567), 2021-11-10

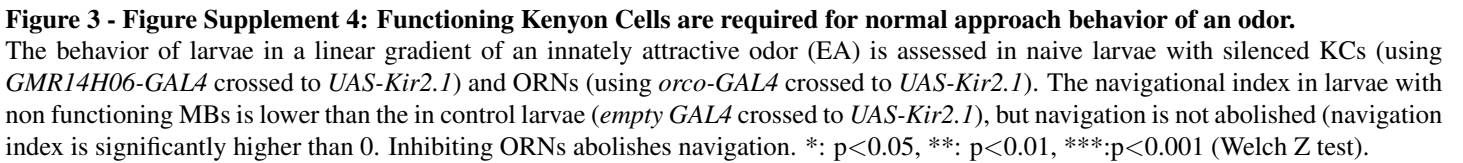

Supplement: supp [file elife-62567-supp-v1.zip › elife_poa_e62567_Figure_3_figure_supplement_4.pdf]
